# Supplementary material for: Cross-linking of aromatic phenolate groups by cytochrome P450 enzymes: a model for the biosynthesis of vancomycin by OxyB
Source: Royal Society of Chemistry journal article supplement (doi:10.1039/d0ob01023e), 2020-01-01
Supplement: d0ob01023e1.pdf [file d0ob01023e1.pdf]

## Electronic Supporting Information

### **Cross-linking of aromatic phenolate groups by cytochrome P450 enzymes: A model for the biosynthesis of vancomycin by OxyB**

Hafiz Saqib Ali,<sup>a,b</sup> Richard H. Henchman<sup>a,b</sup> and Sam P. de Visser<sup>\*a,c</sup>

<sup>a</sup>The Manchester Institute of Biotechnology, The University of Manchester, 131 Princess Street, Manchester M1 7DN, United Kingdom.

<sup>b</sup>Department of Chemistry, The University of Manchester, Oxford Road, Manchester, M13 9PL, United Kingdom.

<sup>c</sup>Department of Chemical Engineering and Analytical Science, The University of Manchester, Oxford Road, Manchester, M13 9PL, United Kingdom.

*E-mail:* [sam.devisser@manchester.ac.uk](mailto:sam.devisser@manchester.ac.uk).

## Methods:

### Model set-up:

Our model set-up follows previously reported methods and will be briefly summarised here.<sup>1</sup> We started our work from the 1LG9 protein databank (pdb) file, which is a P450 monomer of the resting state structure of OxyB. The docking of the prepared substrate with the OxyB was carried out using AutoDock Vina 4.0v.<sup>2</sup> The UCSF Chimera software<sup>3</sup> was used for visualizing the various docking poses and we selected the most stable substrate-bound structure. Subsequently, hydrogen atoms were added in Chimera. The model was based on the active site of the 1LG9 pdb structure with residues selected as highlighted in Scheme S1 below. We took the heme and replaced all side chains by hydrogen atoms except propionate group A, which was included in the model. The axial cysteinate (Cys<sub>347</sub>) was abbreviated to methylmercaptate and the resting state iron(III)-(water)heme replaced by iron(IV)-oxo heme cation radical or Compound I. The substrate binding pocket was described through the chains Leu<sub>235</sub>-Ala<sub>236</sub>-Gly<sub>237</sub>-Asp<sub>238</sub>-Asp<sub>239</sub>-Asn<sub>240</sub>-Ile<sub>241</sub> with Asp<sub>238</sub> abbreviated to Gly. In addition, the following groups were part of the model: namely, dimethylsulfide for Met<sub>55</sub> and the small chain Gln<sub>232</sub>-Val<sub>233</sub> and Pro<sub>286</sub>. The complete model had a total number of atoms of 258 and was calculated in the doublet and quartet spin states.

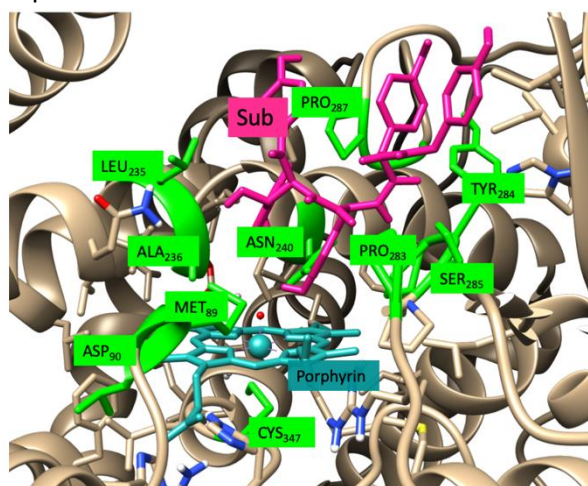

**Fig. S1:** Active site model of substrate bound complex of OxyB taken from the pdb file.

### Computational methods:

All the quantum mechanical calculations were done using density functional theory (DFT) methods which are implemented in Gaussian-09.<sup>4</sup> In previous work we extensively tested and benchmarked models and methods for P450 reaction mechanisms and reproduced experimental structures and rate constants well.<sup>5, 6</sup> All calculations used the unrestricted B3LYP hybrid density functional method,<sup>7</sup> in combination with a basis set containing an LANL2DZ + ECP on iron and 6-31G\* on the rest of the atoms (basis set BS1).<sup>8</sup> Full geometry optimizations, frequencies and scan calculations were run for all structures using UB3LYP/BS1 in the gas-phase. Subsequent single point calculations with the polarized continuum model (CPCM)<sup>9</sup> were performed with a dielectric constant mimicking chlorobenzene, and a triple- $\zeta$  quality basis set (basis set BS2) containing LACV3P+ + ECP on iron and 6-311+G\* on the rest of the atoms.

## References:

1. A. S. Faponle, M. G. Quesne and S. P. de Visser, *Chem. Eur. J.*, 2016, **22**, 5478.
2. O. Trott and A. J. Olson, AutoDock Vina: improving the speed and accuracy of docking with a new scoring function, efficient optimization, and multithreading. *J. Comput. Chem.*, 2010, **31**, 455.
3. E. F. Pettersen, T. D. Goddard, C. C. Huang, G. S. Couch, D. M. Greenblatt, E. C. Meng and T. E. Ferrin, UCSF Chimera—A visualization system for exploratory research and analysis. *J. Comput. Chem.*, 2004, **25**, 1605.
4. M. J. Frisch, G. W. T., H. B. Schlegel, G. E. Scuseria, M. A. Robb, J. R. Cheeseman, G. Scalmani, V. Barone, B. Mennucci, G. A. Petersson, H. Nakatsuji, M. Caricato, X. Li, H. P. Hratchian, A. F. Izmaylov, J. Bloino, G. Zheng, J. L. Sonnenberg, M. Hada, M. Ehara, K. Toyota, R. Fukuda, J. Hasegawa, M. Ishida, T. Nakajima, Y. Honda, O. Kitao, H. Nakai, T. Vreven, J. A. Montgomery, Jr., J. E. Peralta, F. Ogliaro, M. Bearpark, J. J. Heyd, E. Brothers, K. N. Kudin, V. N. Staroverov, R. Kobayashi, J. Normand, K. Raghavachari, A. Rendell, J. C. Burant, S. S. Iyengar, J. Tomasi, M. Cossi, N. Rega, J. M. Millam, M. Klene, J. E. Knox, J. B. Cross, V. Bakken, C. Adamo, J. Jaramillo, R. Gomperts, R. E. Stratmann, O. Yazyev, A. J. Austin, R. Cammi, C. Pomelli, J. W. Ochterski, R. L. Martin, K. Morokuma, V. G. Zakrzewski, G. A. Voth, P. Salvador, J. J. Dannenberg, S. Dapprich, A. D. Daniels, Ö. Farkas, J. B. Foresman, J. V. Ortiz, J. Cioslowski, and D. J. Fox, Gaussian 09 (Gaussian, Inc., Wallingford CT, 2009).
5. S. Kumar, A. S. Faponle, P. Barman, A. K. Vardhaman, C. V. Sastri, D. Kumar and S. P. de Visser, *J. Am. Chem. Soc.*, 2014, **136**, 17102.
6. F. G. Cantú Reinhard, A. S. Faponle and S. P. de Visser, *J. Phys. Chem. A*, 2016, **120**, 9805.
7. A. D. Becke, *Phys. Rev. A*, 1988, **38**, 3098.
8. W. R. Wadt and P. J. Hay, *J. Chem. Phys.*, 1985, **82**, 284.
9. M. Cossi, G. Scalmani, N. Rega and V. Barone, *J. Chem. Phys.*, 2002, **117**, 43.

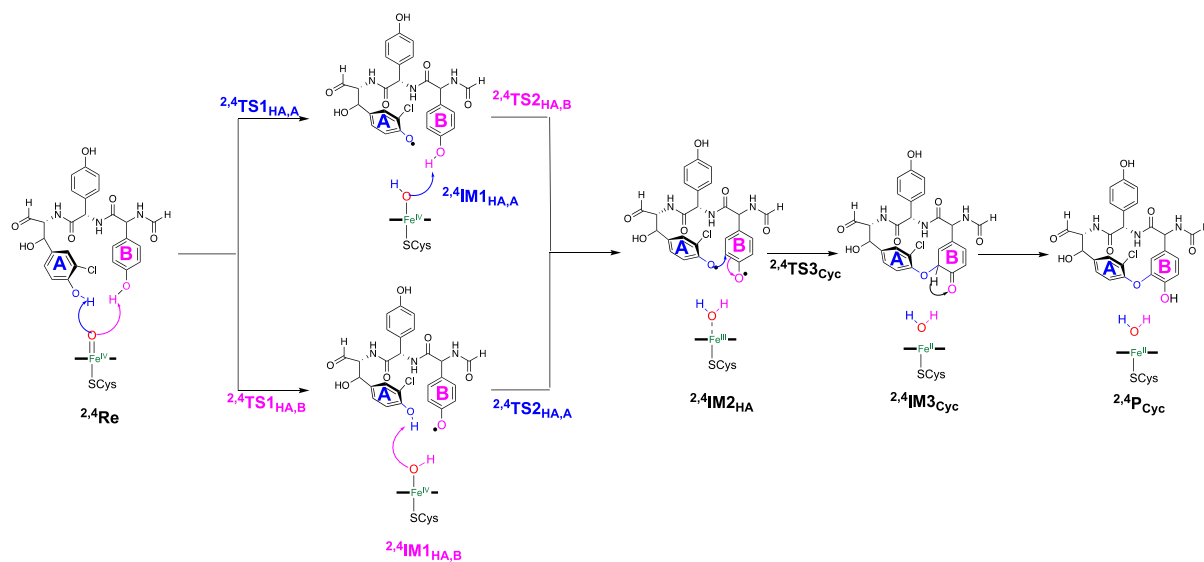

**Scheme S1:** Reaction mechanism and definition of structures studied in this work.

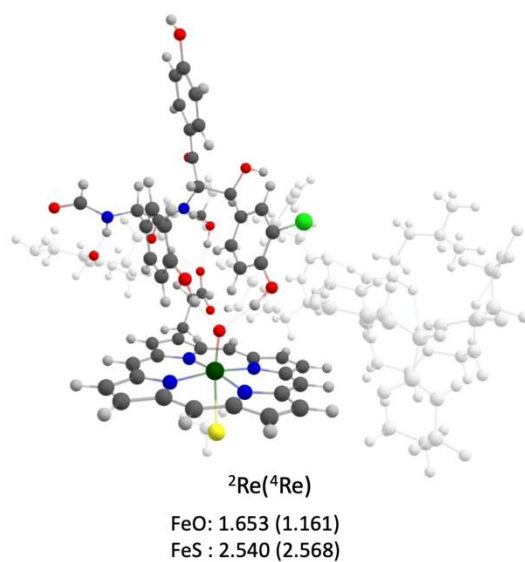

**Fig. S2:** The optimized structures of reactant complex calculated using UB3LYP/BS1/UB3LYP/BS2. The bond lengths are in angstroms.

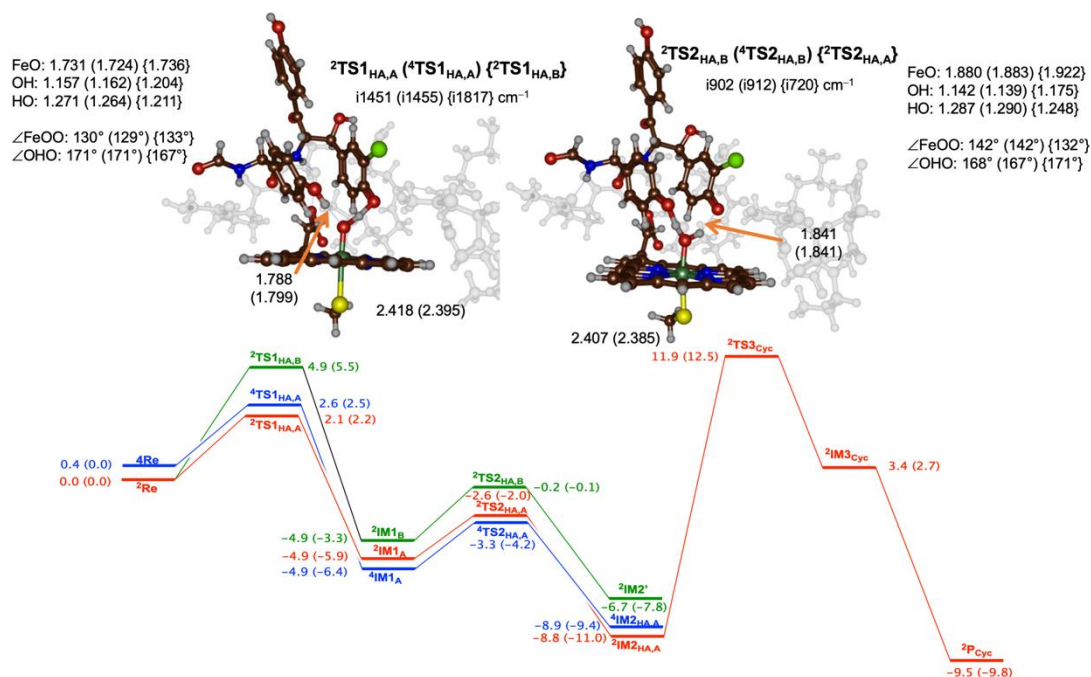

**Fig. S3:** Potential energy profile of substrate cyclization by iron(IV)-oxo of OxyB calculated using UB3LYP/BS1/UB3LYP/BS2. Data for  $\Delta E + \text{ZPE}$  ( $\Delta G^{298\text{K}}$ ) are given in kcal mol<sup>-1</sup>. The optimized geometries of transition states have bond lengths in angstroms and imaginary frequencies in cm<sup>-1</sup>.

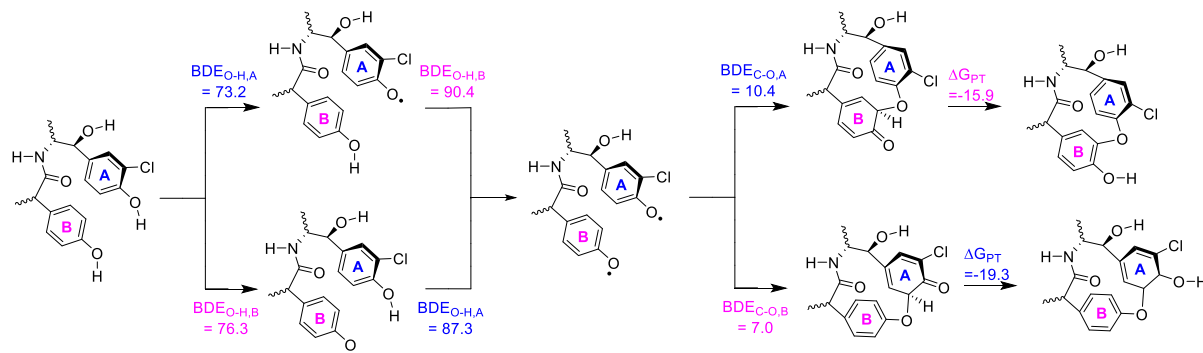

**Scheme S2:** UB3LYP/BS2//UB3LYP/BS1 calculated bond dissociation free energies (BDE) for bonds broken or formed in each step. The last step represents an isomerization free energy.  $\Delta G$  values in kcal mol<sup>-1</sup>.

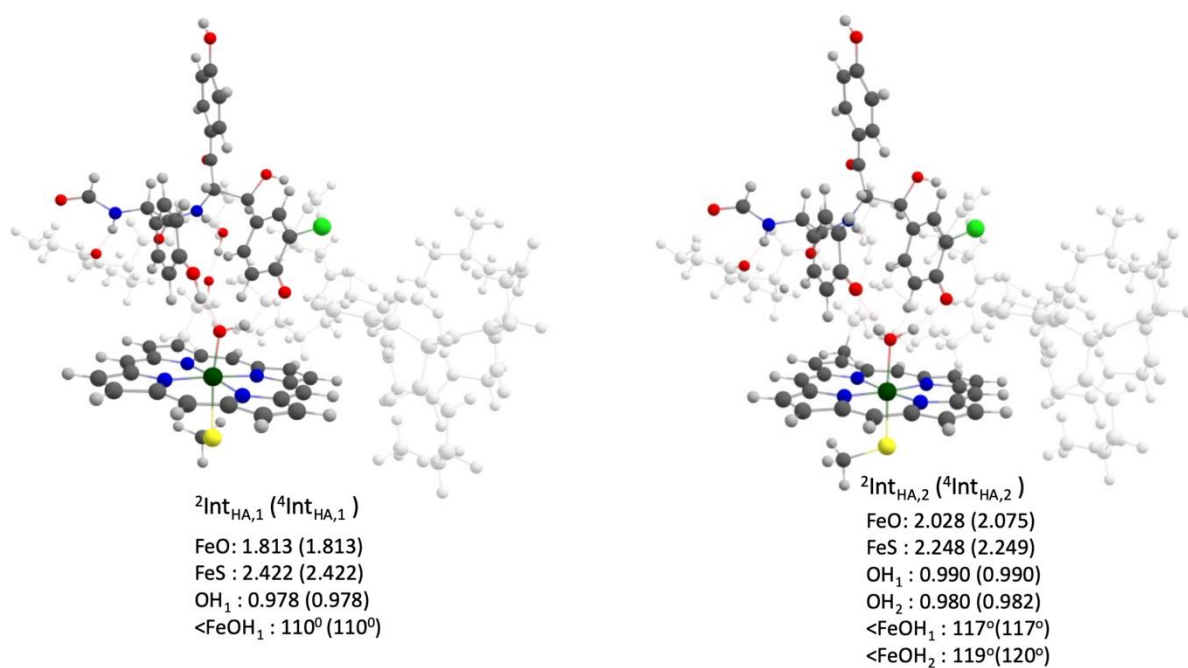

**Fig. S4:** The optimized structures of intermediates calculated using UB3LYP/BS1/UB3LYP/BS2. The bond lengths and bond angles are in angstroms.

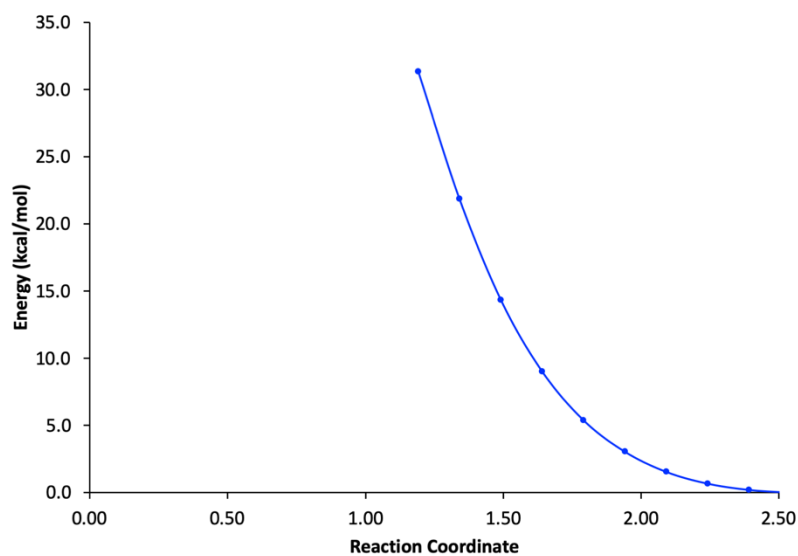

**Fig. S5:** UB3LYP/BS1 calculated geometry scan for direct ring-closure from  $^2\text{IM1}_A$ . As can be seen this is an unfavorable pathway that does not lead to a stable product.

**Table S1:** Absolute (free) energies (in au) of optimized geometries of the OxyB model with substrate in binding position A for the cyclization reaction as calculated at the UB3LYP level of theory in the doublet spin state.

| System                           | BS1          |              |              | BS2 + Solv   |              |              |
|----------------------------------|--------------|--------------|--------------|--------------|--------------|--------------|
|                                  | E            | E+ZPE        | G            | E            | E+ZPE        | G            |
| <sup>2</sup> Re                  | -7749.328659 | -7747.223033 | -7747.430764 | -7751.422483 | -7749.316857 | -7749.524588 |
| <sup>2</sup> TS1 <sub>HA,A</sub> | -7749.315416 | -7747.217109 | -7747.424724 | -7751.411862 | -7749.313555 | -7749.521170 |
| <sup>2</sup> IM1 <sub>A</sub>    | -7749.332881 | -7747.229071 | -7747.438445 | -7751.428400 | -7749.324590 | -7749.533963 |
| <sup>2</sup> TS2 <sub>HA,B</sub> | -7749.321752 | -7747.223790 | -7747.430533 | -7751.418929 | -7749.320967 | -7749.527710 |
| <sup>2</sup> IM2 <sub>B</sub>    | -7749.333152 | -7747.231352 | -7747.442562 | -7751.432653 | -7749.330853 | -7749.542063 |
| <sup>2</sup> TS3 <sub>Cyc</sub>  | -7749.312327 | -7747.207609 | -7747.414520 | -7751.402555 | -7749.297837 | -7749.504748 |
| <sup>2</sup> IM3 <sub>Cyc</sub>  | -7749.330201 | -7747.223070 | -7747.431964 | -7751.418564 | -7749.311433 | -7749.520327 |
| <sup>2</sup> P <sub>Cyc</sub>    | -7749.353495 | -7747.245529 | -7747.453735 | -7751.439955 | -7749.331989 | -7749.540195 |

**Table S2:** Relative (free) energies (in kcal mol<sup>-1</sup>) of optimized geometries of the OxyB model with substrate in binding position A for the cyclization reaction as calculated at the UB3LYP level of theory in the doublet spin state.

| System                           | BS1    |        |        | BS2 + Solv |        |        |
|----------------------------------|--------|--------|--------|------------|--------|--------|
|                                  | ΔE     | ΔE+ZPE | ΔG     | ΔE         | ΔE+ZPE | ΔG     |
| <sup>2</sup> Re                  | 0.00   | 0.00   | 0.00   | 0.00       | 0.00   | 0.00   |
| <sup>2</sup> TS1 <sub>HA,A</sub> | 8.31   | 3.72   | 3.79   | 6.67       | 2.07   | 2.15   |
| <sup>2</sup> IM1 <sub>A</sub>    | -2.65  | -3.79  | -4.82  | -3.71      | -4.85  | -5.88  |
| <sup>2</sup> TS2 <sub>HA,B</sub> | 4.33   | -0.48  | 0.14   | 2.23       | -2.58  | -1.96  |
| <sup>2</sup> IM2 <sub>B</sub>    | -2.82  | -5.22  | -7.40  | -6.38      | -8.78  | -10.97 |
| <sup>2</sup> TS3 <sub>Cyc</sub>  | 10.25  | 9.68   | 10.19  | 12.51      | 11.94  | 12.45  |
| <sup>2</sup> IM3 <sub>Cyc</sub>  | -0.97  | -0.02  | -0.75  | 2.46       | 3.40   | 2.67   |
| <sup>2</sup> P <sub>Cyc</sub>    | -15.58 | -14.12 | -14.41 | -10.96     | -9.50  | -9.79  |

**Table S3:** Absolute (free) energies (in au) of optimized geometries of the OxyB model with substrate in binding position A for the cyclization reaction as calculated at the UB3LYP level of theory in the quartet spin state.

| System                           | BS1          |              |              | BS2 + Solv   |              |              |
|----------------------------------|--------------|--------------|--------------|--------------|--------------|--------------|
|                                  | E            | E+ZPE        | G            | E            | E+ZPE        | G            |
| <sup>4</sup> Re                  | -7749.328330 | -7747.222680 | -7747.431047 | -7751.421956 | -7749.316307 | -7749.524673 |
| <sup>4</sup> TS1 <sub>HA,A</sub> | -7749.315625 | -7747.216945 | -7747.424850 | -7751.411364 | -7749.312684 | -7749.520589 |
| <sup>4</sup> IM1 <sub>A</sub>    | -7749.332892 | -7747.229080 | -7747.439158 | -7751.428473 | -7749.324661 | -7749.534739 |
| <sup>4</sup> TS2 <sub>HA,B</sub> | -7749.322312 | -7747.223841 | -7747.433143 | -7751.420515 | -7749.322044 | -7749.531346 |
| <sup>4</sup> IM2 <sub>B</sub>    | -7749.333199 | -7747.231781 | -7747.440309 | -7751.432434 | -7749.331016 | -7749.539544 |
| <sup>4</sup> IM3 <sub>Cyc</sub>  | -7749.336811 | -7747.234184 | -7747.446011 | -7751.425650 | -7749.323023 | -7749.534850 |

**Table S4:** Relative (free) energies (in kcal mol<sup>-1</sup>) of optimized geometries of the OxyB model with substrate in binding position A for the cyclization reaction as calculated at the UB3LYP level of theory in the quartet spin state.

| System                           | BS1   |        |       | BS2 + Solv |        |       |
|----------------------------------|-------|--------|-------|------------|--------|-------|
|                                  | ΔE    | ΔE+ZPE | ΔG    | ΔE         | ΔE+ZPE | ΔG    |
| <sup>4</sup> Re                  | 0.21  | 0.22   | -0.18 | 0.33       | 0.35   | -0.05 |
| <sup>4</sup> TS1 <sub>HA,A</sub> | 8.18  | 3.82   | 3.71  | 6.98       | 2.62   | 2.51  |
| <sup>4</sup> IM1 <sub>A</sub>    | -2.66 | -3.79  | -5.27 | -3.76      | -4.90  | -6.37 |
| <sup>4</sup> TS2 <sub>HA,B</sub> | 3.98  | -0.51  | -1.49 | 1.24       | -3.25  | -4.24 |
| <sup>4</sup> IM2 <sub>B</sub>    | -2.85 | -5.49  | -5.99 | -6.24      | -8.88  | -9.38 |
| <sup>4</sup> IM3 <sub>Cyc</sub>  | -5.12 | -7.00  | -9.57 | -1.99      | -3.87  | -6.44 |

**Table S5:** Group spin densities of optimized geometries of the OxyB model with substrate as calculated at the UB3LYP level of theory in the doublet spin state.

| System                           |         | Fe     | O       | Porphyrin | Substrate | Amino Acids | Total |
|----------------------------------|---------|--------|---------|-----------|-----------|-------------|-------|
| <sup>2</sup> Re                  | Gas     | 1.3992 | 0.7158  | -0.3133   | 0.007     | -0.8083     | 1.00  |
|                                  | Solvent | 1.7694 | 0.6698  | -0.7538   | -0.0188   | -0.6667     | 1.00  |
| <sup>2</sup> TS1 <sub>HA,A</sub> | Gas     | 1.7339 | 0.3988  | -0.6508   | -0.0256   | -0.4562     | 1.00  |
|                                  | Solvent | 2.1231 | 0.3766  | -1.2289   | -0.0515   | -0.2193     | 1.00  |
| <sup>2</sup> IM1 <sub>A</sub>    | Gas     | 0.9700 | 0.0601  | 0.5460    | -0.7993   | 0.2233      | 1.00  |
|                                  | Solvent | 1.0791 | 0.1268  | 0.1728    | -1.0059   | 0.6271      | 1.00  |
| <sup>2</sup> TS2 <sub>HA,B</sub> | Gas     | 1.0843 | 0.0351  | -0.4685   | 0.9899    | -0.6408     | 1.00  |
|                                  | Solvent | 1.3475 | 0.0316  | -0.7631   | 0.9904    | -0.6063     | 1.00  |
| <sup>2</sup> IM2 <sub>B</sub>    | Gas     | 1.0002 | -0.0075 | -0.3084   | 0.4569    | -0.1413     | 1.00  |
|                                  | Solvent | 1.2209 | -0.0073 | -0.3951   | 0.1377    | 0.0437      | 1.00  |
| <sup>2</sup> TS3 <sub>Cyc</sub>  | Gas     | 1.0163 | -0.0036 | -0.0679   | 0.0007    | 0.0545      | 1.00  |
|                                  | Solvent | 1.2160 | -0.0114 | -0.2423   | 0.0033    | 0.0344      | 1.00  |
| <sup>2</sup> IM3 <sub>Cyc</sub>  | Gas     | 1.0242 | -0.0035 | -0.0679   | 0.0008    | 0.0464      | 1.00  |
|                                  | Solvent | 1.2193 | -0.0120 | -0.2419   | 0.0046    | 0.0300      | 1.00  |
| <sup>2</sup> P <sub>Cyc</sub>    | Gas     | 1.0228 | -0.0033 | -0.0686   | 0.0049    | 0.0441      | 1.00  |
|                                  | Solvent | 1.1635 | -0.0034 | -0.2138   | 0.0016    | 0.0520      | 1.00  |

**Table S6:** Group spin densities of optimized geometries of the OxyB model with substrate as calculated at the UB3LYP level of theory in the quartet spin state.

| System                           |         | Fe     | O      | Porphyrin | Substrate | Amino Acids | Total |
|----------------------------------|---------|--------|--------|-----------|-----------|-------------|-------|
| <sup>4</sup> Re                  | Gas     | 1.2070 | 0.8131 | 0.2712    | 0.0043    | 0.7045      | 3.00  |
|                                  | Solvent | 1.3688 | 0.7591 | 0.2406    | -0.0051   | 0.6367      | 3.00  |
| <sup>4</sup> TS1 <sub>HA,A</sub> | Gas     | 1.5453 | 0.4268 | 0.3529    | 0.1645    | 0.5105      | 3.00  |
|                                  | Solvent | 1.6943 | 0.4635 | 0.4971    | 0.0919    | 0.2532      | 3.00  |
| <sup>4</sup> IM1 <sub>A</sub>    | Gas     | 1.6463 | 0.2271 | -0.0936   | 0.8026    | 0.4176      | 3.00  |
|                                  | Solvent | 1.0761 | 0.1318 | 0.1891    | 0.9903    | 0.6126      | 3.00  |
| <sup>4</sup> TS2 <sub>HA,B</sub> | Gas     | 1.0409 | 0.0607 | 0.3531    | 1.0028    | 0.5426      | 3.00  |
|                                  | Solvent | 1.1293 | 0.0593 | 0.3024    | 0.9951    | 0.5139      | 3.00  |
| <sup>4</sup> IM2 <sub>B</sub>    | Gas     | 0.9907 | 0.0105 | 0.1468    | 1.5642    | 0.2878      | 3.00  |
|                                  | Solvent | 1.1293 | 0.0593 | 0.3024    | 0.9951    | 0.5139      | 3.00  |
| <sup>4</sup> IM3 <sub>Cyc</sub>  | Gas     | 1.1510 | 0.0039 | 0.1055    | 1.6671    | 0.0724      | 3.00  |
|                                  | Solvent | 1.1942 | 0.0125 | -0.0927   | 1.8383    | 0.0477      | 3.00  |

**Table S7:** Group charges of optimized geometries of the OxyB model with substrate as calculated at the UB3LYP level of theory in the doublet spin state.

| System                           |         | Fe      | O       | Porphyrin | Substrate | Amino Acids | Total |
|----------------------------------|---------|---------|---------|-----------|-----------|-------------|-------|
| <sup>2</sup> Re                  | Gas     | 0.4843  | -0.5550 | -0.8486   | -0.1390   | -0.9417     | -2.00 |
|                                  | Solvent | -4.3476 | 0.1133  | 2.8297    | -0.3311   | -0.2641     | -2.00 |
| <sup>2</sup> TS1 <sub>HA,A</sub> | Gas     | 0.4441  | -0.7426 | -0.6005   | -0.1803   | -0.9207     | -2.00 |
|                                  | Solvent | -4.7728 | 0.0557  | 3.1265    | -0.1849   | -0.2245     | -2.00 |
| <sup>2</sup> IM1 <sub>A</sub>    | Gas     | 0.3422  | -0.8224 | -0.7775   | 0.2058    | -0.9481     | -2.00 |
|                                  | Solvent | -3.9243 | 0.0558  | 2.1800    | 0.0636    | -0.3751     | -2.00 |
| <sup>2</sup> TS2 <sub>HA,B</sub> | Gas     | 0.3749  | -0.8643 | -0.8295   | 0.2607    | -0.9418     | -2.00 |
|                                  | Solvent | -4.3177 | 0.0250  | 2.6434    | -0.0871   | -0.2636     | -2.00 |
| <sup>2</sup> IM2 <sub>B</sub>    | Gas     | 0.2356  | -0.8198 | -1.0398   | 0.5629    | -0.9390     | -2.00 |
|                                  | Solvent | -3.2828 | 0.2229  | 1.6146    | 0.1191    | -0.6737     | -2.00 |
| <sup>2</sup> TS3 <sub>Cyc</sub>  | Gas     | 0.1947  | -0.7972 | -1.2190   | 0.9165    | -1.0950     | -2.00 |
|                                  | Solvent | -2.8341 | 0.1584  | 1.4848    | 0.0871    | -0.8962     | -2.00 |
| <sup>2</sup> IM3 <sub>Cyc</sub>  | Gas     | 0.1964  | -0.7808 | -1.1921   | 0.9029    | -1.1264     | -2.00 |
|                                  | Solvent | -2.5247 | 0.2715  | 1.2944    | -0.1185   | -0.9227     | -2.00 |
| <sup>2</sup> P <sub>Cyc</sub>    | Gas     | 0.1777  | -0.7824 | -1.2228   | 0.7053    | -0.8777     | -2.00 |
|                                  | Solvent | -1.5205 | -0.1834 | -0.2376   | 0.7025    | -0.7610     | -2.00 |



**Table S8:** Group charges of optimized geometries of the OxyB model with substrate as calculated at the UB3LYP level of theory in the quartet spin state.

| System                           |         | Fe      | O       | Porphyrin | Substrate | Amino Acids | Total |
|----------------------------------|---------|---------|---------|-----------|-----------|-------------|-------|
| <sup>4</sup> Re                  | Gas     | 0.4796  | -0.4708 | -0.8893   | -0.0944   | -1.0251     | -2.00 |
|                                  | Solvent | -4.2089 | 0.2466  | 2.8430    | -0.0033   | -0.8773     | -2.00 |
| <sup>4</sup> TS1 <sub>HA,A</sub> | Gas     | 0.4227  | -0.7400 | -0.6755   | -0.1318   | -0.8755     | -2.00 |
|                                  | Solvent | -4.7427 | 0.0645  | 3.0119    | -0.1527   | -0.1810     | -2.00 |
| <sup>4</sup> IM1 <sub>A</sub>    | Gas     | 0.4073  | -0.7747 | -1.0039   | 0.2274    | -0.8561     | -2.00 |
|                                  | Solvent | -3.9193 | 0.0567  | 2.1733    | 0.0655    | -0.3762     | -2.00 |
| <sup>4</sup> TS2 <sub>HA,B</sub> | Gas     | 0.3671  | -0.8630 | -0.8460   | 0.2607    | -0.9189     | -2.00 |
|                                  | Solvent | -4.5123 | 0.0338  | 2.7081    | -0.0437   | -0.1859     | -2.00 |
| <sup>4</sup> IM2 <sub>B</sub>    | Gas     | 0.2347  | -0.8175 | -1.0629   | 0.5781    | -0.9324     | -2.00 |
|                                  | Solvent | -4.5123 | 0.0338  | 2.7081    | -0.0437   | -0.1859     | -2.00 |
| <sup>4</sup> IM3 <sub>Cyc</sub>  | Gas     | 0.2780  | -0.8236 | -1.0494   | 0.6879    | -1.0929     | -2.00 |
|                                  | Solvent | -3.5127 | 0.1854  | 1.7238    | 0.5850    | -0.9815     | -2.00 |

**Table S9:** Absolute (free) energies (in au) of optimized geometries of the OxyB model with substrate in binding position B for the cyclization reaction as calculated at the UB3LYP level of theory in the doublet spin state.

| System                           | BS1          |              |              | BS2 + Solv   |              |              |
|----------------------------------|--------------|--------------|--------------|--------------|--------------|--------------|
|                                  | E            | E+ZPE        | G            | E            | E+ZPE        | G            |
| <sup>2</sup> Re                  | -7749.328659 | -7747.223033 | -7747.430764 | -7751.422483 | -7749.316857 | -7749.524588 |
| <sup>2</sup> TS1 <sub>HA,B</sub> | -7749.311811 | -7747.213208 | -7747.420178 | -7751.407693 | -7749.309090 | -7749.516060 |
| <sup>2</sup> IM1 <sub>B</sub>    | -7749.332748 | -7747.229918 | -7747.435029 | -7751.427488 | -7749.324658 | -7749.529769 |
| <sup>2</sup> TS2 <sub>HA,A</sub> | -7749.329838 | -7747.232224 | -7747.439677 | -7751.414851 | -7749.317237 | -7749.524690 |
| <sup>2</sup> IM2'                | -7749.333762 | -7747.232675 | -7747.442066 | -7751.428675 | -7749.327588 | -7749.536979 |
| <sup>2</sup> IM3 <sub>Cyc</sub>  | -7749.330201 | -7747.223070 | -7747.431964 | -7751.418564 | -7749.311433 | -7749.520327 |

**Table S10:** Relative (free) energies (in kcal mol<sup>-1</sup>) of optimized geometries of the OxyB model with substrate in binding position B for the cyclization reaction as calculated at the UB3LYP level of theory in the doublet spin state.

| System                           | BS1   |        |       | BS2 + Solv |        |       |
|----------------------------------|-------|--------|-------|------------|--------|-------|
|                                  | ΔE    | ΔE+ZPE | ΔG    | ΔE         | ΔE+ZPE | ΔG    |
| <sup>2</sup> Re                  | 0.00  | 0.00   | 0.00  | 0.00       | 0.00   | 0.00  |
| <sup>2</sup> TS1 <sub>HA,B</sub> | 10.57 | 6.17   | 6.64  | 9.28       | 4.87   | 5.35  |
| <sup>2</sup> IM1 <sub>B</sub>    | -2.57 | -4.32  | -2.68 | -3.14      | -4.89  | -3.25 |
| <sup>2</sup> TS2 <sub>HA,A</sub> | -0.74 | -5.77  | -5.59 | 4.79       | -0.24  | -0.06 |
| <sup>2</sup> IM2'                | -3.20 | -6.05  | -7.09 | -3.89      | -6.73  | -7.78 |
| <sup>2</sup> IM3 <sub>Cyc</sub>  | -0.97 | -0.02  | -0.75 | 2.46       | 3.40   | 2.67  |

**Table S11:** Group spin densities of optimized geometries of the OxyB model with substrate in binding position B as calculated at the UB3LYP level of theory in the doublet spin state.

| System                           |         | Fe      | O       | Porphyrin | Substrate | Amino Acids | Total |
|----------------------------------|---------|---------|---------|-----------|-----------|-------------|-------|
| <sup>2</sup> Re                  | Gas     | 1.3992  | 0.7158  | -0.3133   | 0.0066    | -0.8083     | 1.00  |
|                                  | Solvent | 1.7694  | 0.6698  | -0.7538   | -0.0188   | -0.6667     | 1.00  |
| <sup>2</sup> TS1 <sub>HA,B</sub> | Gas     | 1.8162  | 0.3873  | -0.4966   | -0.1528   | -0.5541     | 1.00  |
|                                  | Solvent | 2.1232  | 0.3713  | -1.0403   | -0.2318   | -0.2224     | 1.00  |
| <sup>2</sup> IM1 <sub>B</sub>    | Gas     | 0.9902  | 0.0955  | -0.4745   | 0.9817    | -0.5928     | 1.00  |
| <sup>2</sup> TS2 <sub>HA,A</sub> | Gas     | 0.9641  | 0.0409  | 0.5004    | -0.9893   | 0.4840      | 1.00  |
| <sup>2</sup> IM2'                | Gas     | -1.4383 | 0.0137  | 0.4826    | 1.1734    | 0.7686      | 1.00  |
|                                  | Solvent | -1.2365 | 0.0243  | 0.7629    | 1.4795    | -0.0302     | 1.00  |
| <sup>2</sup> IM3 <sub>Cyc</sub>  | Gas     | 1.0242  | -0.0035 | -0.0679   | 0.0008    | 0.0464      | 1.00  |
|                                  | Solvent | 1.2193  | -0.0120 | -0.2419   | 0.0046    | 0.0300      | 1.00  |

**Table S12:** Group charges of optimized geometries of the OxyB model with substrate in binding position B as calculated at the UB3LYP level of theory in the doublet spin state.

| System                           |         | Fe      | O       | Porphyrin | Substrate | Amino Acids | Total |
|----------------------------------|---------|---------|---------|-----------|-----------|-------------|-------|
| <sup>2</sup> Re                  | Gas     | 0.4843  | -0.5550 | -0.8486   | -0.1390   | -0.9417     | -2.00 |
|                                  | Solvent | -4.3476 | 0.1133  | 2.8297    | -0.3311   | -0.2641     | -2.00 |
| <sup>2</sup> TS1 <sub>HA,B</sub> | Gas     | 0.5150  | -0.7538 | -0.7429   | -0.0827   | -0.9356     | -2.00 |
|                                  | Solvent | -5.5169 | -0.0326 | 3.7905    | -0.0727   | -0.1683     | -2.00 |
| <sup>2</sup> IM1 <sub>B</sub>    | Gas     | 0.3471  | -0.7794 | -0.8679   | -0.1479   | -0.5518     | -2.00 |
| <sup>2</sup> TS2 <sub>HA,A</sub> | Gas     | 0.2962  | -0.8449 | -0.7170   | -0.3220   | -0.4123     | -2.00 |
| <sup>2</sup> IM2'                | Gas     | 0.4768  | -0.8344 | -0.8061   | -0.2668   | -0.5694     | -2.00 |
|                                  | Solvent | 0.4768  | -0.8344 | -0.8061   | -0.2668   | -0.5694     | -2.00 |
| <sup>2</sup> IM3 <sub>Cyc</sub>  | Gas     | 0.1964  | -0.7808 | -1.1921   | 0.9029    | -1.1264     | -2.00 |
|                                  | Solvent | -2.5247 | 0.2715  | 1.2944    | -0.1185   | -0.9227     | -2.00 |

**Cartesian coordinates:**

**<sup>2</sup>Re**

|   |             |             |             |
|---|-------------|-------------|-------------|
| C | 24.97738700 | 5.77869200  | 35.67742100 |
| S | 24.16990400 | 4.35159000  | 34.85881900 |
| C | 25.29048300 | 3.02055300  | 35.43227500 |
| H | 24.31852900 | 6.64346900  | 35.55293200 |
| H | 25.40446600 | 3.04994900  | 36.52233200 |
| H | 24.84653400 | 2.06794800  | 35.12902600 |
| H | 26.26984400 | 3.11957200  | 34.95265200 |
| H | 25.93597500 | 5.99659300  | 35.19470100 |
| H | 21.08936100 | 2.00473000  | 34.71908100 |
| C | 20.69882100 | 1.67818300  | 35.69103600 |
| C | 20.05621900 | 2.85088500  | 36.41718000 |
| O | 19.04095400 | 2.69077700  | 37.11114300 |
| C | 21.84648700 | 1.03520500  | 36.50019200 |
| C | 21.45995800 | 0.55605900  | 37.90183700 |
| C | 20.49288200 | -0.61999400 | 37.89035700 |
| H | 22.37834500 | 0.25382700  | 38.42234800 |
| H | 19.91654900 | 0.93661100  | 35.51518200 |
| H | 21.02819000 | 1.37275500  | 38.49371500 |
| H | 22.67419000 | 1.74620000  | 36.60061100 |
| H | 22.22121300 | 0.17966600  | 35.92819400 |
| H | 19.88625300 | -0.21952000 | 39.83347200 |
| O | 20.23699800 | -1.28471900 | 36.89998100 |
| N | 19.95316500 | -0.95337100 | 39.13484700 |
| H | 19.12879400 | -1.54259800 | 39.07284200 |
| N | 20.68268400 | 4.04429600  | 36.27324600 |
| C | 20.28659100 | 5.26451400  | 36.96753400 |
| H | 19.86533600 | 5.97556000  | 36.24186600 |
| C | 21.45971100 | 5.91460300  | 37.71305900 |
| H | 21.10694500 | 6.86935300  | 38.12732100 |
| C | 22.05331900 | 5.03891800  | 38.81859600 |
| H | 19.48549200 | 4.98939500  | 37.65849900 |
| H | 22.33188700 | 4.05398600  | 38.43018100 |
| H | 22.24566700 | 6.16770500  | 36.98981000 |
| H | 21.56841300 | 4.06554100  | 35.77137800 |
| H | 22.97134900 | 5.48062800  | 39.21638200 |
| H | 21.33733800 | 4.88763900  | 39.63615400 |
| C | 15.45629600 | 3.06647200  | 36.76558500 |
| C | 15.58298000 | 3.70828100  | 38.13557900 |
| O | 14.63404000 | 4.27459300  | 38.68997300 |
| C | 14.66757500 | 1.73181600  | 36.82509000 |
| C | 13.21288600 | 1.82228800  | 37.32812600 |
| C | 12.30934300 | 2.65831100  | 36.41169300 |
| C | 12.61998400 | 0.41931400  | 37.53194200 |
| H | 13.26461200 | -0.19707100 | 38.17304100 |
| H | 11.64154100 | 0.49208100  | 38.01870300 |
| H | 12.50244500 | -0.10944900 | 36.57408700 |
| H | 12.19292600 | 2.18712200  | 35.42376700 |
| H | 11.32818000 | 2.76781600  | 36.88225700 |
| H | 12.70654300 | 3.66945800  | 36.26450200 |
| H | 14.93399500 | 3.77743400  | 36.11688200 |
| H | 13.21097700 | 2.32320800  | 38.30050200 |
| H | 15.22817700 | 1.03338900  | 37.46296000 |
| H | 14.68161900 | 1.29680200  | 35.81441300 |
| N | 16.79914300 | 3.61188700  | 38.75088600 |
| C | 16.92611800 | 3.90224600  | 40.17612800 |
| C | 16.71076700 | 5.38251100  | 40.53989600 |
| O | 16.47207600 | 5.70449200  | 41.70494400 |
| C | 18.27673500 | 3.40818100  | 40.70792200 |
| H | 17.58496000 | 3.18788200  | 38.25674800 |
| H | 16.12040300 | 3.38458000  | 40.70988700 |

|   |             |             |             |
|---|-------------|-------------|-------------|
| H | 19.11039800 | 3.88007700  | 40.17717600 |
| H | 18.36871200 | 3.64007500  | 41.77134500 |
| H | 18.35812900 | 2.32367100  | 40.58056100 |
| N | 16.82200000 | 6.28441400  | 39.52795700 |
| C | 16.46286600 | 7.68145500  | 39.69605000 |
| C | 14.96136000 | 8.02939900  | 39.78736800 |
| O | 14.65014400 | 9.20388900  | 39.97634100 |
| H | 16.89525700 | 5.90437600  | 38.59429500 |
| H | 16.90948300 | 8.05507000  | 40.62013000 |
| H | 16.88852400 | 8.25787300  | 38.86955100 |
| N | 14.08834600 | 7.00417300  | 39.65103600 |
| C | 12.66062500 | 7.16302200  | 39.89354000 |
| C | 12.24097000 | 6.45256300  | 41.19438000 |
| O | 12.06044600 | 7.08541500  | 42.24292300 |
| H | 14.42006200 | 6.06038900  | 39.45874100 |
| H | 12.45813400 | 8.22865900  | 39.99907400 |
| N | 12.15810900 | 5.10738400  | 41.08764400 |
| C | 11.55549700 | 4.27665100  | 42.13020100 |
| C | 12.26197900 | 4.33748700  | 43.49179200 |
| O | 11.63895700 | 4.08645700  | 44.51830600 |
| C | 11.51544800 | 2.80684800  | 41.64922400 |
| C | 10.87262800 | 2.55904600  | 40.24646900 |
| O | 11.05506400 | 3.44433700  | 39.35652300 |
| O | 10.28357100 | 1.46432200  | 40.11073000 |
| H | 11.99576100 | 4.66689900  | 40.15814800 |
| H | 10.53301900 | 4.61974200  | 42.33275200 |
| H | 10.99115500 | 2.20974400  | 42.39837400 |
| H | 12.54607400 | 2.42752500  | 41.59498700 |
| N | 13.60391300 | 4.61045100  | 43.47650800 |
| C | 14.38063500 | 4.71141900  | 44.70190200 |
| C | 14.74616200 | 6.16515700  | 45.06811600 |
| O | 15.72386700 | 6.40671400  | 45.78904500 |
| C | 15.62296100 | 3.80909600  | 44.68865600 |
| C | 16.08032100 | 3.43570700  | 46.10157000 |
| H | 13.72434100 | 4.35276200  | 45.50306000 |
| H | 14.04176800 | 4.86630500  | 42.59937400 |
| H | 16.43518700 | 4.25975700  | 44.10951700 |
| H | 15.34714200 | 2.87193900  | 44.18749600 |
| O | 15.31038700 | 3.39970800  | 47.05617500 |
| N | 17.39353100 | 3.09183200  | 46.21144000 |
| H | 17.70352000 | 2.73068600  | 47.10259800 |
| H | 18.02958300 | 2.99871900  | 45.42837000 |
| N | 13.90345000 | 7.11643400  | 44.60944400 |
| C | 14.03041600 | 8.52640800  | 44.94935500 |
| H | 13.07453600 | 8.86500900  | 45.37244900 |
| C | 14.40055800 | 9.40829900  | 43.74774100 |
| C | 15.81671000 | 9.16134300  | 43.22128400 |
| H | 14.79019300 | 8.59495100  | 45.73293500 |
| H | 13.67565300 | 9.23499900  | 42.94349100 |
| H | 15.94109600 | 8.11219600  | 42.93123400 |
| H | 16.00789500 | 9.77732800  | 42.33615800 |
| H | 13.17670500 | 6.86451900  | 43.94183200 |
| N | 31.78755500 | 0.55069800  | 44.37032700 |
| C | 31.94822800 | 0.68906700  | 42.93096800 |
| C | 30.65774900 | 1.21330500  | 42.30015100 |
| O | 29.58640300 | 1.14940400  | 42.90027000 |
| H | 30.88559600 | 0.11070500  | 44.56998000 |
| H | 32.77983400 | 1.37404100  | 42.71154700 |
| N | 30.74783100 | 1.72185800  | 41.03901600 |
| C | 29.54852700 | 1.97845900  | 40.24169600 |
| C | 29.02654500 | 0.65564400  | 39.62557000 |
| O | 29.73985700 | -0.34861100 | 39.57551200 |
| C | 30.08831700 | 2.91742300  | 39.14598900 |

|    |             |             |             |    |             |             |             |
|----|-------------|-------------|-------------|----|-------------|-------------|-------------|
| C  | 31.47876500 | 2.32080400  | 38.85699500 | O  | 21.89702600 | 4.08260600  | 45.89422800 |
| C  | 31.97117300 | 1.82107100  | 40.23401500 | C  | 23.92161100 | -1.71742400 | 41.95661000 |
| H  | 31.38108000 | 1.47098000  | 38.17528900 | N  | 24.95573200 | -0.75097800 | 41.64149200 |
| H  | 28.77457400 | 2.42978900  | 40.86516900 | C  | 25.99407500 | -0.31221100 | 42.40167400 |
| H  | 32.67119000 | 2.53244800  | 40.69372300 | O  | 26.73717700 | 0.58230200  | 42.00184500 |
| H  | 32.47453100 | 0.85123400  | 40.15086100 | C  | 26.21308000 | -0.90786300 | 43.81172800 |
| H  | 32.17122700 | 3.04065200  | 38.40825600 | N  | 27.63276600 | -0.73796700 | 44.11707300 |
| H  | 30.17535200 | 3.93472300  | 39.54613000 | C  | 28.28913700 | -1.48924700 | 45.02256100 |
| H  | 29.43692400 | 2.95062400  | 38.26889200 | O  | 29.47497000 | -1.39108600 | 45.32983800 |
| N  | 27.78909300 | 0.72563000  | 39.08855300 | C  | 25.26971000 | -0.21876300 | 44.79438400 |
| C  | 27.13614200 | -0.47794600 | 38.58898300 | C  | 25.22359400 | 1.18040000  | 44.85809800 |
| C  | 25.77143100 | -0.16836900 | 37.96193400 | C  | 24.30684600 | 1.82833700  | 45.67431200 |
| O  | 24.86167400 | 0.38460100  | 38.92380000 | C  | 23.39904100 | 1.08988600  | 46.45051500 |
| C  | 25.14190300 | -1.43334900 | 37.38510700 | C  | 23.47066500 | -0.30922300 | 46.43604500 |
| H  | 27.00411700 | -1.20617200 | 39.40018000 | C  | 24.39609200 | -0.94913200 | 45.61001800 |
| H  | 24.18146000 | -1.19889100 | 36.91400400 | O  | 22.45402500 | 1.68861300  | 47.21834600 |
| H  | 25.79524400 | -1.88253000 | 36.62762700 | C  | 22.59562800 | -1.22771200 | 41.28261900 |
| H  | 27.19999100 | 1.54271700  | 39.26414700 | C  | 21.88434100 | -0.15369500 | 42.10180700 |
| H  | 25.91574800 | 0.57144000  | 37.16142500 | C  | 20.66169700 | -0.43644600 | 42.72178200 |
| H  | 24.97160000 | -2.16775000 | 38.17871200 | C  | 20.02517000 | 0.51779300  | 43.51506700 |
| H  | 25.09245700 | 1.35193000  | 39.02303100 | C  | 20.59989200 | 1.77806200  | 43.74075100 |
| C  | 23.46764300 | 8.82321800  | 44.89458200 | C  | 21.81041100 | 2.06555000  | 43.09100400 |
| S  | 22.36377500 | 8.22818800  | 46.21417000 | C  | 22.43695000 | 1.12330000  | 42.28240100 |
| H  | 23.53269900 | 9.91411400  | 44.95727500 | O  | 19.97590500 | 2.67711900  | 44.54097200 |
| H  | 24.46493100 | 8.38313700  | 44.97829100 | Cl | 18.48987300 | 0.11767400  | 44.27215100 |
| C  | 22.90295900 | 5.97810500  | 42.71756600 | C  | 24.29314000 | -3.12849700 | 41.43346500 |
| H  | 23.09974400 | 6.00505100  | 41.65126100 | O  | 24.96440200 | -3.24098800 | 40.41760700 |
| C  | 25.54331600 | 5.24826400  | 46.69513800 | C  | 23.88967400 | -4.33389800 | 42.21608700 |
| H  | 26.59173800 | 5.05326200  | 46.89836600 | O  | 21.77591000 | -2.36602200 | 41.05865900 |
| C  | 21.55110200 | 5.65195300  | 49.40979500 | C  | 22.97173100 | -4.30670900 | 43.28090000 |
| H  | 21.33836700 | 5.58706200  | 50.47262600 | C  | 22.64544900 | -5.46682800 | 43.97465200 |
| C  | 18.90885900 | 6.39452700  | 45.42747000 | C  | 23.24119800 | -6.68099400 | 43.61532000 |
| H  | 17.84844400 | 6.53684300  | 45.24029600 | C  | 24.15512400 | -6.72750800 | 42.55400100 |
| C  | 23.96291300 | 5.66385600  | 43.55839700 | C  | 24.46730900 | -5.56393300 | 41.86301900 |
| C  | 25.31709500 | 5.37679000  | 43.10280600 | O  | 22.89602700 | -7.79228800 | 44.33160400 |
| C  | 26.05117500 | 5.21220400  | 44.24293100 | H  | 23.77911500 | -1.74459000 | 43.03777700 |
| C  | 25.16404300 | 5.37030200  | 45.36652100 | H  | 24.95559200 | -0.36097100 | 40.68974800 |
| C  | 25.76372800 | 5.26927700  | 41.67361000 | H  | 25.98563900 | -1.98085600 | 43.80383600 |
| H  | 26.85272300 | 5.39444700  | 41.63377700 | H  | 28.14561200 | -0.01201400 | 43.60701000 |
| H  | 25.34502700 | 6.07941500  | 41.06669300 | H  | 25.89921400 | 1.76606100  | 44.24094400 |
| C  | 25.38701800 | 3.94002600  | 40.98255900 | H  | 24.26077100 | 2.90995200  | 45.69196300 |
| H  | 25.95320200 | 3.09758900  | 41.39364600 | H  | 22.77587400 | -0.87714200 | 47.04756400 |
| H  | 24.32610500 | 3.71721100  | 41.17175400 | H  | 24.42370800 | -2.03800500 | 45.58867300 |
| C  | 25.55553800 | 3.99788900  | 39.44288700 | H  | 22.32842600 | 2.61604200  | 46.90878600 |
| O  | 25.78311400 | 2.88304100  | 38.85121100 | H  | 22.90538500 | -0.80551300 | 40.31804000 |
| O  | 25.42450900 | 5.10565100  | 38.88517800 | H  | 20.21277400 | -1.41565600 | 42.59955600 |
| C  | 24.68201800 | 5.31287900  | 47.78509500 | H  | 22.26075000 | 3.04096500  | 43.24406200 |
| C  | 25.09687300 | 5.16386900  | 49.15592700 | H  | 23.37481800 | 1.38393400  | 41.80337200 |
| C  | 23.97278300 | 5.27276100  | 49.91961900 | H  | 20.64313400 | 3.29577000  | 44.94044800 |
| C  | 22.87515100 | 5.48976900  | 49.01348100 | H  | 21.15475100 | -2.11852100 | 40.34304700 |
| C  | 20.48147500 | 5.87333600  | 48.55807200 | H  | 22.47972300 | -3.38152100 | 43.55876800 |
| C  | 19.10469700 | 5.98856000  | 48.97672100 | H  | 21.93060100 | -5.45200400 | 44.79108200 |
| C  | 18.36126200 | 6.18080500  | 47.85306200 | H  | 24.61650000 | -7.67405100 | 42.27482800 |
| C  | 19.29024500 | 6.19751000  | 46.74900800 | H  | 25.16787300 | -5.58023300 | 41.03451100 |
| C  | 19.78376000 | 6.41497500  | 44.35578300 | H  | 23.37705800 | -8.55413700 | 43.97213500 |
| C  | 19.38328800 | 6.63404500  | 42.99046100 | H  | 23.05476900 | 8.55770000  | 43.91442000 |
| C  | 20.50926600 | 6.53685200  | 42.23062800 | H  | 14.29276000 | 10.45976200 | 44.05277800 |
| C  | 21.60023900 | 6.24219000  | 43.12586100 | H  | 16.57279500 | 9.39292100  | 43.98272700 |
| N  | 23.88916800 | 5.63968400  | 44.92981200 | H  | 32.49782700 | -0.08534700 | 44.72660600 |
| N  | 23.32669800 | 5.51027700  | 47.71994500 | H  | 32.17930200 | -0.25111600 | 42.38889800 |
| N  | 20.57353300 | 6.00921500  | 47.19286300 | H  | 27.63868600 | -2.25622100 | 45.49247900 |
| N  | 21.14673000 | 6.19977900  | 44.42285000 | H  | 20.61009400 | 6.63525200  | 41.15769800 |
| Fe | 22.20812000 | 5.69775400  | 46.05484800 | H  | 18.36081800 | 6.79749900  | 42.67720500 |

|                                       |             |             |             |   |             |            |             |
|---------------------------------------|-------------|-------------|-------------|---|-------------|------------|-------------|
| H                                     | 17.29080600 | 6.28440100  | 47.73101000 | N | 16.85625800 | 3.65919000 | 38.84980500 |
| H                                     | 18.76858700 | 5.91379200  | 50.00338200 | C | 17.02444100 | 4.03259100 | 40.25185300 |
| H                                     | 23.87808200 | 5.20928300  | 50.99633800 | C | 16.76336600 | 5.52324000 | 40.53352100 |
| H                                     | 26.11700100 | 4.98926900  | 49.47358100 | O | 16.53123300 | 5.91043100 | 41.67921300 |
| H                                     | 27.10705200 | 4.98236900  | 44.32119700 | C | 18.41107900 | 3.61530300 | 40.75560800 |
| H                                     | 27.78786300 | -0.94689700 | 37.84171200 | H | 17.64519500 | 3.25482700 | 38.34372500 |
| H                                     | 25.12895700 | 5.56913300  | 36.74325700 | H | 16.25756500 | 3.51750500 | 40.84187700 |
| H                                     | 16.45022400 | 2.88149400  | 36.34262300 | H | 19.20521800 | 4.10092300 | 40.17897200 |
| H                                     | 12.09918100 | 6.75728400  | 39.04310100 | H | 18.53599300 | 3.88211600 | 41.80745100 |
| <b><sup>2</sup>Ts1<sub>HA,A</sub></b> |             |             |             | H | 18.53568400 | 2.53183900 | 40.66040800 |
| C                                     | 25.04372300 | 5.76066500  | 35.72395100 | N | 16.82190300 | 6.36563100 | 39.46603200 |
| S                                     | 24.21191700 | 4.35922700  | 34.88515600 | C | 16.42210700 | 7.75732900 | 39.56216400 |
| C                                     | 25.29946800 | 2.99858700  | 35.45188000 | C | 14.91165000 | 8.06103700 | 39.65456200 |
| H                                     | 24.40999100 | 6.64296500  | 35.59194800 | O | 14.56087200 | 9.23155800 | 39.78910000 |
| H                                     | 25.41215400 | 3.02154500  | 36.54233100 | H | 16.90586600 | 5.93605300 | 38.55500000 |
| H                                     | 24.83257400 | 2.05846800  | 35.14404000 | H | 16.86702500 | 8.19514900 | 40.45855800 |
| H                                     | 26.28152800 | 3.07601200  | 34.97373300 | H | 16.81815300 | 8.30104400 | 38.69948300 |
| H                                     | 26.01501800 | 5.95489200  | 35.25679800 | N | 14.07092400 | 7.00187900 | 39.57426000 |
| H                                     | 21.07307500 | 1.99584200  | 34.77130500 | C | 12.63983300 | 7.13147400 | 39.81144000 |
| C                                     | 20.67177100 | 1.69102700  | 35.74605800 | C | 12.24095900 | 6.46058600 | 41.13833700 |
| C                                     | 20.07321100 | 2.89255600  | 36.46263700 | O | 12.05342900 | 7.12202000 | 42.16630200 |
| O                                     | 19.04991800 | 2.77523700  | 37.15361600 | H | 14.43225500 | 6.05862200 | 39.43934200 |
| C                                     | 21.79381700 | 1.00537300  | 36.55593600 | H | 12.40984300 | 8.19472300 | 39.87764500 |
| C                                     | 21.39899200 | 0.55832500  | 37.96567400 | N | 12.18510600 | 5.10909300 | 41.08283900 |
| C                                     | 20.37191500 | -0.56714100 | 37.98518100 | C | 11.61984300 | 4.30931500 | 42.16891700 |
| H                                     | 22.30792300 | 0.21946700  | 38.47872300 | C | 12.36945600 | 4.41845800 | 43.50717400 |
| H                                     | 19.86091900 | 0.97932000  | 35.57761200 | O | 11.78214200 | 4.17458900 | 44.55585700 |
| H                                     | 21.01551200 | 1.40086100  | 38.55458800 | C | 11.57867500 | 2.82315300 | 41.74614400 |
| H                                     | 22.65370900 | 1.67901600  | 36.64460600 | C | 10.86825900 | 2.52837900 | 40.39273600 |
| H                                     | 22.12636900 | 0.12877500  | 35.98945700 | O | 11.01632300 | 3.35059000 | 39.44672500 |
| H                                     | 19.91743900 | -0.18110800 | 39.97338700 | O | 10.24311900 | 1.43919900 | 40.34155900 |
| O                                     | 20.03058300 | -1.19709000 | 36.99653200 | H | 12.03566300 | 4.64149900 | 40.17285500 |
| N                                     | 19.87706500 | -0.88952300 | 39.24717700 | H | 10.60200400 | 4.65251900 | 42.39234300 |
| H                                     | 19.01703600 | -1.42736600 | 39.22668300 | H | 11.10350300 | 2.24875500 | 42.54409900 |
| N                                     | 20.73865300 | 4.06368600  | 36.31180400 | H | 12.60964300 | 2.45501500 | 41.64739800 |
| C                                     | 20.35935500 | 5.30831500  | 36.97162400 | N | 13.69989700 | 4.72658000 | 43.44038900 |
| H                                     | 19.95470100 | 6.00640700  | 36.22394300 | C | 14.52099100 | 4.87805400 | 44.63295200 |
| C                                     | 21.53632600 | 5.96087300  | 37.70838500 | C | 14.81716100 | 6.35390300 | 44.97507700 |
| H                                     | 21.19648200 | 6.93535300  | 38.08614800 | O | 15.78282000 | 6.65388200 | 45.68934600 |
| C                                     | 22.10086400 | 5.11312800  | 38.85024200 | C | 15.80756700 | 4.04106100 | 44.56232700 |
| H                                     | 19.54899900 | 5.06476000  | 37.66349300 | C | 16.32526600 | 3.64531700 | 45.94886400 |
| H                                     | 22.35547000 | 4.10710900  | 38.50105300 | H | 13.92289900 | 4.49057600 | 45.46543900 |
| H                                     | 22.33418300 | 6.17539900  | 36.98597000 | H | 14.10128900 | 4.96870700 | 42.54227000 |
| H                                     | 21.62481500 | 4.05798800  | 35.81017900 | H | 16.58089600 | 4.54803700 | 43.97774500 |
| H                                     | 23.02761900 | 5.54568100  | 39.23777200 | H | 15.56662200 | 3.10716700 | 44.03729000 |
| H                                     | 21.37556700 | 5.01148100  | 39.66720000 | O | 15.59875600 | 3.61946400 | 46.93938300 |
| C                                     | 15.48515900 | 2.97960200  | 36.93045100 | N | 17.63273000 | 3.27704300 | 45.99133300 |
| C                                     | 15.61893400 | 3.67199200  | 38.27572800 | H | 17.97407100 | 2.90639300 | 46.86730500 |
| O                                     | 14.65881800 | 4.20965700  | 38.84297000 | H | 18.24937100 | 3.18152000 | 45.18698400 |
| C                                     | 14.74612300 | 1.62143800  | 37.04642500 | N | 13.93198200 | 7.26036100 | 44.50463100 |
| C                                     | 13.28557700 | 1.68101200  | 37.53683100 | C | 14.00277600 | 8.68064500 | 44.81709800 |
| C                                     | 12.35640500 | 2.42031700  | 36.56426600 | H | 13.03868500 | 8.98723000 | 45.24589100 |
| C                                     | 12.75164900 | 0.26821100  | 37.81988200 | C | 14.32089600 | 9.55425700 | 43.59430100 |
| H                                     | 13.40776400 | -0.27544200 | 38.51256400 | C | 15.73894200 | 9.35638200 | 43.05215300 |
| H                                     | 11.75804200 | 0.32244400  | 38.27749800 | H | 14.76819100 | 8.79563500 | 45.58962500 |
| H                                     | 12.68026000 | -0.32568700 | 36.89661500 | H | 13.59290900 | 9.33621700 | 42.80377900 |
| H                                     | 12.27377100 | 1.88634400  | 35.60560000 | H | 15.90525200 | 8.30741800 | 42.78356500 |
| H                                     | 11.36366800 | 2.51414200  | 37.01364500 | H | 15.89183900 | 9.96006700 | 42.15109200 |
| H                                     | 12.71066200 | 3.43720200  | 36.35901700 | H | 13.20939300 | 6.96688300 | 43.85075400 |
| H                                     | 14.92659800 | 3.65076700  | 36.26930700 | N | 31.68420300 | 0.87937400 | 44.36283100 |
| H                                     | 13.25922300 | 2.23937500  | 38.47724500 | C | 31.87885000 | 0.91963900 | 42.92165000 |
| H                                     | 15.32782200 | 0.97321000  | 37.71731500 | C | 30.60556500 | 1.40177600 | 42.22458600 |
| H                                     | 14.78148100 | 1.14157300  | 36.05697000 | O | 29.51678000 | 1.37229500 | 42.79536500 |

|   |             |             |             |    |             |             |             |
|---|-------------|-------------|-------------|----|-------------|-------------|-------------|
| H | 30.79692900 | 0.41417600  | 44.57119000 | C  | 20.57575800 | 6.72551000  | 42.26754300 |
| H | 32.71716900 | 1.58784700  | 42.67871600 | C  | 21.60969900 | 6.27136500  | 43.16233400 |
| N | 30.73529100 | 1.83168200  | 40.93698500 | N  | 23.80138600 | 5.42309800  | 44.97892200 |
| C | 29.56361200 | 2.06251900  | 40.09219400 | N  | 23.12423300 | 5.02815600  | 47.72866100 |
| C | 29.04631600 | 0.72220500  | 39.51244300 | N  | 20.45540900 | 5.84905000  | 47.18975900 |
| O | 29.76863300 | -0.27625000 | 39.47696000 | N  | 21.12478500 | 6.19149600  | 44.44153400 |
| C | 30.14571200 | 2.94878300  | 38.97406700 | Fe | 22.09400200 | 5.53658500  | 46.06138200 |
| C | 31.54053300 | 2.33224100  | 38.75645800 | O  | 21.64913400 | 3.89076600  | 45.76216200 |
| C | 31.98506700 | 1.89399600  | 40.16986500 | C  | 23.89027300 | -1.71068800 | 41.95260500 |
| H | 31.45776500 | 1.45237900  | 38.11229300 | N  | 24.91926500 | -0.75776300 | 41.58690700 |
| H | 28.77710600 | 2.54938500  | 40.67156000 | C  | 26.00028600 | -0.34400900 | 42.29762100 |
| H | 32.67090900 | 2.62523400  | 40.61989200 | O  | 26.77372900 | 0.49633300  | 41.84188500 |
| H | 32.48898500 | 0.92113800  | 40.14792100 | C  | 26.22057200 | -0.88403900 | 43.72967100 |
| H | 32.25182900 | 3.02742500  | 38.29816600 | N  | 27.61984600 | -0.61726000 | 44.06416600 |
| H | 30.22612200 | 3.98264600  | 39.33085800 | C  | 28.30102700 | -1.30026000 | 45.00267200 |
| H | 29.52313300 | 2.94557700  | 38.07556200 | O  | 29.47112200 | -1.11899000 | 45.33443400 |
| N | 27.80434600 | 0.77327300  | 38.98250500 | C  | 25.21337800 | -0.23181400 | 44.67288000 |
| C | 27.14928000 | -0.45026500 | 38.53710900 | C  | 24.89577700 | 1.12355800  | 44.52278200 |
| C | 25.77280200 | -0.17376100 | 37.91894700 | C  | 23.93259100 | 1.72765600  | 45.31591800 |
| O | 24.86278700 | 0.39165700  | 38.87174200 | C  | 23.26090200 | 0.99099600  | 46.30544200 |
| C | 25.15141800 | -1.46249000 | 37.38721100 | C  | 23.59596400 | -0.35865700 | 46.49300900 |
| H | 27.03545900 | -1.14859600 | 39.37672000 | C  | 24.55496700 | -0.95818800 | 45.67523000 |
| H | 24.18062600 | -1.25172100 | 36.92601800 | O  | 22.29964900 | 1.54526600  | 47.08028300 |
| H | 25.79811800 | -1.92490700 | 36.63202000 | C  | 22.55803100 | -1.25970600 | 41.26795700 |
| H | 27.20637000 | 1.58110300  | 39.17256100 | C  | 21.86234100 | -0.12009500 | 41.99845900 |
| H | 25.90012500 | 0.54287800  | 37.09423300 | C  | 20.85319100 | -0.39879000 | 42.93163100 |
| H | 25.00150000 | -2.17600200 | 38.20397700 | C  | 20.24213800 | 0.62354700  | 43.64953500 |
| H | 25.10709400 | 1.35298300  | 38.98651600 | C  | 20.60804500 | 1.98915300  | 43.49181000 |
| C | 23.47423800 | 8.59889000  | 45.18435300 | C  | 21.60036400 | 2.24207700  | 42.50946600 |
| S | 22.57994700 | 7.84613400  | 46.58810600 | C  | 22.21164700 | 1.22383200  | 41.78664500 |
| H | 23.61653600 | 9.65680200  | 45.43221300 | O  | 20.05769700 | 2.96268400  | 44.19347600 |
| H | 24.45291600 | 8.13833300  | 45.02594000 | Cl | 18.98349300 | 0.20629800  | 44.80425600 |
| C | 22.90600500 | 5.94901500  | 42.76710200 | C  | 24.25888500 | -3.13941600 | 41.47917400 |
| H | 23.13502400 | 6.03503000  | 41.71029500 | O  | 24.88282000 | -3.28864800 | 40.43756000 |
| C | 25.36125100 | 4.76799800  | 46.75429800 | C  | 23.90443300 | -4.31704800 | 42.32635100 |
| H | 26.39028000 | 4.49588900  | 46.96745900 | O  | 21.73089400 | -2.41302900 | 41.16074200 |
| C | 21.30048300 | 5.10401800  | 49.36432500 | C  | 23.07052300 | -4.25024800 | 43.45643800 |
| H | 21.03636800 | 4.92296800  | 50.40189300 | C  | 22.78641800 | -5.38708800 | 44.20548300 |
| C | 18.91045200 | 6.59074400  | 45.43295800 | C  | 23.33985200 | -6.61772400 | 43.83592500 |
| H | 17.87826400 | 6.86475300  | 45.23643900 | C  | 24.17058700 | -6.70402100 | 42.71061300 |
| C | 23.92511600 | 5.54053500  | 43.61401700 | C  | 24.44218800 | -5.56334700 | 41.96658100 |
| C | 25.28122700 | 5.22797200  | 43.18373100 | O  | 23.03863200 | -7.70577400 | 44.60659400 |
| C | 25.96560700 | 4.94965200  | 44.33335700 | H  | 23.75657600 | -1.68854500 | 43.03517800 |
| C | 25.04338100 | 5.05837100  | 45.43313600 | H  | 24.90445200 | -0.38779100 | 40.62775500 |
| C | 25.76927700 | 5.18776400  | 41.76429700 | H  | 26.06281800 | -1.97015800 | 43.74420400 |
| H | 26.85700500 | 5.32820400  | 41.75976900 | H  | 28.09682600 | 0.11871500  | 43.53363900 |
| H | 25.35503800 | 6.01481900  | 41.17796500 | H  | 25.39412900 | 1.71104800  | 43.75739400 |
| C | 25.42773200 | 3.87929200  | 41.01758200 | H  | 23.66033300 | 2.76220000  | 45.15504200 |
| H | 26.02625600 | 3.03926200  | 41.38515200 | H  | 23.07610100 | -0.92731300 | 47.25848100 |
| H | 24.37925200 | 3.60982500  | 41.21249300 | H  | 24.78292000 | -2.01453900 | 45.81228600 |
| C | 25.57536600 | 4.00002500  | 39.47943700 | H  | 22.06416700 | 2.43454100  | 46.71205800 |
| O | 25.77604300 | 2.90462800  | 38.84295800 | H  | 22.85132500 | -0.92378000 | 40.26488300 |
| O | 25.45551700 | 5.12981800  | 38.96509900 | H  | 20.54466900 | -1.42615800 | 43.09277300 |
| C | 24.46328400 | 4.74352100  | 47.81351200 | H  | 21.87798400 | 3.27845100  | 42.34311500 |
| C | 24.81180700 | 4.39226000  | 49.16624400 | H  | 22.97634600 | 1.47233000  | 41.05515000 |
| C | 23.66463800 | 4.46618300  | 49.89772400 | H  | 20.88113300 | 3.53582400  | 44.97304200 |
| C | 22.62081700 | 4.87147200  | 48.99193600 | H  | 21.04981600 | -2.18847600 | 40.49631500 |
| C | 20.29717600 | 5.55889500  | 48.52241000 | H  | 22.61646100 | -3.31116200 | 43.75113100 |
| C | 18.92923400 | 5.78995000  | 48.92067600 | H  | 22.13735000 | -5.34031700 | 45.07399600 |
| C | 18.25839800 | 6.21134300  | 47.81403000 | H  | 24.59965300 | -7.66351800 | 42.42387000 |
| C | 19.22379800 | 6.24259100  | 46.74232500 | H  | 25.07892600 | -5.60993800 | 41.08918400 |
| C | 19.80277000 | 6.56435600  | 44.37180700 | H  | 23.48405400 | -8.48206700 | 44.23248700 |
| C | 19.45211000 | 6.90361500  | 43.01744300 | H  | 22.89228200 | 8.53792100  | 44.26011600 |

|                         |             |             |             |   |             |            |             |
|-------------------------|-------------|-------------|-------------|---|-------------|------------|-------------|
| H                       | 14.17316800 | 10.60585300 | 43.88153800 | H | 12.29497300 | 2.12843400 | 35.34977700 |
| H                       | 16.49407300 | 9.63869400  | 43.79738600 | H | 11.45991400 | 2.62217800 | 36.85767100 |
| H                       | 32.40903600 | 0.29795300  | 44.77896600 | H | 12.75221300 | 3.62178600 | 36.20744500 |
| H                       | 32.12206500 | -0.05504600 | 42.44999400 | H | 14.98500700 | 3.84236500 | 35.88889000 |
| H                       | 27.69077200 | -2.09504400 | 45.48000800 | H | 13.42123100 | 2.27062000 | 38.18388600 |
| H                       | 20.71077000 | 6.87474100  | 41.20428200 | H | 15.48104800 | 1.13460400 | 37.25063100 |
| H                       | 18.45979200 | 7.19494400  | 42.70104500 | H | 14.85303200 | 1.36473200 | 35.62566700 |
| H                       | 17.20916200 | 6.43671900  | 47.67795700 | N | 16.77862700 | 3.72228000 | 38.61264500 |
| H                       | 18.54501500 | 5.62263200  | 49.91902300 | C | 16.81833500 | 3.95516400 | 40.05527300 |
| H                       | 23.52066600 | 4.26710500  | 50.95212900 | C | 16.64214700 | 5.42445500 | 40.48243000 |
| H                       | 25.80616500 | 4.11458800  | 49.49164300 | O | 16.42757000 | 5.69594800 | 41.66488700 |
| H                       | 27.00421000 | 4.65713500  | 44.42974200 | C | 18.10641900 | 3.37796300 | 40.65355600 |
| H                       | 27.79223100 | -0.94156100 | 37.79677500 | H | 17.56995700 | 3.25434500 | 38.16876100 |
| H                       | 25.17429500 | 5.54657900  | 36.79190600 | H | 15.95612100 | 3.45193000 | 40.51015000 |
| H                       | 16.47617300 | 2.81500100  | 36.49332000 | H | 18.99312100 | 3.82690400 | 40.19306400 |
| H                       | 12.08718200 | 6.68095500  | 38.97763100 | H | 18.13884800 | 3.57474000 | 41.72726400 |
| <b><sup>2</sup>IM1A</b> |             |             |             | H | 18.14523700 | 2.29521800 | 40.49287200 |
| C                       | 24.90206500 | 5.86265600  | 35.75684100 | N | 16.74007500 | 6.36845400 | 39.50892600 |
| S                       | 24.13895300 | 4.43800100  | 34.89271600 | C | 16.35221000 | 7.74889200 | 39.74380800 |
| C                       | 25.28932600 | 3.12163700  | 35.44162200 | C | 14.84381400 | 8.04531100 | 39.89655100 |
| H                       | 24.21943500 | 6.71183700  | 35.65588500 | O | 14.50419600 | 9.19076500 | 40.18768500 |
| H                       | 25.38254900 | 3.11454400  | 36.53404100 | H | 16.78224000 | 6.02832700 | 38.55857400 |
| H                       | 24.88145100 | 2.16754300  | 35.09534000 | H | 16.81647800 | 8.09739500 | 40.66870500 |
| H                       | 26.27366200 | 3.26817400  | 34.98502900 | H | 16.73826700 | 8.36753500 | 38.92833000 |
| H                       | 25.85601900 | 6.12209900  | 35.28564900 | N | 13.99742400 | 7.00876500 | 39.69475300 |
| H                       | 21.10317900 | 2.07683200  | 34.66991400 | C | 12.57574400 | 7.09434800 | 40.00039500 |
| C                       | 20.74325400 | 1.70889800  | 35.63869400 | C | 12.23302900 | 6.31272900 | 41.28380400 |
| C                       | 20.05731200 | 2.83304100  | 36.40333100 | O | 12.00727700 | 6.90192000 | 42.34899800 |
| O                       | 19.05651800 | 2.61008900  | 37.10201300 | H | 14.35174300 | 6.09955600 | 39.40312900 |
| C                       | 21.93181000 | 1.10836100  | 36.41982200 | H | 12.33084700 | 8.14392200 | 40.16150500 |
| C                       | 21.56700000 | 0.53261300  | 37.79137700 | N | 12.26056500 | 4.96824900 | 41.14141500 |
| C                       | 20.74177100 | -0.74129000 | 37.69420600 | C | 11.72016600 | 4.06900000 | 42.16232500 |
| H                       | 22.50362400 | 0.29219500  | 38.31354700 | C | 12.40549000 | 4.15905500 | 43.53175400 |
| H                       | 19.99297200 | 0.93638400  | 35.45015100 | O | 11.79208400 | 3.84639800 | 44.54747700 |
| H                       | 21.04504600 | 1.27450100  | 38.40707600 | C | 11.80375800 | 2.61102900 | 41.65099000 |
| H                       | 22.70601000 | 1.87048000  | 36.56041900 | C | 11.20413300 | 2.33582700 | 40.23218000 |
| H                       | 22.36838600 | 0.30869300  | 35.81267900 | O | 11.31274000 | 3.26512500 | 39.37108200 |
| H                       | 19.66589100 | -0.28575400 | 39.39532800 | O | 10.72983100 | 1.19459400 | 40.05894400 |
| O                       | 20.75671000 | -1.48968500 | 36.73234900 | H | 12.11855300 | 4.53427800 | 40.20135600 |
| N                       | 20.00635400 | -1.06718800 | 38.84351700 | H | 10.67106700 | 4.32273700 | 42.36064100 |
| H                       | 19.29288000 | -1.76784200 | 38.66206300 | H | 11.31756700 | 1.95848100 | 42.37947800 |
| N                       | 20.63856400 | 4.05119400  | 36.28576200 | H | 12.86238900 | 2.31488800 | 41.60983200 |
| C                       | 20.22602600 | 5.23635700  | 37.03019500 | N | 13.72500600 | 4.52595800 | 43.53672700 |
| H                       | 19.80535800 | 5.97408600  | 36.33172900 | C | 14.47858800 | 4.65805800 | 44.77344600 |
| C                       | 21.38879100 | 5.86263000  | 37.81225200 | C | 14.78128100 | 6.12629100 | 45.13811900 |
| H                       | 21.02281100 | 6.79158800  | 38.27089100 | O | 15.75526500 | 6.41538800 | 45.84555600 |
| C                       | 21.98974300 | 4.94210800  | 38.87667300 | C | 15.75346800 | 3.80332000 | 44.78258700 |
| H                       | 19.42134500 | 4.92731200  | 37.70184000 | C | 16.20423500 | 3.45186900 | 46.20382100 |
| H                       | 22.29027300 | 3.98360200  | 38.44116300 | H | 13.82353600 | 4.27586400 | 45.56461500 |
| H                       | 22.17488600 | 6.15973400  | 37.10591900 | H | 14.15609000 | 4.82551600 | 42.66979200 |
| H                       | 21.52038300 | 4.11110300  | 35.78013000 | H | 16.55929600 | 4.28340900 | 44.21809900 |
| H                       | 22.89627300 | 5.38103600  | 39.30246200 | H | 15.52163300 | 2.85652400 | 44.27747800 |
| H                       | 21.27262500 | 4.73828000  | 39.68154300 | O | 15.42724200 | 3.41393200 | 47.15280200 |
| C                       | 15.54588400 | 3.18035200  | 36.55563800 | N | 17.52094500 | 3.12778400 | 46.32365500 |
| C                       | 15.60744600 | 3.85025500  | 37.91636800 | H | 17.83753000 | 2.80558200 | 47.22731100 |
| O                       | 14.64151800 | 4.45442000  | 38.39281800 | H | 18.16272800 | 3.04331800 | 45.54262300 |
| C                       | 14.85019500 | 1.79515700  | 36.63847900 | N | 13.88652500 | 7.03609600 | 44.69150200 |
| C                       | 13.41495900 | 1.78789000  | 37.20179300 | C | 13.95707000 | 8.45089700 | 45.02650300 |
| C                       | 12.42412900 | 2.58512800  | 36.34306400 | H | 12.97469300 | 8.76015300 | 45.40878500 |
| C                       | 12.91608600 | 0.34870400  | 37.40395200 | C | 14.34798600 | 9.34166800 | 43.83801000 |
| H                       | 13.63006000 | -0.24187900 | 37.99434100 | C | 15.78499000 | 9.12601100 | 43.35604900 |
| H                       | 11.96511200 | 0.35715500  | 37.94724700 | H | 14.68252700 | 8.54717900 | 45.83933300 |
| H                       | 12.77661300 | -0.16590200 | 36.44122500 | H | 13.65355000 | 9.15781500 | 43.00973200 |

|   |             |             |             |    |             |             |             |
|---|-------------|-------------|-------------|----|-------------|-------------|-------------|
| H | 15.93709000 | 8.08492800  | 43.05053700 | C  | 22.98509300 | 5.65061300  | 49.06956400 |
| H | 15.99484700 | 9.76213900  | 42.48959100 | C  | 20.58830200 | 6.09217500  | 48.62249900 |
| H | 13.16618900 | 6.75051900  | 44.03034900 | C  | 19.21974200 | 6.23015600  | 49.06088500 |
| N | 31.72164500 | 0.52254600  | 44.34630400 | C  | 18.45559700 | 6.37418600  | 47.94198500 |
| C | 31.89116800 | 0.64877600  | 42.90703900 | C  | 19.36390800 | 6.34163500  | 46.82277800 |
| C | 30.60734700 | 1.17515900  | 42.26455500 | C  | 19.80814300 | 6.40825800  | 44.40585500 |
| O | 29.53030800 | 1.11301900  | 42.85451100 | C  | 19.38948300 | 6.56435300  | 43.03458400 |
| H | 30.81710800 | 0.08808100  | 44.54580400 | C  | 20.50981400 | 6.44390200  | 42.27009500 |
| H | 32.72770600 | 1.32754800  | 42.68757400 | C  | 21.61038000 | 6.19346700  | 43.17209900 |
| N | 30.70981700 | 1.68382100  | 41.00418000 | N  | 23.94807300 | 5.68776200  | 44.98529700 |
| C | 29.51797500 | 1.95139200  | 40.19918200 | N  | 23.42542400 | 5.61566000  | 47.77405100 |
| C | 28.98575300 | 0.63411400  | 39.58100400 | N  | 20.65644900 | 6.17445000  | 47.25389400 |
| O | 29.69294500 | -0.37388200 | 39.52364300 | N  | 21.16804500 | 6.18972900  | 44.46896500 |
| C | 30.07329800 | 2.88384200  | 39.10542200 | Fe | 22.29845300 | 5.85765200  | 46.12774900 |
| C | 31.46133400 | 2.27662700  | 38.82788400 | O  | 21.96774100 | 4.07613700  | 46.05642300 |
| C | 31.94070700 | 1.78031200  | 40.21032300 | C  | 23.82067200 | -1.68373000 | 41.95887200 |
| H | 31.36201900 | 1.42418000  | 38.14971700 | N  | 24.87031200 | -0.74294700 | 41.63119400 |
| H | 28.74523200 | 2.41226800  | 40.81727900 | C  | 25.93981600 | -0.33994400 | 42.37411100 |
| H | 32.63682900 | 2.49273500  | 40.67434600 | O  | 26.70991600 | 0.51630600  | 41.94734500 |
| H | 32.44451400 | 0.81010500  | 40.13467500 | C  | 26.14902200 | -0.92112800 | 43.79022600 |
| H | 32.16163200 | 2.98971500  | 38.38055700 | N  | 27.56741300 | -0.75391600 | 44.10135900 |
| H | 30.16450700 | 3.90141500  | 39.50385500 | C  | 28.21469200 | -1.49403000 | 45.02276200 |
| H | 29.42884900 | 2.91957100  | 38.22323600 | O  | 29.40035700 | -1.39953500 | 45.33100700 |
| N | 27.74597000 | 0.71218200  | 39.04853000 | C  | 25.19980400 | -0.22217100 | 44.75943600 |
| C | 27.08621200 | -0.49183400 | 38.55961400 | C  | 25.15245100 | 1.17823500  | 44.81061300 |
| C | 25.71290800 | -0.18996900 | 37.94800600 | C  | 24.23737700 | 1.83564500  | 45.62033600 |
| O | 24.81189100 | 0.36282100  | 38.92020000 | C  | 23.33039500 | 1.10473700  | 46.41255800 |
| C | 25.08443900 | -1.46198900 | 37.38471100 | C  | 23.40340400 | -0.29786800 | 46.40448200 |
| H | 26.96595300 | -1.21806400 | 39.37471400 | C  | 24.32504500 | -0.94552600 | 45.58185200 |
| H | 24.11268400 | -1.24440900 | 36.92926400 | O  | 22.39931500 | 1.70500300  | 47.17925800 |
| H | 25.72987900 | -1.90580700 | 36.61747600 | C  | 22.49664300 | -1.17304200 | 41.28540800 |
| H | 27.15820900 | 1.52744200  | 39.23813100 | C  | 21.79610200 | -0.11053000 | 42.11972800 |
| H | 25.84230200 | 0.54878300  | 37.14392100 | C  | 20.55685800 | -0.40479800 | 42.72275000 |
| H | 24.93611100 | -2.19633600 | 38.18273700 | C  | 19.89995300 | 0.54153400  | 43.48467500 |
| H | 25.05078000 | 1.32933300  | 39.02817400 | C  | 20.46418900 | 1.86786800  | 43.71932800 |
| C | 23.51311500 | 8.82331600  | 44.82076400 | C  | 21.74287300 | 2.11804200  | 43.08265400 |
| S | 22.41663400 | 8.27685300  | 46.16601700 | C  | 22.36761800 | 1.17410100  | 42.30455800 |
| H | 23.54736600 | 9.91698700  | 44.81838700 | O  | 19.88813700 | 2.74388800  | 44.41595000 |
| H | 24.51919900 | 8.41270200  | 44.94145700 | Cl | 18.36445500 | 0.16379800  | 44.20953400 |
| C | 22.92146000 | 5.94232900  | 42.77182400 | C  | 24.15081100 | -3.10912000 | 41.43718700 |
| H | 23.11409500 | 5.93972600  | 41.70398600 | O  | 24.81595900 | -3.23744500 | 40.42020700 |
| C | 25.61943200 | 5.29181300  | 46.73504500 | C  | 23.71518600 | -4.30058400 | 42.22123500 |
| H | 26.66697800 | 5.07869700  | 46.92622900 | O  | 21.66158800 | -2.28865700 | 41.02948100 |
| C | 21.66985600 | 5.87317100  | 49.46697000 | C  | 22.83182700 | -4.24235700 | 43.31373700 |
| H | 21.46616200 | 5.85346300  | 50.53390500 | C  | 22.47051900 | -5.39297700 | 44.00540300 |
| C | 18.95591300 | 6.45708900  | 45.49728000 | C  | 22.99518400 | -6.63034600 | 43.61507700 |
| H | 17.89127500 | 6.58555600  | 45.32394600 | C  | 23.87479700 | -6.70793600 | 42.52657700 |
| C | 23.99712000 | 5.67026600  | 43.61142800 | C  | 24.22313000 | -5.55296700 | 41.83923200 |
| C | 25.34199600 | 5.36067500  | 43.14228900 | O  | 22.61710000 | -7.73101400 | 44.32905500 |
| C | 26.09218800 | 5.20872900  | 44.27460800 | H  | 23.68790500 | -1.70343200 | 43.04139800 |
| C | 25.22561000 | 5.40489500  | 45.40806300 | H  | 24.88937400 | -0.37854100 | 40.66878600 |
| C | 25.77102400 | 5.23278600  | 41.70827100 | H  | 25.91733100 | -1.99380400 | 43.78858200 |
| H | 26.86118800 | 5.34341300  | 41.65587200 | H  | 28.08808400 | -0.04057900 | 43.58136800 |
| H | 25.35625100 | 6.04542500  | 41.10180900 | H  | 25.83103200 | 1.75928800  | 44.19175400 |
| C | 25.37182200 | 3.90739200  | 41.02203900 | H  | 24.18807400 | 2.91706100  | 45.62899300 |
| H | 25.94075600 | 3.05997700  | 41.41880100 | H  | 22.71488100 | -0.86001200 | 47.02869700 |
| H | 24.31293900 | 3.69275000  | 41.23137600 | H  | 24.35591900 | -2.03481900 | 45.57298400 |
| C | 25.50858000 | 3.96771000  | 39.47923200 | H  | 22.29471600 | 2.65794700  | 46.88873000 |
| O | 25.72540700 | 2.85481300  | 38.87741500 | H  | 22.81550200 | -0.72335800 | 40.33611100 |
| O | 25.36532600 | 5.07576000  | 38.92649700 | H  | 20.12461700 | -1.38807900 | 42.57745600 |
| C | 24.77384700 | 5.39086800  | 47.83623600 | H  | 22.18539200 | 3.09286600  | 43.25503600 |
| C | 25.19935800 | 5.26748700  | 49.21017500 | H  | 23.32008800 | 1.40586000  | 41.83999000 |
| C | 24.08601700 | 5.43001000  | 49.97769600 | H  | 21.16930100 | 3.90617700  | 45.51732100 |





|   |             |             |             |    |             |             |             |
|---|-------------|-------------|-------------|----|-------------|-------------|-------------|
| N | 13.86974000 | 6.96720600  | 44.76362400 | H  | 24.33076000 | 3.70553500  | 41.25970100 |
| C | 13.87187400 | 8.37911700  | 45.11850200 | C  | 25.49737100 | 3.95169700  | 39.48333400 |
| H | 12.86816100 | 8.63819800  | 45.48123400 | O  | 25.73655500 | 2.83053400  | 38.90832500 |
| C | 14.25036300 | 9.30636500  | 43.95388700 | O  | 25.31204400 | 5.04219700  | 38.90700200 |
| C | 15.69746400 | 9.14310800  | 43.48186100 | C  | 24.74144800 | 5.41419000  | 47.80015100 |
| H | 14.57350000 | 8.49521900  | 45.94960700 | C  | 25.15378000 | 5.26997000  | 49.17427200 |
| H | 13.57074500 | 9.12342500  | 43.11339200 | C  | 24.03664700 | 5.44320900  | 49.93533200 |
| H | 15.87845600 | 8.11774000  | 43.14105900 | C  | 22.94823900 | 5.68974100  | 49.02149600 |
| H | 15.89998000 | 9.81428900  | 42.64051700 | C  | 20.56102800 | 6.16293000  | 48.56000600 |
| H | 13.15289500 | 6.65277100  | 44.11221700 | C  | 19.19098600 | 6.30988700  | 48.98880900 |
| N | 31.58032300 | 0.51320300  | 44.48855100 | C  | 18.43527400 | 6.46366600  | 47.86593500 |
| C | 31.78282200 | 0.61162600  | 43.05121500 | C  | 19.35109600 | 6.43264200  | 46.75341200 |
| C | 30.51957200 | 1.14075400  | 42.37115000 | C  | 19.81909000 | 6.53356200  | 44.34280600 |
| O | 29.42672900 | 1.08771200  | 42.93355200 | C  | 19.41477200 | 6.70652500  | 42.96933900 |
| H | 30.66935400 | 0.08692400  | 44.67572200 | C  | 20.54241100 | 6.59134000  | 42.21507700 |
| H | 32.63225600 | 1.27612500  | 42.83899000 | C  | 21.63311300 | 6.32639000  | 43.12457000 |
| N | 30.65793400 | 1.63986200  | 41.11098500 | N  | 23.94721200 | 5.76233400  | 44.94782700 |
| C | 29.49015400 | 1.91488200  | 40.27371900 | N  | 23.39580900 | 5.65956200  | 47.72959500 |
| C | 28.97350200 | 0.60355000  | 39.62981100 | N  | 20.63992000 | 6.25163200  | 47.19010700 |
| O | 29.68344500 | -0.40325300 | 39.57847700 | N  | 21.17733000 | 6.31172400  | 44.41887400 |
| C | 30.07910500 | 2.85261500  | 39.20240100 | Fe | 22.28190600 | 5.95651900  | 46.07447000 |
| C | 31.47241600 | 2.24219200  | 38.95959900 | O  | 21.91920500 | 4.11769500  | 45.93249100 |
| C | 31.91053100 | 1.73170100  | 40.35090200 | C  | 23.81435800 | -1.83359400 | 41.88023400 |
| H | 31.38955700 | 1.39624400  | 38.27119700 | N  | 24.86079500 | -0.88673800 | 41.56006700 |
| H | 28.70113300 | 2.37363100  | 40.87259500 | C  | 25.88238500 | -0.42776900 | 42.33167500 |
| H | 32.59971200 | 2.43480300  | 40.83874300 | O  | 26.65489500 | 0.43145500  | 41.91494300 |
| H | 32.40747100 | 0.75750800  | 40.28162000 | C  | 26.03616700 | -0.94822500 | 43.78008500 |
| H | 32.18788900 | 2.95668100  | 38.53922200 | N  | 27.44530100 | -0.78335500 | 44.13172900 |
| H | 30.16252300 | 3.86737200  | 39.60994800 | C  | 28.05078600 | -1.48505800 | 45.11124500 |
| H | 29.45958800 | 2.89603800  | 38.30277000 | O  | 29.22267300 | -1.37938600 | 45.46320900 |
| N | 27.74801100 | 0.68913500  | 39.06774600 | C  | 25.07748300 | -0.17493300 | 44.67748900 |
| C | 27.10012200 | -0.50587200 | 38.54203100 | C  | 25.10169800 | 1.23126700  | 44.67052000 |
| C | 25.73753500 | -0.18841900 | 37.91392600 | C  | 24.20438500 | 1.96184500  | 45.42202400 |
| O | 24.81377100 | 0.32608000  | 38.88417500 | C  | 23.23458900 | 1.31897700  | 46.25875500 |
| C | 25.12050700 | -1.43765600 | 37.29146100 | C  | 23.24348900 | -0.11055600 | 46.28133600 |
| H | 26.96829700 | -1.25037600 | 39.33881700 | C  | 24.14026800 | -0.82630800 | 45.50388000 |
| H | 24.16621600 | -1.18958800 | 36.81449900 | O  | 22.38941000 | 1.99065700  | 46.97414400 |
| H | 25.78500300 | -1.86297700 | 36.52984200 | C  | 22.47607600 | -1.30101200 | 41.26219400 |
| H | 27.15373800 | 1.49950100  | 39.26106800 | C  | 21.82837900 | -0.22481700 | 42.12024200 |
| H | 25.88334000 | 0.57753900  | 37.13893400 | C  | 20.69138000 | -0.53873700 | 42.89239300 |
| H | 24.93798000 | -2.19486900 | 38.06067100 | C  | 20.09245300 | 0.41427900  | 43.69541000 |
| H | 25.04160500 | 1.28817000  | 39.02372400 | C  | 20.59830600 | 1.77318300  | 43.79723300 |
| C | 23.63988400 | 8.89090300  | 44.89369700 | C  | 21.77202000 | 2.04225900  | 42.99729700 |
| S | 22.47703700 | 8.35295500  | 46.18893200 | C  | 22.34570600 | 1.08823600  | 42.18034400 |
| H | 23.71338700 | 9.98231600  | 44.93256200 | O  | 20.05010300 | 2.66204100  | 44.51619100 |
| H | 24.62825000 | 8.44570600  | 45.03748000 | Cl | 18.67112600 | -0.00609000 | 44.62119000 |
| C | 22.94137500 | 6.05853600  | 42.73096400 | C  | 24.14308900 | -3.23623900 | 41.30363500 |
| H | 23.14109600 | 6.06245700  | 41.66438200 | O  | 24.74514700 | -3.32739900 | 40.24375400 |
| C | 25.59707700 | 5.31941800  | 46.70607800 | C  | 23.79441500 | -4.45467500 | 42.09096300 |
| H | 26.63968200 | 5.09002700  | 46.90501100 | O  | 21.62310300 | -2.41608100 | 41.05681300 |
| C | 21.63163100 | 5.92718800  | 49.41130000 | C  | 22.90745100 | -4.45601000 | 43.18218600 |
| H | 21.41913700 | 5.90191200  | 50.47619600 | C  | 22.63215200 | -5.62692300 | 43.87975100 |
| C | 18.95519700 | 6.56768500  | 45.42614200 | C  | 23.25152000 | -6.82300400 | 43.49929300 |
| H | 17.89246200 | 6.70036400  | 45.24622600 | C  | 24.13480400 | -6.84108000 | 42.41127600 |
| C | 24.00657200 | 5.75601500  | 43.57597900 | C  | 24.39380100 | -5.66767200 | 41.71493500 |
| C | 25.34720100 | 5.42303300  | 43.11264200 | O  | 22.95921400 | -7.94446400 | 44.22210300 |
| C | 26.08854500 | 5.25366100  | 44.24939000 | H  | 23.69966000 | -1.88989200 | 42.96284200 |
| C | 25.21760800 | 5.45520000  | 45.37701300 | H  | 24.87797000 | -0.51260300 | 40.60081700 |
| C | 25.77523300 | 5.27334000  | 41.68079200 | H  | 25.78762400 | -2.01528500 | 43.82920600 |
| H | 26.86427400 | 5.39294700  | 41.62226000 | H  | 27.98582900 | -0.08183100 | 43.61478400 |
| H | 25.34966900 | 6.06720900  | 41.05732300 | H  | 25.82518200 | 1.74621100  | 44.04453800 |
| C | 25.38388500 | 3.92752200  | 41.02933500 | H  | 24.21941200 | 3.04322000  | 45.39198700 |
| H | 25.96687400 | 3.09553900  | 41.43820500 | H  | 22.51975400 | -0.61216900 | 46.91650500 |

|                         |             |             |             |   |             |             |             |
|-------------------------|-------------|-------------|-------------|---|-------------|-------------|-------------|
| H                       | 24.12143000 | -1.91577600 | 45.53088400 | H | 22.26885500 | 6.11692800  | 36.83115600 |
| H                       | 22.21072100 | 3.17890600  | 46.51390100 | H | 21.54988500 | 4.00176700  | 35.64063900 |
| H                       | 22.76139800 | -0.86985100 | 40.29340400 | H | 22.92824700 | 5.47386400  | 39.09424500 |
| H                       | 20.28290800 | -1.54244400 | 42.84483700 | H | 21.27926700 | 4.91108700  | 39.48407900 |
| H                       | 22.17386600 | 3.04927000  | 43.04827500 | C | 15.58351200 | 3.47610500  | 36.37773700 |
| H                       | 23.21722100 | 1.34868300  | 41.58659200 | C | 15.60033600 | 4.05130500  | 37.78280300 |
| H                       | 21.14484100 | 3.86491200  | 45.37793500 | O | 14.60998600 | 4.59993900  | 38.27657100 |
| H                       | 20.95241600 | -2.12490900 | 40.40388900 | C | 14.99370100 | 2.04109300  | 36.36129600 |
| H                       | 22.39834700 | -3.54488700 | 43.47645700 | C | 13.57385400 | 1.88938900  | 36.94293500 |
| H                       | 21.94035000 | -5.63468500 | 44.71593400 | C | 12.51419300 | 2.67129400  | 36.15489800 |
| H                       | 24.61453400 | -7.77339500 | 42.11577600 | C | 13.18298500 | 0.40748200  | 37.04998600 |
| H                       | 25.06932600 | -5.66334800 | 40.86560500 | H | 13.94807400 | -0.16992300 | 37.58634700 |
| H                       | 23.45249800 | -8.69180800 | 43.84891800 | H | 12.24388800 | 0.30793400  | 37.60445600 |
| H                       | 23.26908000 | 8.59848200  | 43.90455200 | H | 13.06138600 | -0.04703500 | 36.05552000 |
| H                       | 14.07878600 | 10.34318400 | 44.28032700 | H | 12.41654900 | 2.28935900  | 35.12716200 |
| H                       | 16.40967700 | 9.36115200  | 44.28791100 | H | 11.55166600 | 2.58708900  | 36.66711400 |
| H                       | 32.27470200 | -0.11820300 | 44.88231900 | H | 12.75591500 | 3.73869100  | 36.10722700 |
| H                       | 32.01192100 | -0.34592000 | 42.53922300 | H | 14.97596700 | 4.14266000  | 35.75848500 |
| H                       | 27.37079900 | -2.21667700 | 45.59546100 | H | 13.56498300 | 2.30250500  | 37.95674400 |
| H                       | 20.64507400 | 6.65851600  | 41.13972900 | H | 15.68381100 | 1.38579800  | 36.91119200 |
| H                       | 18.39238000 | 6.85906700  | 42.64872000 | H | 15.00746700 | 1.69000000  | 35.31844300 |
| H                       | 17.36336400 | 6.55896900  | 47.75170900 | N | 16.76139800 | 3.90078400  | 38.49061400 |
| H                       | 18.86364200 | 6.26820100  | 50.02024100 | C | 16.76896700 | 4.02279100  | 39.94818900 |
| H                       | 23.94037500 | 5.40484200  | 51.01315200 | C | 16.52566900 | 5.44798600  | 40.47680700 |
| H                       | 26.16590000 | 5.05847400  | 49.49525000 | O | 16.24070900 | 5.62365700  | 41.66259900 |
| H                       | 27.13641300 | 4.98706300  | 44.32016400 | C | 18.07610500 | 3.46333500  | 40.52228400 |
| H                       | 27.75610900 | -0.95878100 | 37.78835800 | H | 17.55235900 | 3.43887600  | 38.03801400 |
| H                       | 25.08058600 | 5.51884600  | 36.76277600 | H | 15.92517000 | 3.44961400  | 40.35211200 |
| H                       | 16.57291200 | 3.29469100  | 36.05145200 | H | 18.94445500 | 4.00351300  | 40.13047500 |
| H                       | 11.89771600 | 6.67860900  | 39.26573000 | H | 18.07482100 | 3.56029900  | 41.61007600 |
| <b>2IM2<sub>B</sub></b> |             |             |             | H | 18.18108400 | 2.40490900  | 40.26022300 |
| C                       | 24.95462700 | 5.64986000  | 35.46687100 | N | 16.65426500 | 6.46554300  | 39.58536300 |
| S                       | 24.13199400 | 4.20584400  | 34.69440400 | C | 16.23352300 | 7.81929600  | 39.90434300 |
| C                       | 25.22939000 | 2.88064600  | 35.32350000 | C | 14.71678500 | 8.06469600  | 40.05993400 |
| H                       | 24.30570000 | 6.51742300  | 35.31379000 | O | 14.34044900 | 9.16777800  | 40.45054100 |
| H                       | 25.33496300 | 2.94620500  | 36.41276500 | H | 16.76534600 | 6.20067600  | 38.61674700 |
| H                       | 24.77471800 | 1.92421800  | 35.04930500 | H | 16.67987900 | 8.12250700  | 40.85385400 |
| H                       | 26.21409800 | 2.94943900  | 34.84951700 | H | 16.61312100 | 8.49557400  | 39.13281300 |
| H                       | 25.91618100 | 5.84079500  | 34.97877800 | N | 13.90020800 | 7.03090700  | 39.74556900 |
| H                       | 21.03741700 | 1.91496600  | 34.65244200 | C | 12.48284800 | 7.03595300  | 40.07694500 |
| C                       | 20.63577200 | 1.62954000  | 35.63267600 | C | 12.19308200 | 6.16125500  | 41.31316100 |
| C                       | 20.01186400 | 2.83810500  | 36.31593900 | O | 11.91501200 | 6.66897100  | 42.40522900 |
| O                       | 18.98932600 | 2.71538700  | 37.00817400 | H | 14.28542100 | 6.15765700  | 39.39047300 |
| C                       | 21.76698700 | 0.99498200  | 36.47035300 | H | 12.19472300 | 8.06074200  | 40.30992800 |
| C                       | 21.35990100 | 0.56388300  | 37.88222500 | N | 12.32350500 | 4.82876900  | 41.10148200 |
| C                       | 20.40682000 | -0.62297200 | 37.89691000 | C | 11.83855000 | 3.84503900  | 42.07117700 |
| H                       | 22.27189800 | 0.28697000  | 38.42768500 | C | 12.49503500 | 3.92147200  | 43.45766000 |
| H                       | 19.83963300 | 0.89798600  | 35.47620600 | O | 11.87456400 | 3.53187700  | 44.44239800 |
| H                       | 20.91081600 | 1.39788000  | 38.43545700 | C | 12.03609600 | 2.42063000  | 41.50525300 |
| H                       | 22.60276700 | 1.69820900  | 36.55707200 | C | 11.42781400 | 2.15891200  | 40.09355700 |
| H                       | 22.13518200 | 0.11731200  | 35.92867400 | O | 11.44326200 | 3.10952800  | 39.25939500 |
| H                       | 19.69532000 | -0.11551500 | 39.77377400 | O | 11.02547600 | 0.98828800  | 39.89128800 |
| O                       | 20.19928000 | -1.34526600 | 36.93720300 | H | 12.22593900 | 4.45047300  | 40.14151900 |
| N                       | 19.82128200 | -0.89836900 | 39.13935600 | H | 10.77125700 | 4.01085300  | 42.26417100 |
| H                       | 19.00399900 | -1.49730000 | 39.06739700 | H | 11.62215500 | 1.70370500  | 42.21790400 |
| N                       | 20.66185700 | 4.01306900  | 36.13920900 | H | 13.11397300 | 2.21574500  | 41.43048200 |
| C                       | 20.28772300 | 5.26253600  | 36.79429600 | N | 13.78901600 | 4.36078400  | 43.50927900 |
| H                       | 19.90050500 | 5.96420900  | 36.04131500 | C | 14.50010300 | 4.48190300  | 44.77364400 |
| C                       | 21.46429900 | 5.89931100  | 37.54558900 | C | 14.74297300 | 5.94897000  | 45.18357600 |
| H                       | 21.12879600 | 6.87081100  | 37.93364300 | O | 15.70631000 | 6.25805800  | 45.89477700 |
| C                       | 22.01618900 | 5.03500900  | 38.68089400 | C | 15.79934800 | 3.66561500  | 44.81157700 |
| H                       | 19.46629000 | 5.02911200  | 37.47627800 | C | 16.20284000 | 3.30607400  | 46.24573600 |
| H                       | 22.28974500 | 4.03917200  | 38.31702400 | H | 13.83206500 | 4.05941400  | 45.53262200 |

|   |             |             |             |    |             |             |             |
|---|-------------|-------------|-------------|----|-------------|-------------|-------------|
| H | 14.23486000 | 4.71101500  | 42.66783600 | C  | 26.08601600 | 5.31957800  | 44.01497100 |
| H | 16.61199400 | 4.17851600  | 44.28770400 | C  | 25.24328700 | 5.51938100  | 45.16915100 |
| H | 15.61466000 | 2.72049600  | 44.28450800 | C  | 25.70866900 | 5.34514700  | 41.46015300 |
| O | 15.38246700 | 3.21346400  | 47.15468900 | H  | 26.79525100 | 5.47174100  | 41.37461500 |
| N | 17.52487500 | 3.04347100  | 46.42608600 | H  | 25.26603000 | 6.13600700  | 40.84543100 |
| H | 17.80418800 | 2.71410600  | 47.33933100 | C  | 25.31530300 | 3.99116200  | 40.82984800 |
| H | 18.20938200 | 2.98504400  | 45.67788900 | H  | 25.86261000 | 3.16190700  | 41.29120200 |
| N | 13.80314000 | 6.83257300  | 44.77376400 | H  | 24.24927400 | 3.79818500  | 41.02452900 |
| C | 13.81193700 | 8.23512900  | 45.16348900 | C  | 25.49760700 | 3.95933300  | 39.29349500 |
| H | 12.80614600 | 8.49420300  | 45.52115500 | O  | 25.69237800 | 2.80307800  | 38.76280000 |
| C | 14.21382900 | 9.18790000  | 44.02777100 | O  | 25.41217400 | 5.03383200  | 38.67067200 |
| C | 15.66670800 | 9.02364600  | 43.57464000 | C  | 24.85369200 | 5.58486400  | 47.60847100 |
| H | 14.50432000 | 8.32396400  | 46.00563200 | C  | 25.31508100 | 5.52208100  | 48.97311100 |
| H | 13.54574600 | 9.03100900  | 43.17260100 | C  | 24.22460400 | 5.73078300  | 49.76540600 |
| H | 15.84491400 | 8.00268900  | 43.21977600 | C  | 23.09702900 | 5.91164800  | 48.88472700 |
| H | 15.88719200 | 9.70832600  | 42.74888000 | C  | 20.67237900 | 6.21725300  | 48.48680200 |
| H | 13.09647100 | 6.53855000  | 44.10291800 | C  | 19.30953300 | 6.32215900  | 48.96149600 |
| N | 31.72491100 | 0.33612000  | 44.33386200 | C  | 18.50882600 | 6.37328600  | 47.86200300 |
| C | 31.85445300 | 0.52583900  | 42.89692500 | C  | 19.38854200 | 6.31812900  | 46.71746000 |
| C | 30.54507300 | 1.05505700  | 42.31167700 | C  | 19.79083100 | 6.37908700  | 44.29201700 |
| O | 29.49057600 | 0.96532200  | 42.94035100 | C  | 19.33481800 | 6.52228000  | 42.92983100 |
| H | 30.81387400 | -0.08086300 | 44.53720800 | C  | 20.44560900 | 6.47175200  | 42.14394100 |
| H | 32.67292800 | 1.22796200  | 42.68274800 | C  | 21.57575200 | 6.27690800  | 43.02482100 |
| N | 30.59743000 | 1.59853100  | 41.06610600 | N  | 23.96037200 | 5.81161600  | 44.77284800 |
| C | 29.37556100 | 1.86143400  | 40.30548800 | N  | 23.50358200 | 5.82222100  | 47.57458400 |
| C | 28.84266700 | 0.54079700  | 39.69201000 | N  | 20.69755800 | 6.21328800  | 47.11762900 |
| O | 29.52568000 | -0.48539300 | 39.68974700 | N  | 21.15233900 | 6.23491900  | 44.32909200 |
| C | 29.87872700 | 2.82189400  | 39.21192500 | Fe | 22.33737400 | 6.09546800  | 45.94988900 |
| C | 31.26359500 | 2.23820200  | 38.87486700 | O  | 22.05082600 | 4.03608800  | 45.84011900 |
| C | 31.79813300 | 1.72152400  | 40.22960100 | C  | 23.77878300 | -1.64296600 | 41.99605000 |
| H | 31.15265100 | 1.39859900  | 38.18190100 | N  | 24.80883400 | -0.67032900 | 41.68659900 |
| H | 28.61524500 | 2.29651200  | 40.95664400 | C  | 25.84170400 | -0.24029600 | 42.45315100 |
| H | 32.50351700 | 2.43186900  | 40.68201100 | O  | 26.59224000 | 0.65931600  | 42.08882300 |
| H | 32.30751900 | 0.75758900  | 40.11853900 | C  | 26.06473400 | -0.87960500 | 43.85097900 |
| H | 31.93894500 | 2.96845600  | 38.41750700 | N  | 27.48853300 | -0.77130300 | 44.14467600 |
| H | 29.97184300 | 3.83249600  | 39.62685300 | C  | 28.12208300 | -1.59641200 | 45.00914100 |
| H | 29.20316600 | 2.86726000  | 38.35412600 | O  | 29.31340600 | -1.56964000 | 45.29422600 |
| N | 27.62516700 | 0.63251100  | 39.11541900 | C  | 25.19536700 | -0.16579700 | 44.87825700 |
| C | 26.96001200 | -0.55944600 | 38.60502500 | C  | 25.28247600 | 1.24206800  | 45.01239300 |
| C | 25.59306700 | -0.22680900 | 37.99528600 | C  | 24.46056100 | 1.91658800  | 45.88164200 |
| O | 24.71353300 | 0.36107000  | 38.96777600 | C  | 23.49257400 | 1.20498100  | 46.69677800 |
| C | 24.92875900 | -1.48085300 | 37.43466900 | C  | 23.46750200 | -0.24177400 | 46.58384700 |
| H | 26.83047900 | -1.29626900 | 39.40851600 | C  | 24.28910000 | -0.89075900 | 45.68888200 |
| H | 23.97021800 | -1.22970900 | 36.96903600 | O  | 22.68960800 | 1.80917700  | 47.46087700 |
| H | 25.56561000 | -1.94985300 | 36.67510900 | C  | 22.45138900 | -1.15520400 | 41.31588900 |
| H | 27.06217000 | 1.48120000  | 39.22199300 | C  | 21.74768900 | -0.09474900 | 42.14780300 |
| H | 25.74049300 | 0.50519200  | 37.18926700 | C  | 20.61898400 | -0.44086400 | 42.91175400 |
| H | 24.75001800 | -2.20645000 | 38.23397400 | C  | 20.00174900 | 0.49134200  | 43.72886200 |
| H | 24.95775100 | 1.33290300  | 39.02006400 | C  | 20.49199200 | 1.84978600  | 43.86115800 |
| C | 24.27365300 | 8.75400200  | 46.40740300 | C  | 21.63296000 | 2.16674600  | 43.03453000 |
| S | 22.55018000 | 8.33346900  | 45.95883000 | C  | 22.22709800 | 1.23452900  | 42.21080500 |
| H | 24.36672500 | 9.84372700  | 46.34249700 | O  | 19.96916500 | 2.70273300  | 44.64464700 |
| H | 24.51311500 | 8.43921600  | 47.42707500 | Cl | 18.60407600 | 0.02081300  | 44.66568100 |
| C | 22.88095400 | 6.07687900  | 42.59056700 | C  | 24.16264000 | -3.05809700 | 41.48984200 |
| H | 23.04858700 | 6.09606300  | 41.51877900 | O  | 24.85275000 | -3.17464900 | 40.48808800 |
| C | 25.66847900 | 5.42555600  | 46.48788800 | C  | 23.75641600 | -4.25521500 | 42.28178500 |
| H | 26.71943100 | 5.21164600  | 46.66053500 | O  | 21.63804200 | -2.29370700 | 41.08627800 |
| C | 21.78742300 | 6.10101100  | 49.31106100 | C  | 22.81357100 | -4.22505300 | 43.32513100 |
| H | 21.61529800 | 6.12927300  | 50.38341200 | C  | 22.49174000 | -5.37727000 | 44.03328600 |
| C | 18.95102900 | 6.39291700  | 45.40250500 | C  | 23.11669200 | -6.58758500 | 43.71044300 |
| H | 17.87991300 | 6.47833800  | 45.24595500 | C  | 24.05448800 | -6.63745800 | 42.67001100 |
| C | 23.98031400 | 5.81311500  | 43.40367600 | C  | 24.36217700 | -5.48183900 | 41.96420800 |
| C | 25.31392300 | 5.49255200  | 42.90220600 | O  | 22.77493500 | -7.68889900 | 44.44063700 |



|   |             |             |             |    |             |             |             |
|---|-------------|-------------|-------------|----|-------------|-------------|-------------|
| N | 14.85546700 | 4.05999000  | 44.31385100 | H  | 26.60465500 | 5.85489900  | 46.81679200 |
| C | 15.43558300 | 4.56623800  | 45.54698800 | C  | 21.88449000 | 8.06530000  | 49.05320700 |
| C | 15.14224000 | 6.06586100  | 45.75065900 | H  | 21.73532800 | 8.38858700  | 50.07967400 |
| O | 15.94806800 | 6.79974800  | 46.33292300 | C  | 19.03590200 | 7.54909400  | 45.17878500 |
| C | 16.93308500 | 4.26030400  | 45.69404600 | H  | 17.96846700 | 7.62943900  | 45.00258800 |
| C | 17.36403000 | 4.24625500  | 47.16422000 | C  | 24.01096700 | 6.24510100  | 43.40348200 |
| H | 14.92248200 | 4.03073500  | 46.35418800 | C  | 25.34696600 | 5.82588800  | 42.99189200 |
| H | 15.13182100 | 4.46797400  | 43.42666900 | C  | 26.06210500 | 5.70908300  | 44.15190000 |
| H | 17.54880400 | 4.95221400  | 45.11052500 | C  | 25.19741900 | 6.08027600  | 45.24416000 |
| H | 17.10962700 | 3.25118600  | 45.30045900 | C  | 25.80081700 | 5.57693100  | 41.57877000 |
| O | 16.58799500 | 3.96601800  | 48.07214800 | H  | 26.81876400 | 5.97027700  | 41.45624300 |
| N | 18.69319400 | 4.45861700  | 47.38837500 | H  | 25.18101900 | 6.12946200  | 40.86721800 |
| H | 18.97853800 | 4.52796900  | 48.35549900 | C  | 25.78480000 | 4.09688700  | 41.14440000 |
| H | 19.31896400 | 4.87293100  | 46.70938900 | H  | 26.63837900 | 3.54745200  | 41.55479500 |
| N | 13.93541600 | 6.48668400  | 45.29899300 | H  | 24.89681900 | 3.59614400  | 41.55280800 |
| C | 13.45039700 | 7.84392800  | 45.50529900 | C  | 25.72330300 | 3.88667700  | 39.61051400 |
| H | 12.41364100 | 7.78160800  | 45.86189500 | O  | 26.12152100 | 2.74508400  | 39.19013500 |
| C | 13.50790800 | 8.72574200  | 44.24925700 | O  | 25.25144000 | 4.80444700  | 38.90844800 |
| C | 14.92601700 | 8.98592900  | 43.73443600 | C  | 24.80230300 | 6.64762700  | 47.61262500 |
| H | 14.05860500 | 8.27650400  | 46.30521200 | C  | 25.25703000 | 6.83217400  | 48.96881900 |
| H | 12.91687800 | 8.26531700  | 43.44980500 | C  | 24.22855000 | 7.40972200  | 49.65320200 |
| H | 15.41820600 | 8.04647100  | 43.45949900 | C  | 23.13794700 | 7.56169900  | 48.72152700 |
| H | 14.89529500 | 9.61220000  | 42.83713700 | C  | 20.78665000 | 8.11795900  | 48.20316900 |
| H | 13.35113000 | 5.84927200  | 44.76170600 | C  | 19.44464200 | 8.46710000  | 48.61877500 |
| N | 29.95413900 | -1.27781000 | 45.37231800 | C  | 18.63262300 | 8.26881700  | 47.54506900 |
| C | 30.57983800 | -0.90828400 | 44.11208400 | C  | 19.48748400 | 7.83386800  | 46.46297300 |
| C | 29.62034100 | -0.07787300 | 43.26132000 | C  | 19.85461300 | 7.18404800  | 44.11730500 |
| O | 28.41372100 | -0.04445600 | 43.50638700 | C  | 19.39612900 | 6.98455200  | 42.76138800 |
| H | 29.01338400 | -1.63607500 | 45.19578300 | C  | 20.50375300 | 6.71980400  | 42.01547600 |
| H | 31.49659600 | -0.33385700 | 44.30685800 | C  | 21.63329800 | 6.72063200  | 42.91697800 |
| N | 30.14612700 | 0.59067100  | 42.20310000 | N  | 23.94720900 | 6.39999000  | 44.76933700 |
| C | 29.27156000 | 1.15690700  | 41.17190600 | N  | 23.50705200 | 7.08832300  | 47.48582700 |
| C | 28.76196100 | 0.02754100  | 40.24265800 | N  | 20.78856700 | 7.74911600  | 46.88371500 |
| O | 29.38800300 | -1.03231200 | 40.13523800 | N  | 21.21555700 | 7.00086600  | 44.19223900 |
| C | 30.23150200 | 2.09850800  | 40.42072100 | Fe | 22.38368600 | 7.15008800  | 45.81527300 |
| C | 31.55435500 | 1.30958400  | 40.42804700 | O  | 21.65011800 | 5.16913800  | 46.28160500 |
| C | 31.55520100 | 0.58272500  | 41.79065900 | C  | 23.00354900 | -1.67455200 | 41.15071500 |
| H | 31.54588900 | 0.56902200  | 39.62394000 | N  | 24.19617500 | -0.84205000 | 41.15843400 |
| H | 28.42854900 | 1.67277600  | 41.63523800 | C  | 24.85779700 | -0.25028800 | 42.19498900 |
| H | 32.16933700 | 1.11266600  | 42.53205000 | O  | 25.70072700 | 0.62106100  | 42.00318900 |
| H | 31.93615700 | -0.44019500 | 41.69740900 | C  | 24.63972700 | -0.73771800 | 43.64694400 |
| H | 32.43567000 | 1.94688200  | 40.30131300 | N  | 25.92391900 | -1.24223800 | 44.13008100 |
| H | 30.33304300 | 3.03695100  | 40.97901300 | C  | 26.08952300 | -2.44805400 | 44.72324400 |
| H | 29.87264800 | 2.33782800  | 39.41622600 | O  | 27.14792200 | -2.89845400 | 45.14431000 |
| N | 27.65852100 | 0.32828700  | 39.53324400 | C  | 24.11634900 | 0.34136400  | 44.60244600 |
| C | 27.06305000 | -0.64866000 | 38.63027500 | C  | 24.34737500 | 1.68741400  | 44.45406300 |
| C | 25.97019500 | -0.01659500 | 37.75967200 | C  | 23.74343400 | 2.61090900  | 45.34978500 |
| O | 24.89166500 | 0.47863700  | 38.56307200 | C  | 23.16287900 | 2.13635700  | 46.63535800 |
| C | 25.41211800 | -1.02404700 | 36.75851000 | C  | 22.96799800 | 0.68477700  | 46.75698800 |
| H | 26.63215000 | -1.48407600 | 39.19950500 | C  | 23.42217200 | -0.14435900 | 45.78929200 |
| H | 24.66730900 | -0.54138400 | 36.11638800 | O  | 22.86266000 | 2.91896200  | 47.54161600 |
| H | 26.20914600 | -1.42339700 | 36.11943600 | C  | 21.79081300 | -0.86748600 | 40.57156800 |
| H | 27.13990100 | 1.19468500  | 39.71477600 | C  | 21.50495100 | 0.29158100  | 41.50325100 |
| H | 26.41163200 | 0.83420000  | 37.22165900 | C  | 20.77209800 | 0.07460300  | 42.67549400 |
| H | 24.92931300 | -1.85336000 | 37.28311000 | C  | 20.82082600 | 1.00491800  | 43.71000200 |
| H | 25.17112300 | 1.39307300  | 38.84645000 | C  | 21.61385000 | 2.18656700  | 43.59805100 |
| C | 24.69314800 | 9.49805800  | 45.52012200 | C  | 22.19584100 | 2.45438500  | 42.33449900 |
| S | 22.88531800 | 9.27952600  | 45.34043900 | C  | 22.15018200 | 1.52548900  | 41.31048300 |
| H | 24.91314100 | 10.55009800 | 45.30666100 | O  | 21.88109900 | 2.94747000  | 44.63075900 |
| H | 25.02599600 | 9.26722200  | 46.53560500 | Cl | 19.91316100 | 0.72700800  | 45.17135000 |
| C | 22.93652900 | 6.41189500  | 42.53785100 | C  | 23.26267000 | -2.93645400 | 40.29250600 |
| H | 23.11218300 | 6.24319800  | 41.48053300 | O  | 23.91309100 | -2.82364100 | 39.26371600 |
| C | 25.58842800 | 6.15356600  | 46.57614800 | C  | 22.77893600 | -4.26777300 | 40.75116200 |

|   |             |             |             |   |             |             |             |
|---|-------------|-------------|-------------|---|-------------|-------------|-------------|
| O | 20.71358200 | -1.77222000 | 40.43091400 | H | 22.67545300 | 1.65569100  | 35.94847400 |
| C | 21.78285300 | -4.44771200 | 41.72696800 | H | 22.00381400 | 0.24328300  | 35.12525500 |
| C | 21.38121700 | -5.72146400 | 42.11172800 | H | 19.17903100 | 0.44998800  | 38.53662100 |
| C | 21.98134700 | -6.84379400 | 41.52905300 | O | 20.14298900 | -1.37219400 | 36.21868700 |
| C | 22.97068500 | -6.68262900 | 40.54921400 | N | 19.35187200 | -0.48452900 | 38.17525800 |
| C | 23.35485500 | -5.40575100 | 40.16251500 | H | 18.48923600 | -0.99216800 | 37.99151200 |
| O | 21.56356800 | -8.07335700 | 41.94965500 | N | 20.72208900 | 4.18620000  | 36.08886700 |
| H | 22.75254600 | -1.96478000 | 42.17112000 | C | 20.39702500 | 5.31613000  | 36.95717900 |
| H | 24.48420300 | -0.47261400 | 40.23849100 | H | 20.09645400 | 6.16416200  | 36.32687700 |
| H | 23.93883200 | -1.57678600 | 43.68846900 | C | 21.56885000 | 5.72472400  | 37.85914900 |
| H | 26.76446800 | -0.68088600 | 43.94502300 | H | 21.27849800 | 6.64193400  | 38.38978600 |
| H | 24.91236200 | 2.04944400  | 43.60444200 | C | 21.99471500 | 4.64710800  | 38.85807300 |
| H | 24.02351900 | 3.65656400  | 45.31235100 | H | 19.52620000 | 5.02383600  | 37.54764300 |
| H | 22.47553300 | 0.32355700  | 47.65351300 | H | 22.19142300 | 3.69905700  | 38.34463700 |
| H | 23.28062800 | -1.21833700 | 45.89008000 | H | 22.42766300 | 5.99248900  | 37.23089700 |
| H | 22.19528700 | 4.65627100  | 46.91484500 | H | 21.57227600 | 4.26444200  | 35.53645600 |
| H | 22.11859900 | -0.48721300 | 39.59716000 | H | 22.92769400 | 4.93478000  | 39.35013500 |
| H | 20.20247700 | -0.84147100 | 42.79297300 | H | 21.21928300 | 4.47056900  | 39.61350400 |
| H | 22.74081700 | 3.38660000  | 42.22890300 | C | 15.79756900 | 3.12069200  | 36.06322600 |
| H | 22.68251800 | 1.71741000  | 40.38318800 | C | 15.64460700 | 3.84298500  | 37.39552800 |
| H | 21.62484200 | 4.60005100  | 45.48476400 | O | 14.58060100 | 4.40273000  | 37.70732700 |
| H | 20.10636600 | -1.39486400 | 39.75849100 | C | 15.86678600 | 1.58308700  | 36.22142700 |
| H | 21.27761500 | -3.58909200 | 42.15363900 | C | 14.73830000 | 0.94927700  | 37.05666100 |
| H | 20.60074600 | -5.86652300 | 42.85166900 | C | 13.35256300 | 1.16462000  | 36.43049900 |
| H | 23.43340500 | -7.55740200 | 40.09440600 | C | 15.00432300 | -0.54459400 | 37.29225100 |
| H | 24.11264200 | -5.26185400 | 39.39944800 | H | 16.03506600 | -0.71114200 | 37.63596000 |
| H | 22.04812800 | -8.75298100 | 41.45520400 | H | 14.34557900 | -0.91936500 | 38.08163500 |
| H | 25.24413600 | 8.87260700  | 44.81256800 | H | 14.86076800 | -1.13870600 | 36.37724300 |
| H | 13.01889600 | 9.68169200  | 44.49189000 | H | 13.29907200 | 0.74713300  | 35.41302600 |
| H | 15.54603400 | 9.48050900  | 44.49257900 | H | 12.58400700 | 0.67313600  | 37.03808500 |
| H | 30.47876300 | -2.04015600 | 45.79583000 | H | 13.09710400 | 2.22882500  | 36.38217600 |
| H | 30.88558700 | -1.75950000 | 43.46952600 | H | 14.94439500 | 3.41745200  | 35.44739800 |
| H | 25.14224600 | -3.02222200 | 44.80269800 | H | 14.71512900 | 1.42129700  | 38.04756000 |
| H | 20.56515700 | 6.51060400  | 40.95504200 | H | 16.83457300 | 1.33398900  | 36.67450000 |
| H | 18.36223900 | 7.01637600  | 42.44181300 | H | 15.88266400 | 1.14100300  | 35.21243100 |
| H | 17.55712900 | 8.35160900  | 47.46389200 | N | 16.74068900 | 3.85270300  | 38.20011600 |
| H | 19.17309500 | 8.77842500  | 49.62029800 | C | 16.67957300 | 4.06559800  | 39.65437200 |
| H | 24.19179400 | 7.69916400  | 50.69653500 | C | 16.47401400 | 5.51814900  | 40.11930600 |
| H | 26.23925700 | 6.55595600  | 49.33257100 | O | 16.65308400 | 5.83131400  | 41.29718200 |
| H | 27.10024500 | 5.41723200  | 44.26224400 | C | 17.90866800 | 3.44202400  | 40.31884700 |
| H | 27.85481900 | -1.06871600 | 37.99786700 | H | 17.59106100 | 3.42416500  | 37.83643400 |
| H | 25.01951200 | 5.74591400  | 36.89626800 | H | 15.78616600 | 3.52665200  | 40.01270400 |
| H | 16.73666800 | 3.43521300  | 35.62723000 | H | 18.84070400 | 3.82414700  | 39.88595600 |
| H | 11.54648200 | 5.05533900  | 40.21983200 | H | 17.90553000 | 3.68095600  | 41.38365900 |
|   |             |             |             | H | 17.88745900 | 2.35382400  | 40.19882800 |
|   |             |             |             | N | 15.99496700 | 6.40076000  | 39.18744100 |
| C | 25.05818000 | 5.99788000  | 35.83587900 | C | 15.29097000 | 7.58908100  | 39.63297500 |
| S | 24.35833700 | 4.59181300  | 34.89109700 | C | 13.88867400 | 7.34641900  | 40.22642800 |
| C | 25.43546300 | 3.25682900  | 35.53452700 | O | 13.30851200 | 8.26888900  | 40.79577500 |
| H | 24.38462200 | 6.85045800  | 35.70813100 | H | 15.64006400 | 5.97473600  | 38.33785500 |
| H | 25.45877300 | 3.27119100  | 36.62906600 | H | 15.86912900 | 8.07542000  | 40.42040100 |
| H | 25.02561800 | 2.30581200  | 35.18271000 | H | 15.20151200 | 8.29348300  | 38.79948800 |
| H | 26.45215900 | 3.36778200  | 35.14371600 | N | 13.37819600 | 6.09446300  | 40.08276900 |
| H | 26.04459300 | 6.26605700  | 35.44317100 | C | 12.18734100 | 5.67769700  | 40.80343800 |
| H | 21.02647000 | 2.37671400  | 34.27605100 | C | 12.47666100 | 4.86901100  | 42.08836300 |
| C | 20.65041500 | 1.91519800  | 35.19714900 | O | 11.95610400 | 5.19567100  | 43.16241600 |
| C | 20.11391900 | 2.97854400  | 36.14747500 | H | 13.85384400 | 5.41605500  | 39.49257800 |
| O | 19.18212700 | 2.71508200  | 36.92514600 | H | 11.63666800 | 6.57116200  | 41.09696400 |
| C | 21.76825900 | 1.05379800  | 35.82329300 | N | 13.29523200 | 3.80648100  | 41.93077600 |
| C | 21.41331200 | 0.44039500  | 37.18290700 | C | 13.38937100 | 2.73477300  | 42.92221000 |
| C | 20.25033400 | -0.54220500 | 37.10546000 | C | 13.84888800 | 3.20277200  | 44.30829600 |
| H | 22.29238700 | -0.10864500 | 37.54117900 | O | 13.42660600 | 2.66508200  | 45.32591200 |
| H | 19.80354600 | 1.27532400  | 34.93204400 | C | 14.35597600 | 1.62816400  | 42.42009100 |
| H | 21.21184900 | 1.22248000  | 37.92162900 |   |             |             |             |

<sup>2</sup>IM3<sub>Cyc</sub>

|   |             |             |             |    |             |             |             |
|---|-------------|-------------|-------------|----|-------------|-------------|-------------|
| C | 14.21484900 | 1.19279000  | 40.92719000 | C  | 24.71958800 | 9.25781000  | 45.71336300 |
| O | 14.19705100 | 2.16170400  | 40.07961300 | S  | 22.90780700 | 9.14109100  | 45.48529200 |
| O | 14.19592700 | -0.01989000 | 40.67664100 | H  | 24.99523300 | 10.30855900 | 45.56956900 |
| H | 13.57659900 | 3.45484700  | 40.99107000 | H  | 25.01626400 | 8.94902500  | 46.71943100 |
| H | 12.39590000 | 2.30053300  | 43.08946500 | C  | 22.89778000 | 6.36971900  | 42.59500300 |
| H | 14.23584500 | 0.75543100  | 43.06595200 | H  | 23.09567900 | 6.23189800  | 41.53704100 |
| H | 15.38654600 | 1.99024800  | 42.54515800 | C  | 25.41665400 | 5.84334100  | 46.69194800 |
| N | 14.80286800 | 4.18600000  | 44.31563700 | H  | 26.41003400 | 5.48680900  | 46.94903200 |
| C | 15.33665500 | 4.72283600  | 45.55638100 | C  | 21.74956500 | 7.87310800  | 49.13024800 |
| C | 15.04782000 | 6.22977000  | 45.70144000 | H  | 21.58961000 | 8.17542500  | 50.16150100 |
| O | 15.84396700 | 6.98154300  | 46.27337000 | C  | 18.98471700 | 7.61153800  | 45.17073600 |
| C | 16.82345500 | 4.40585500  | 45.77220400 | H  | 17.92808400 | 7.75177400  | 44.96893700 |
| C | 17.19895000 | 4.43337400  | 47.25733800 | C  | 23.93872700 | 6.12330100  | 43.48246100 |
| H | 14.78546200 | 4.21651400  | 46.35711400 | C  | 25.26570300 | 5.65708000  | 43.09266300 |
| H | 15.09423600 | 4.58523700  | 43.42973900 | C  | 25.93860100 | 5.46094700  | 44.26724200 |
| H | 17.46949500 | 5.07531900  | 45.19499100 | C  | 25.06004600 | 5.83287900  | 45.34836100 |
| H | 17.00304700 | 3.38452200  | 45.41305900 | C  | 25.75722400 | 5.45601300  | 41.68430600 |
| O | 16.37658500 | 4.24258000  | 48.14740900 | H  | 26.80788800 | 5.76978000  | 41.62721100 |
| N | 18.52963700 | 4.58039800  | 47.52152700 | H  | 25.21573600 | 6.10247600  | 40.98790500 |
| H | 18.78251100 | 4.68108500  | 48.49484300 | C  | 25.64364300 | 4.01313500  | 41.15082300 |
| H | 19.20839100 | 4.90871800  | 46.84488600 | H  | 26.40203900 | 3.35772400  | 41.59036600 |
| N | 13.85209900 | 6.63843600  | 45.20965100 | H  | 24.67970800 | 3.58204900  | 41.45260400 |
| C | 13.36460700 | 8.00125400  | 45.36803500 | C  | 25.69038300 | 3.91024900  | 39.60465200 |
| H | 12.32200900 | 7.94952100  | 45.70908300 | O  | 26.03812300 | 2.77355000  | 39.12659300 |
| C | 13.44376500 | 8.84754500  | 44.08906400 | O  | 25.34416900 | 4.90913200  | 38.94258500 |
| C | 14.87044100 | 9.09343100  | 43.59112200 | C  | 24.62865800 | 6.34661400  | 47.72300700 |
| H | 13.95978900 | 8.45606000  | 46.16539700 | C  | 25.05450900 | 6.46610200  | 49.09570800 |
| H | 12.86575700 | 8.36624600  | 43.29249900 | C  | 24.03861500 | 7.07626800  | 49.77081900 |
| H | 15.36758300 | 8.14730200  | 43.34998700 | C  | 22.98352200 | 7.31311600  | 48.81639900 |
| H | 14.85447900 | 9.69542800  | 42.67689700 | C  | 20.67976100 | 8.00850300  | 48.25391300 |
| H | 13.27636900 | 5.98410400  | 44.68337000 | C  | 19.34796800 | 8.42012100  | 48.64356700 |
| N | 30.22793100 | -1.20172300 | 45.18586000 | C  | 18.55625100 | 8.29454800  | 47.54406300 |
| C | 30.77569700 | -0.80778800 | 43.89679700 | C  | 19.41513100 | 7.84066200  | 46.47314400 |
| C | 29.75715300 | 0.01536900  | 43.11000100 | C  | 19.81236300 | 7.23322100  | 44.12096900 |
| O | 28.56903900 | 0.04232000  | 43.43203000 | C  | 19.38247500 | 7.09901100  | 42.74817600 |
| H | 29.28815500 | -1.58173400 | 45.05366500 | C  | 20.49644600 | 6.80704100  | 42.02206100 |
| H | 31.69251000 | -0.21976300 | 44.04614900 | C  | 21.59980700 | 6.72441400  | 42.95134600 |
| N | 30.21206100 | 0.68542500  | 42.01867900 | N  | 23.84071800 | 6.23090600  | 44.85111200 |
| C | 29.27379800 | 1.22839500  | 41.03315300 | N  | 23.36188400 | 6.85837300  | 47.57613300 |
| C | 28.74109800 | 0.08308700  | 40.13574300 | N  | 20.69808900 | 7.67412400  | 46.92514400 |
| O | 29.36037900 | -0.98071500 | 40.03376700 | N  | 21.16058800 | 6.98056900  | 44.22534900 |
| C | 30.17244700 | 2.18735200  | 40.23094400 | Fe | 22.28956400 | 7.02815100  | 45.88144400 |
| C | 31.50819600 | 1.42260100  | 40.16555300 | O  | 21.43024400 | 5.05878500  | 46.26466600 |
| C | 31.59337300 | 0.68575900  | 41.52128300 | C  | 23.05467300 | -1.73602100 | 41.23761100 |
| H | 31.47434200 | 0.68849100  | 39.35592600 | N  | 24.22702100 | -0.87669300 | 41.21158100 |
| H | 28.44423300 | 1.72607500  | 41.53858900 | C  | 24.96029300 | -0.32607500 | 42.22253700 |
| H | 32.24983600 | 1.21198600  | 42.22814700 | O  | 25.79232000 | 0.54964500  | 42.00171300 |
| H | 31.97115000 | -0.33508400 | 41.39686100 | C  | 24.81974500 | -0.82760900 | 43.67958600 |
| H | 32.36967900 | 2.07753700  | 39.99869000 | N  | 26.13716400 | -1.26023600 | 44.13475800 |
| H | 30.28739800 | 3.12744300  | 40.78367800 | C  | 26.39651000 | -2.49081600 | 44.63562100 |
| H | 29.75486800 | 2.41941700  | 39.24773200 | O  | 27.48984800 | -2.90158000 | 45.00588700 |
| N | 27.62273700 | 0.37332800  | 39.44413800 | C  | 24.22274800 | 0.22902500  | 44.61730900 |
| C | 26.99354700 | -0.63028200 | 38.59492300 | C  | 24.07115500 | 1.52837500  | 44.29855900 |
| C | 25.84797200 | -0.03235300 | 37.76953000 | C  | 23.32302000 | 2.48942300  | 45.18138600 |
| O | 24.80371800 | 0.46735700  | 38.61624000 | C  | 23.01512800 | 1.97413700  | 46.60059800 |
| C | 25.25013800 | -1.07211100 | 36.82628400 | C  | 23.23770200 | 0.55422000  | 46.87388500 |
| H | 26.60674700 | -1.45908600 | 39.20370000 | C  | 23.79379000 | -0.24678300 | 45.93830500 |
| H | 24.46917100 | -0.61572500 | 36.20858600 | O  | 22.59038400 | 2.74891900  | 47.45414100 |
| H | 26.01796200 | -1.48327000 | 36.15968900 | C  | 21.83165100 | -0.98600400 | 40.60131900 |
| H | 27.10392600 | 1.23859800  | 39.62836000 | C  | 21.48969000 | 0.19852500  | 41.48217200 |
| H | 26.24777800 | 0.81033500  | 37.18865900 | C  | 20.79531800 | -0.01107800 | 42.68043300 |
| H | 24.80492400 | -1.89054700 | 37.39933600 | C  | 20.84712400 | 0.94344900  | 43.69326500 |
| H | 25.09146000 | 1.38193200  | 38.88811200 | C  | 21.61338400 | 2.10488700  | 43.51619100 |



|                               |             |             |             |   |             |             |             |
|-------------------------------|-------------|-------------|-------------|---|-------------|-------------|-------------|
| C                             | 22.09541900 | 2.40920600  | 42.24356100 | O | 19.05420400 | 1.92473000  | 37.46629400 |
| C                             | 22.05143400 | 1.45382300  | 41.23107900 | C | 21.72479800 | 0.35875300  | 36.25086500 |
| O                             | 22.01420200 | 2.88272600  | 44.58737200 | C | 21.49417600 | -0.26781500 | 37.63146900 |
| Cl                            | 20.04698800 | 0.63561000  | 45.21968700 | C | 20.36403200 | -1.28707200 | 37.64159900 |
| C                             | 23.34374400 | -3.03776900 | 40.44972600 | H | 22.41067300 | -0.78469700 | 37.93611400 |
| O                             | 24.00167100 | -2.97041600 | 39.42160800 | H | 19.68961600 | 0.47902400  | 35.50055100 |
| C                             | 22.87857800 | -4.35181800 | 40.97438900 | H | 21.31221100 | 0.51662900  | 38.37259200 |
| O                             | 20.78398400 | -1.92802100 | 40.47046900 | H | 22.60640300 | 1.00555200  | 36.32215100 |
| C                             | 21.88452200 | -4.49694200 | 41.95787600 | H | 21.95692200 | -0.43712700 | 35.53449600 |
| C                             | 21.49788200 | -5.75544700 | 42.40367900 | H | 19.16906800 | -0.10048100 | 38.78553600 |
| C                             | 22.11139600 | -6.89720000 | 41.87539900 | O | 20.32036300 | -2.24438100 | 36.88840900 |
| C                             | 23.09973800 | -6.77128400 | 40.88941400 | N | 19.40312100 | -1.08195000 | 38.63987000 |
| C                             | 23.46907200 | -5.50989300 | 40.44216700 | H | 18.57687400 | -1.65771400 | 38.49645500 |
| O                             | 21.70765500 | -8.11034600 | 42.35392200 | N | 20.59873200 | 3.40585300  | 36.65343200 |
| H                             | 22.79879900 | -1.97169600 | 42.27125200 | C | 20.25784200 | 4.54010700  | 37.51115900 |
| H                             | 24.47350900 | -0.48740100 | 40.28850900 | H | 20.19112600 | 5.42884200  | 36.87043000 |
| H                             | 24.16830000 | -1.70769300 | 43.73564600 | C | 21.26795800 | 4.78966900  | 38.63792600 |
| H                             | 26.93973600 | -0.65042300 | 43.93707900 | H | 20.96046500 | 5.71366800  | 39.14747800 |
| H                             | 24.45106000 | 1.90915900  | 43.36005800 | C | 21.36959200 | 3.64369400  | 39.64429300 |
| H                             | 23.87176900 | 3.43082500  | 45.28102700 | H | 19.26168600 | 4.35388000  | 37.91796000 |
| H                             | 22.93538100 | 0.18658300  | 47.84931300 | H | 21.71024500 | 2.72657500  | 39.15073400 |
| H                             | 23.95279000 | -1.29907000 | 46.16668200 | H | 22.26531000 | 4.97983200  | 38.22815900 |
| H                             | 21.92903500 | 4.47987800  | 46.88134700 | H | 21.43261900 | 3.51304100  | 36.07813400 |
| H                             | 22.16992800 | -0.63449000 | 39.61967200 | H | 22.10423900 | 3.88828700  | 40.41603900 |
| H                             | 20.27110100 | -0.94682800 | 42.84474700 | H | 20.40955100 | 3.43509500  | 40.13113800 |
| H                             | 22.60579300 | 3.35634100  | 42.10424400 | C | 16.09165200 | 3.33894000  | 35.96737100 |
| H                             | 22.54566300 | 1.65172600  | 40.28432800 | C | 15.88019000 | 4.00803100  | 37.31772000 |
| H                             | 21.43513100 | 4.54716300  | 45.43225300 | O | 15.05764000 | 4.92302500  | 37.46688300 |
| H                             | 20.16020000 | -1.56345400 | 39.80700900 | C | 15.50723600 | 1.90598900  | 35.92692400 |
| H                             | 21.36990100 | -3.62525300 | 42.34489300 | C | 14.03453500 | 1.78115000  | 36.36404800 |
| H                             | 20.71926700 | -5.87393300 | 43.15027600 | C | 13.08466800 | 2.56686400  | 35.44801900 |
| H                             | 23.57347200 | -7.66128300 | 40.47743300 | C | 13.61157100 | 0.30765300  | 36.65410600 |
| H                             | 24.22597500 | -5.39359500 | 39.67350700 | H | 14.34597100 | -0.27930200 | 37.02255300 |
| H                             | 22.20046300 | -8.80680600 | 41.89213700 | H | 12.66062200 | 0.22886800  | 36.99284600 |
| H                             | 25.25503400 | 8.64942500  | 44.97951200 | H | 13.50907700 | -0.15334300 | 35.46184600 |
| H                             | 12.95164700 | 9.80999500  | 44.29702900 | H | 13.15702000 | 2.22697000  | 34.40311000 |
| H                             | 15.47770400 | 9.60881800  | 44.34575800 | H | 12.04769000 | 2.43024900  | 35.77570900 |
| H                             | 30.79180500 | -1.95707400 | 45.56999200 | H | 13.29521900 | 3.64167700  | 35.47758900 |
| H                             | 31.05831300 | -1.64695500 | 43.22877500 | H | 15.61801800 | 3.98031600  | 35.21958300 |
| H                             | 25.48831900 | -3.12796800 | 44.69861900 | H | 13.92120800 | 2.19842400  | 37.37352400 |
| H                             | 20.57634200 | 6.63196300  | 40.95665500 | H | 16.12795600 | 1.26688100  | 36.56916000 |
| H                             | 18.36069900 | 7.18844800  | 42.40240800 | H | 15.63186200 | 1.52014300  | 34.90265800 |
| H                             | 17.48926900 | 8.43673500  | 47.43877700 | N | 16.65420800 | 3.54721200  | 38.34075500 |
| H                             | 19.06600000 | 8.71974400  | 49.64576400 | C | 16.28930600 | 3.69841900  | 39.75552800 |
| H                             | 23.98825300 | 7.33623700  | 50.82132800 | C | 16.50908200 | 5.09515000  | 40.35760100 |
| H                             | 26.01099300 | 6.12838600  | 49.47588900 | O | 16.35638500 | 5.28800400  | 41.56731800 |
| H                             | 26.95852200 | 5.11647300  | 44.39451400 | C | 16.99256700 | 2.62346200  | 40.58847100 |
| H                             | 27.75503200 | -1.05374900 | 37.92827500 | H | 17.38352000 | 2.87121300  | 38.11670800 |
| H                             | 25.13422800 | 5.72750200  | 36.89475200 | H | 15.19998000 | 3.53336800  | 39.81734300 |
| H                             | 16.71293600 | 3.46436900  | 35.56424700 | H | 18.08087600 | 2.66346100  | 40.45775800 |
| H                             | 11.56175600 | 5.06875200  | 40.13870200 | H | 16.76800700 | 2.77873600  | 41.64531600 |
| <sup>2</sup> P <sub>Cyc</sub> |             |             |             | H | 16.63853600 | 1.63056700  | 40.29337500 |
| C                             | 24.33453000 | 5.79698400  | 36.07444200 | N | 16.79779800 | 6.10805300  | 39.48639700 |
| S                             | 23.80856300 | 4.31791700  | 35.12903600 | C | 16.52863200 | 7.48576800  | 39.86273000 |
| C                             | 25.09158200 | 3.14323000  | 35.70102600 | C | 15.04020000 | 7.84175200  | 40.05595900 |
| H                             | 23.54456700 | 6.54755500  | 35.97786400 | O | 14.74398400 | 8.89521600  | 40.61532000 |
| H                             | 25.14004200 | 3.12260400  | 36.79494200 | H | 16.66586500 | 5.88309500  | 38.50917000 |
| H                             | 24.82187800 | 2.15369400  | 35.32107600 | H | 17.01581900 | 7.71089100  | 40.81278500 |
| H                             | 26.06887900 | 3.42126000  | 35.29302500 | H | 16.95870100 | 8.15010600  | 39.10646200 |
| H                             | 25.26091000 | 6.20302100  | 35.65491500 | N | 14.13468200 | 6.94428700  | 39.58584800 |
| H                             | 20.80453200 | 1.64067300  | 34.76641400 | C | 12.73436100 | 7.02291900  | 39.96896500 |
| C                             | 20.52059900 | 1.15955600  | 35.71037000 | C | 12.38929600 | 6.16113300  | 41.20500700 |
| C                             | 19.98929900 | 2.20178400  | 36.69158900 | O | 11.86893600 | 6.67207200  | 42.20538700 |

|   |             |             |             |    |             |             |             |
|---|-------------|-------------|-------------|----|-------------|-------------|-------------|
| H | 14.44175400 | 6.14557500  | 39.03327900 | H  | 26.76737800 | -1.28754900 | 39.28857500 |
| H | 12.50175600 | 8.05834800  | 40.21713000 | H  | 24.45525500 | -0.82412200 | 36.32476800 |
| N | 12.69207600 | 4.85106500  | 41.09173500 | H  | 26.08019500 | -1.53388300 | 36.24564700 |
| C | 12.17771900 | 3.84292100  | 42.01551400 | H  | 27.06884000 | 1.37113300  | 39.62432600 |
| C | 12.58793900 | 4.06968400  | 43.47552200 | H  | 26.12825000 | 0.80514300  | 37.16325600 |
| O | 11.84611300 | 3.74534100  | 44.39678800 | H  | 24.95876800 | -2.00613500 | 37.54778600 |
| C | 12.64483600 | 2.42463300  | 41.58252200 | H  | 24.99043000 | 1.34426100  | 38.91387600 |
| C | 12.62568000 | 2.11041200  | 40.05212900 | C  | 24.23044700 | 9.26944600  | 45.74819100 |
| O | 13.23328000 | 2.97914800  | 39.32039300 | S  | 22.45238900 | 8.85073500  | 45.64559000 |
| O | 12.09923300 | 1.05419000  | 39.68006100 | H  | 24.32230100 | 10.33535100 | 45.51240800 |
| H | 12.99263700 | 4.41549800  | 40.19410700 | H  | 24.62740700 | 9.09561000  | 46.75240800 |
| H | 11.08140800 | 3.87749100  | 42.02321300 | C  | 22.71477800 | 5.92543600  | 42.87952600 |
| H | 12.03528700 | 1.69130400  | 42.11512500 | H  | 22.88438600 | 5.75609600  | 41.82074500 |
| H | 13.68471000 | 2.29035500  | 41.91296100 | C  | 25.51649300 | 6.07181100  | 46.82300600 |
| N | 13.84634500 | 4.57771100  | 43.66597400 | H  | 26.57400900 | 5.92491600  | 47.02647200 |
| C | 14.38330200 | 4.80055600  | 44.99457500 | C  | 21.68281600 | 7.54057200  | 49.40854500 |
| C | 14.56960200 | 6.29689800  | 45.31849000 | H  | 21.52630500 | 7.83941600  | 50.44130100 |
| O | 15.44140100 | 6.66082300  | 46.12044500 | C  | 18.80343900 | 6.90197500  | 45.57066700 |
| C | 15.68401900 | 4.02153700  | 45.24857500 | H  | 17.73363800 | 6.98177600  | 45.39790200 |
| C | 15.97911100 | 3.87926700  | 46.74193200 | C  | 23.82131800 | 5.88368200  | 43.71607200 |
| H | 13.62653700 | 4.41534700  | 45.68814200 | C  | 25.17816300 | 5.58644200  | 43.26307700 |
| H | 14.41640200 | 4.81662100  | 42.85944400 | C  | 25.94621300 | 5.59740500  | 44.39100700 |
| H | 16.52292700 | 4.46531600  | 44.70250600 | C  | 25.08761300 | 5.91972800  | 45.50593700 |
| H | 15.53937000 | 3.00580300  | 44.86198100 | C  | 25.58603900 | 5.33496000  | 41.83985800 |
| O | 15.12849700 | 3.50126500  | 47.53672800 | H  | 26.65537300 | 5.55857800  | 41.73291000 |
| N | 17.28682500 | 4.09133000  | 47.10722400 | H  | 25.05665400 | 6.01897300  | 41.16784300 |
| H | 17.44198600 | 4.14564700  | 48.10672600 | C  | 25.31753400 | 3.90276600  | 41.32357600 |
| H | 17.83445200 | 4.74513900  | 46.56178700 | H  | 26.05765500 | 3.18949300  | 41.69546100 |
| N | 13.69861800 | 7.13861900  | 44.71941700 | H  | 24.34586500 | 3.55820300  | 41.70548900 |
| C | 13.66259900 | 8.56874800  | 44.99643200 | C  | 25.22408000 | 3.83828000  | 39.77680600 |
| H | 12.61304000 | 8.85433000  | 45.14476500 | O  | 25.74678300 | 2.81681800  | 39.21008400 |
| C | 14.28004600 | 9.43185800  | 43.88602300 | O  | 24.61714400 | 4.76968700  | 39.20598900 |
| C | 15.78355000 | 9.21563600  | 43.69924000 | C  | 24.70974500 | 6.49740700  | 47.88229100 |
| H | 14.19314100 | 8.72018800  | 45.94117200 | C  | 25.17632600 | 6.73083200  | 49.22820600 |
| H | 13.76913900 | 9.22783500  | 42.93849600 | C  | 24.10085300 | 7.16584500  | 49.94461800 |
| H | 15.99139900 | 8.17152000  | 43.44214500 | C  | 22.97549800 | 7.18670100  | 49.04185800 |
| H | 16.16056200 | 9.83368200  | 42.87868000 | C  | 20.56539500 | 7.50676400  | 48.58209500 |
| H | 13.06459300 | 6.77669100  | 44.00908600 | C  | 19.21457300 | 7.78652100  | 49.01978000 |
| N | 31.20219500 | -0.76827300 | 44.49287400 | C  | 18.40047200 | 7.58330800  | 47.94741900 |
| C | 31.54091400 | -0.22324000 | 43.18666700 | C  | 19.26143600 | 7.19434500  | 46.85273800 |
| C | 30.32893000 | 0.47346200  | 42.57172300 | C  | 19.62125700 | 6.55096700  | 44.50473500 |
| O | 29.19536300 | 0.28602000  | 43.01864500 | C  | 19.15328100 | 6.32549700  | 43.15752500 |
| H | 30.31043000 | -1.26477900 | 44.43214100 | C  | 20.25928000 | 6.08939000  | 42.39997200 |
| H | 32.37346700 | 0.48849900  | 43.28221900 | C  | 21.39990900 | 6.14433200  | 43.28441000 |
| N | 30.54243200 | 1.27210500  | 41.49509000 | N  | 23.79343900 | 6.08484100  | 45.07704500 |
| C | 29.41449500 | 1.69593400  | 40.65829200 | N  | 23.37044700 | 6.77515600  | 47.79147600 |
| C | 28.92629300 | 0.49423500  | 39.81082200 | N  | 20.56823300 | 7.15381300  | 47.25890200 |
| O | 29.67925900 | -0.45797700 | 39.58113000 | N  | 20.99027300 | 6.40977400  | 44.56676800 |
| C | 30.05842300 | 2.77952900  | 39.77402900 | Fe | 22.19349500 | 6.68780300  | 46.15915100 |
| C | 31.46758300 | 2.21387100  | 39.51770700 | O  | 21.73528100 | 4.67734600  | 46.71056800 |
| C | 31.83527300 | 1.49997000  | 40.83645900 | C  | 23.32548800 | -1.77534500 | 41.60603800 |
| H | 31.42708400 | 1.47889500  | 38.70933600 | N  | 24.40409400 | -0.81654300 | 41.43360500 |
| H | 28.60111200 | 2.06973700  | 41.28275900 | C  | 25.42191300 | -0.41097500 | 42.25917000 |
| H | 32.47798500 | 2.12581300  | 41.47152600 | O  | 26.20501500 | 0.45924900  | 41.89789200 |
| H | 32.35641600 | 0.55529500  | 40.64702200 | C  | 25.66295000 | -1.03023100 | 43.67202000 |
| H | 32.19826400 | 2.98355400  | 39.24831900 | N  | 27.04730300 | -1.47700500 | 43.68455100 |
| H | 30.11115300 | 3.72257900  | 40.33149800 | C  | 27.48694600 | -2.53293900 | 44.40647100 |
| H | 29.48690400 | 2.95743800  | 38.85934100 | O  | 28.66093300 | -2.84062900 | 44.58575300 |
| N | 27.68139500 | 0.61307400  | 39.31156400 | C  | 25.34937600 | 0.03228500  | 44.73011500 |
| C | 27.06237500 | -0.49077900 | 38.59106100 | C  | 24.00929500 | 0.23388400  | 45.04505900 |
| C | 25.82896300 | -0.03857100 | 37.80181300 | C  | 23.57893000 | 1.33467100  | 45.78586900 |
| O | 24.77727200 | 0.40177400  | 38.66851900 | C  | 24.53133800 | 2.18578800  | 46.35772300 |
| C | 25.30028000 | -1.17295300 | 36.92722900 | C  | 25.88762600 | 1.93780400  | 46.11362200 |

|            |             |             |             |   |             |             |             |
|------------|-------------|-------------|-------------|---|-------------|-------------|-------------|
| C          | 26.30158400 | 0.90085900  | 45.27262400 | H | 29.20152400 | 8.23724200  | 39.46349500 |
| O          | 24.09054800 | 3.23414400  | 47.12704800 | H | 28.03368800 | 9.24537900  | 40.35178200 |
| C          | 21.94566500 | -1.12743000 | 41.18582200 | H | 28.21997900 | 7.51744500  | 40.79129700 |
| C          | 21.50409700 | -0.16596800 | 42.27185600 | H | 27.45074100 | 5.53412400  | 39.34880000 |
| C          | 20.84066500 | -0.65314800 | 43.40568800 | H | 21.18992400 | 3.15556700  | 34.74212700 |
| C          | 20.88628300 | 0.06335300  | 44.60358300 | C | 20.71428300 | 2.58969800  | 35.55406300 |
| C          | 21.61521900 | 1.25710300  | 44.66103500 | C | 20.64086800 | 3.44171500  | 36.81711900 |
| C          | 22.02135400 | 1.86492700  | 43.47085800 | O | 19.64453100 | 3.42954700  | 37.54855700 |
| C          | 21.97695500 | 1.15136900  | 42.27787900 | C | 21.49669100 | 1.27612600  | 35.77856400 |
| O          | 22.21603800 | 1.67144000  | 45.85109900 | C | 20.90365700 | 0.37469100  | 36.86644800 |
| Cl         | 20.25687800 | -0.65540300 | 46.07149900 | C | 19.59342800 | -0.28281900 | 36.43503200 |
| C          | 23.57608600 | -3.02842500 | 40.72810100 | H | 21.60741500 | -0.44109300 | 37.08410600 |
| O          | 24.04028000 | -2.87924600 | 39.60743900 | H | 19.69083800 | 2.36063600  | 35.24766200 |
| C          | 23.30850500 | -4.39033400 | 41.27046900 | H | 20.76400300 | 0.91869300  | 37.80785200 |
| O          | 21.03276900 | -2.18752600 | 40.96517500 | H | 22.53707500 | 1.50697800  | 36.03867800 |
| C          | 22.57283600 | -4.63985900 | 42.44173300 | H | 21.50985800 | 0.71942700  | 34.83632800 |
| C          | 22.35950900 | -5.93765400 | 42.89168300 | H | 18.85547600 | -0.29552400 | 38.36813800 |
| C          | 22.88990300 | -7.01586500 | 42.17422000 | O | 19.28451600 | -0.44505300 | 35.26526300 |
| C          | 23.62198800 | -6.78645400 | 41.00125200 | N | 18.82503100 | -0.78278900 | 37.47653600 |
| C          | 23.82004000 | -5.48638000 | 40.55653700 | H | 17.88624600 | -1.06264600 | 37.20580900 |
| O          | 22.66279400 | -8.27148600 | 42.66019300 | N | 21.75798100 | 4.16212200  | 37.09511300 |
| H          | 23.26571400 | -2.05865600 | 42.65707300 | C | 21.99738400 | 4.88952600  | 38.34194600 |
| H          | 24.50467400 | -0.42889700 | 40.48389500 | H | 22.04015900 | 5.96626700  | 38.12895800 |
| H          | 25.02586400 | -1.90478000 | 43.84426700 | C | 23.28574600 | 4.44131100  | 39.04578500 |
| H          | 27.75171100 | -0.83594700 | 43.30549400 | H | 23.43976500 | 5.10681600  | 39.90374200 |
| H          | 23.27363800 | -0.43315300 | 44.61732700 | C | 23.27399800 | 2.98217500  | 39.50982300 |
| H          | 26.62470600 | 2.60788200  | 46.54970700 | H | 21.12494600 | 4.71096600  | 38.97376300 |
| H          | 27.35368600 | 0.78764400  | 45.03207600 | H | 23.12283500 | 2.29778800  | 38.66484400 |
| H          | 22.51877500 | 4.09025600  | 46.80825100 | H | 24.14212000 | 4.61530500  | 38.37657100 |
| H          | 22.14512000 | -0.58093200 | 40.25699500 | H | 22.53923200 | 4.07714300  | 36.45795700 |
| H          | 20.38605700 | -1.63796200 | 43.38107000 | H | 24.21930600 | 2.70988700  | 39.99149200 |
| H          | 22.53706400 | 2.81939400  | 43.52320100 | H | 22.45996500 | 2.80764800  | 40.22427400 |
| H          | 22.42521500 | 1.57607700  | 41.38562500 | C | 16.10647000 | 3.26631100  | 36.90257300 |
| H          | 21.21542100 | 4.30236500  | 45.98168200 | C | 15.96687700 | 3.95851200  | 38.24793000 |
| H          | 20.36775900 | -1.87160600 | 40.31620900 | O | 14.86278700 | 4.16509000  | 38.76005300 |
| H          | 22.12917400 | -3.82064300 | 42.99611800 | C | 15.97857200 | 1.72662900  | 37.02041900 |
| H          | 21.78261500 | -6.13518700 | 43.78937800 | C | 14.68346600 | 1.18779900  | 37.65857400 |
| H          | 24.03165200 | -7.62693800 | 40.44265100 | C | 13.41367900 | 1.59937800  | 36.90209900 |
| H          | 24.37671500 | -5.28980200 | 39.64626500 | C | 14.74960400 | -0.33990800 | 37.80361300 |
| H          | 23.07677300 | -8.91511500 | 42.06393100 | H | 15.67517600 | -0.65168000 | 38.30659700 |
| H          | 24.82012200 | 8.69771800  | 45.02637500 | H | 13.92279200 | -0.69063700 | 38.42966200 |
| H          | 14.08189900 | 10.48564300 | 44.13434100 | H | 14.70502400 | -0.83980400 | 36.82362600 |
| H          | 16.34373600 | 9.45526800  | 44.61153400 | H | 13.39753500 | 1.18539900  | 35.88212400 |
| H          | 31.89994900 | -1.46034800 | 44.75745800 | H | 12.54175700 | 1.23681100  | 37.45402000 |
| H          | 31.86431900 | -0.97183200 | 42.43485200 | H | 13.32066000 | 2.68878900  | 36.83728900 |
| H          | 26.65827200 | -3.13972500 | 44.82752500 | H | 15.31748400 | 3.65906800  | 36.25350900 |
| H          | 20.31310700 | 5.87850000  | 41.34051500 | H | 14.58670900 | 1.60263700  | 38.66631500 |
| H          | 18.11564600 | 6.32739900  | 42.84726100 | H | 16.83904300 | 1.36558600  | 37.60069400 |
| H          | 17.32348700 | 7.66201400  | 47.86669800 | H | 16.09770700 | 1.31051000  | 36.00816400 |
| H          | 18.94303100 | 8.08122600  | 50.02623000 | N | 17.12776500 | 4.34849200  | 38.85764200 |
| H          | 24.05607300 | 7.44210600  | 50.99106800 | C | 17.16646000 | 4.67987200  | 40.28483000 |
| H          | 26.19532900 | 6.58103600  | 49.56388800 | C | 16.38277800 | 5.94271200  | 40.67998400 |
| H          | 27.01273900 | 5.41913500  | 44.46536500 | O | 16.14162900 | 6.16960400  | 41.86631800 |
| H          | 27.81198800 | -0.91464300 | 37.91431200 | C | 18.62396900 | 4.81875300  | 40.74111400 |
| H          | 24.47673400 | 5.53081000  | 37.12808900 | H | 18.00826700 | 4.06465200  | 38.43018500 |
| H          | 17.16492200 | 3.29098800  | 35.74301300 | H | 16.69568600 | 3.87054200  | 40.85617400 |
| H          | 12.11750000 | 6.70114100  | 39.12149600 | H | 19.13624400 | 5.61063700  | 40.18275400 |
| H          | 24.73996900 | 3.96606000  | 47.11308300 | H | 18.65557500 | 5.07299700  | 41.80243300 |
| <b>4Re</b> |             |             |             | H | 19.16152700 | 3.87826800  | 40.58757900 |
| C          | 27.31336200 | 6.10348800  | 38.42345100 | N | 16.00910300 | 6.78973800  | 39.68281100 |
| S          | 26.88531000 | 7.84596400  | 38.78726000 | C | 15.08900200 | 7.88549600  | 39.93162600 |
| C          | 28.22867100 | 8.23936200  | 39.96759900 | C | 13.60508600 | 7.52781500  | 40.17181300 |
| H          | 26.48193300 | 5.67889800  | 37.85241300 | O | 12.82768400 | 8.43558000  | 40.46390400 |

|   |             |             |             |    |             |             |             |
|---|-------------|-------------|-------------|----|-------------|-------------|-------------|
| H | 16.13561900 | 6.46001300  | 38.73654100 | H  | 31.17512700 | 4.95382400  | 39.51527400 |
| H | 15.41210000 | 8.42070300  | 40.82732800 | H  | 29.81237200 | 3.91723900  | 39.08437700 |
| H | 15.13485800 | 8.58581200  | 39.09221300 | N  | 29.37028500 | 1.62109900  | 40.82662200 |
| N | 13.26968100 | 6.22509800  | 40.03394800 | C  | 28.42789500 | 0.51654400  | 40.70700400 |
| C | 11.95411700 | 5.71063000  | 40.38834700 | C  | 27.11572100 | 0.93409000  | 40.01815700 |
| C | 11.98797300 | 4.96317400  | 41.73613300 | O  | 26.38731600 | 1.87243800  | 40.79668500 |
| O | 11.55094600 | 5.49620400  | 42.76600800 | C  | 26.21010600 | -0.27582500 | 39.79799600 |
| H | 13.96637100 | 5.54131900  | 39.74257500 | H  | 28.18241000 | 0.12465800  | 41.70334100 |
| H | 11.27476400 | 6.55741200  | 40.48571100 | H  | 25.27438300 | 0.04435000  | 39.32603700 |
| N | 12.57272900 | 3.74751800  | 41.69030200 | H  | 26.69305600 | -1.01487400 | 39.14768100 |
| C | 12.50015100 | 2.79618700  | 42.80295300 | H  | 28.99183100 | 2.52035400  | 41.14912300 |
| C | 13.07336800 | 3.32139700  | 44.12650100 | H  | 27.37775700 | 1.37266900  | 39.03829800 |
| O | 12.63294800 | 2.93045900  | 45.20193500 | H  | 25.96690400 | -0.75507600 | 40.75311700 |
| C | 13.24875700 | 1.49928700  | 42.41149100 | H  | 26.91718400 | 2.70338200  | 40.88624200 |
| C | 12.89348100 | 0.86760300  | 41.02734500 | C  | 24.42788800 | 8.63817700  | 46.19208600 |
| O | 12.48323200 | 1.64812200  | 40.11177000 | S  | 22.61419300 | 8.52413100  | 46.12622500 |
| O | 13.11055600 | -0.36003100 | 40.92629200 | H  | 24.70968700 | 9.63753800  | 46.53871300 |
| H | 12.62538500 | 3.21294100  | 40.79401600 | H  | 24.85379500 | 7.87784800  | 46.85255900 |
| H | 11.45035900 | 2.56475600  | 43.02223300 | C  | 24.95389600 | 6.25947600  | 43.61603900 |
| H | 13.08476700 | 0.75411200  | 43.19362700 | H  | 25.90395800 | 6.27464100  | 43.08608400 |
| H | 14.32848700 | 1.70061400  | 42.39530700 | C  | 23.36872200 | 4.40814000  | 47.79528500 |
| N | 14.13521800 | 4.17974800  | 44.02077800 | H  | 23.79812100 | 3.77744700  | 48.56777800 |
| C | 14.80294800 | 4.74327300  | 45.17963500 | C  | 19.11945300 | 6.63673700  | 47.15848600 |
| C | 14.29571400 | 6.15380000  | 45.58495600 | H  | 18.20668900 | 6.74134200  | 47.73706700 |
| O | 14.93857600 | 6.83130800  | 46.39979600 | C  | 20.52011700 | 8.00339200  | 42.73563900 |
| C | 16.31785100 | 4.80954500  | 44.98051100 | H  | 20.04596700 | 8.51322400  | 41.90253000 |
| C | 17.06739700 | 3.52491900  | 45.27352500 | C  | 24.89885400 | 5.56563300  | 44.82019700 |
| H | 14.57864200 | 4.07571200  | 46.01872700 | C  | 26.01439400 | 4.81761600  | 45.38599600 |
| H | 14.40801100 | 4.50659700  | 43.10107500 | C  | 25.53495700 | 4.28445800  | 46.54848900 |
| H | 16.70125200 | 5.55085500  | 45.68994100 | C  | 24.16880900 | 4.71000100  | 46.70314400 |
| H | 16.55571000 | 5.18238200  | 43.97809900 | C  | 27.40626600 | 4.69050400  | 44.82892600 |
| O | 16.66822100 | 2.63645800  | 46.00240400 | H  | 28.02296400 | 4.22978800  | 45.60959500 |
| N | 18.32167800 | 3.44113900  | 44.64123300 | H  | 27.81863400 | 5.68828100  | 44.63603300 |
| H | 19.00020100 | 2.87774100  | 45.16017500 | C  | 27.55653400 | 3.88723900  | 43.51237300 |
| H | 18.73685200 | 4.32992700  | 44.37044500 | H  | 28.39737300 | 3.18784000  | 43.60337500 |
| N | 13.13588900 | 6.55131300  | 45.02465300 | H  | 26.68084600 | 3.25747300  | 43.31459300 |
| C | 12.53823900 | 7.85340100  | 45.27833800 | C  | 27.82457600 | 4.74520000  | 42.24826400 |
| H | 11.49961400 | 7.70334000  | 45.60285200 | O  | 28.00173900 | 4.08191400  | 41.16607000 |
| C | 12.56333100 | 8.76590900  | 44.04206100 | O  | 27.85346800 | 5.98838100  | 42.35318700 |
| C | 13.97392600 | 9.16498400  | 43.59824600 | C  | 22.06957800 | 4.86357600  | 47.99263800 |
| H | 13.09224200 | 8.29978900  | 46.10918700 | C  | 21.27873300 | 4.59372300  | 49.16699700 |
| H | 12.05419200 | 8.25879800  | 43.21436500 | C  | 20.09117100 | 5.23897600  | 48.99603200 |
| H | 14.57539800 | 8.27744100  | 43.37131500 | C  | 20.15548800 | 5.89128300  | 47.71244100 |
| H | 13.92732100 | 9.77433900  | 42.68945200 | C  | 19.13382200 | 7.20959600  | 45.89489000 |
| H | 12.67569400 | 5.95899900  | 44.33401100 | C  | 18.00947900 | 7.89221000  | 45.29975300 |
| N | 35.91283200 | 1.43944200  | 41.55401900 | C  | 18.39104700 | 8.23650800  | 44.03912800 |
| C | 35.06383300 | 2.02205900  | 40.51931500 | C  | 19.75229400 | 7.78945700  | 43.87359500 |
| C | 33.61248000 | 2.26928400  | 40.97587800 | C  | 21.85821100 | 7.66995600  | 42.60406000 |
| O | 33.27680100 | 2.03715900  | 42.13712300 | C  | 22.67523300 | 7.98804000  | 41.46030400 |
| H | 35.73303400 | 1.96614400  | 42.41045300 | C  | 23.93127900 | 7.52991700  | 41.72369200 |
| H | 35.50283500 | 2.97373400  | 40.18606100 | C  | 23.87819300 | 6.90786500  | 43.02482600 |
| N | 32.76047900 | 2.78709300  | 40.05201100 | N  | 23.79691900 | 5.49183600  | 45.63612700 |
| C | 31.33965000 | 2.96305100  | 40.34814800 | N  | 21.36874300 | 5.65359500  | 47.12145000 |
| C | 30.59399600 | 1.60798200  | 40.24922700 | N  | 20.18907800 | 7.16162000  | 45.01336400 |
| O | 31.09306200 | 0.64757100  | 39.65986800 | N  | 22.61219800 | 7.01511300  | 43.55425900 |
| C | 30.89313200 | 3.93174200  | 39.23608700 | Fe | 21.94551800 | 6.19797600  | 45.26731600 |
| C | 31.71193100 | 3.44894200  | 38.02632700 | O  | 21.43321300 | 4.79225700  | 44.59240000 |
| C | 33.06579600 | 3.02462800  | 38.63531100 | C  | 21.81565000 | -2.96263500 | 41.01094600 |
| H | 31.22867300 | 2.57766900  | 37.57407700 | N  | 23.06141900 | -2.32506100 | 41.41957300 |
| H | 31.21639100 | 3.38327200  | 41.34821700 | C  | 23.69047500 | -2.32649600 | 42.63531300 |
| H | 33.82035100 | 3.81806900  | 38.53373200 | O  | 24.89754900 | -2.10783300 | 42.71786400 |
| H | 33.45709300 | 2.12126800  | 38.15355300 | C  | 22.87402000 | -2.48554100 | 43.93045500 |
| H | 31.83110900 | 4.21371200  | 37.25190000 | N  | 23.75332500 | -3.14360200 | 44.89435800 |

|    |             |             |             |                                  |             |             |             |
|----|-------------|-------------|-------------|----------------------------------|-------------|-------------|-------------|
| C  | 23.36549000 | -4.07499200 | 45.80084800 | H                                | 17.07627100 | 3.50776100  | 36.45273900 |
| O  | 24.09419600 | -4.61841900 | 46.61641900 | H                                | 11.60850200 | 5.04018300  | 39.59255800 |
| C  | 22.34958800 | -1.13157100 | 44.40971600 | <sup>a</sup> TS1 <sub>HA,A</sub> |             |             |             |
| C  | 23.09183100 | 0.04903800  | 44.26739300 | C                                | 25.03988600 | 5.78469500  | 35.73614200 |
| C  | 22.59938500 | 1.26628300  | 44.73607500 | S                                | 24.21101600 | 4.38379500  | 34.89363300 |
| C  | 21.34966500 | 1.31685500  | 45.36822400 | C                                | 25.30335600 | 3.02365700  | 35.45219800 |
| C  | 20.60575800 | 0.14028500  | 45.53197700 | H                                | 24.39906400 | 6.66325900  | 35.61572700 |
| C  | 21.10457800 | -1.06430400 | 45.04912900 | H                                | 25.41992600 | 3.04321100  | 36.54193200 |
| O  | 20.80793700 | 2.47098000  | 45.84357800 | H                                | 24.83697500 | 2.08384000  | 35.14318100 |
| C  | 21.03058600 | -2.01650400 | 40.04129500 | H                                | 26.28329200 | 3.10415300  | 34.97055300 |
| C  | 20.14207600 | -1.00067700 | 40.74690700 | H                                | 26.00593500 | 5.98948300  | 35.26304300 |
| C  | 18.75688100 | -1.21339700 | 40.80710000 | H                                | 21.09526800 | 2.02158100  | 34.77491800 |
| C  | 17.90495100 | -0.27846300 | 41.39090100 | C                                | 20.69100900 | 1.70966500  | 35.74615500 |
| C  | 18.42119700 | 0.90080200  | 41.96576900 | C                                | 20.08733300 | 2.90376400  | 36.47005300 |
| C  | 19.81299300 | 1.09497600  | 41.93250900 | O                                | 19.07238000 | 2.77344900  | 37.17115600 |
| C  | 20.65832700 | 0.16730300  | 41.32394300 | C                                | 21.81190100 | 1.02209800  | 36.55595600 |
| O  | 17.55504800 | 1.79632200  | 42.47725600 | C                                | 21.41602300 | 0.57041900  | 37.96372900 |
| Cl | 16.18201700 | -0.55130600 | 41.37959000 | C                                | 20.39091500 | -0.55598900 | 37.97745100 |
| C  | 22.18122300 | -4.27564100 | 40.26426400 | H                                | 22.32490800 | 0.22927800  | 38.47449400 |
| O  | 23.20877300 | -4.28812100 | 39.59881500 | H                                | 19.88232700 | 0.99709900  | 35.56953200 |
| C  | 21.33946800 | -5.48960100 | 40.41798300 | H                                | 21.03234500 | 1.41022500  | 38.55526400 |
| O  | 20.29272300 | -2.87119800 | 39.17933600 | H                                | 22.67093500 | 1.69580700  | 36.64734400 |
| C  | 20.06259600 | -5.48358300 | 41.00633600 | H                                | 22.14496400 | 0.14724500  | 35.98718600 |
| C  | 19.32754800 | -6.65591900 | 41.13264800 | H                                | 19.88945800 | -0.14657200 | 39.94818800 |
| C  | 19.86625500 | -7.86426200 | 40.67452900 | O                                | 20.06778600 | -1.19723100 | 36.99020300 |
| C  | 21.13606000 | -7.88791000 | 40.08069000 | N                                | 19.87582300 | -0.86866600 | 39.23509200 |
| C  | 21.85755200 | -6.70886000 | 39.95182900 | H                                | 19.01878800 | -1.41114100 | 39.20162200 |
| O  | 19.11189000 | -8.99037400 | 40.82982600 | N                                | 20.74037200 | 4.08079200  | 36.31667500 |
| H  | 21.20397600 | -3.16562600 | 41.88873800 | C                                | 20.36165500 | 5.31793300  | 36.99049900 |
| H  | 23.74158600 | -2.29810700 | 40.66251000 | H                                | 19.95110500 | 6.02204500  | 36.25172700 |
| H  | 22.01661500 | -3.14846300 | 43.77815300 | C                                | 21.54142000 | 5.96646700  | 37.72658100 |
| H  | 24.73061800 | -2.87235700 | 44.86025300 | H                                | 21.20081600 | 6.93534400  | 38.11721000 |
| H  | 24.06197900 | 0.02519900  | 43.77939900 | C                                | 22.11775000 | 5.10801500  | 38.85450100 |
| H  | 23.17686900 | 2.17789600  | 44.60816200 | H                                | 19.55584500 | 5.06577500  | 37.68424500 |
| H  | 19.63350400 | 0.19530800  | 46.01276900 | H                                | 22.38021500 | 4.10994500  | 38.49039700 |
| H  | 20.50754900 | -1.96676300 | 45.16653300 | H                                | 22.33287600 | 6.19198300  | 37.00082000 |
| H  | 21.23477200 | 3.27640700  | 45.45070000 | H                                | 21.62361500 | 4.08240500  | 35.81036100 |
| H  | 21.80503900 | -1.47857300 | 39.47069100 | H                                | 23.04144400 | 5.54375800  | 39.24432300 |
| H  | 18.32939700 | -2.11203200 | 40.37564400 | H                                | 21.39712000 | 4.98896700  | 39.67241600 |
| H  | 20.23006900 | 1.99332100  | 42.37941200 | C                                | 15.49109000 | 2.97382200  | 36.91757500 |
| H  | 21.72692600 | 0.36040800  | 41.30369100 | C                                | 15.62151500 | 3.66615100  | 38.26342700 |
| H  | 17.97809500 | 2.39811100  | 43.14529800 | O                                | 14.66008100 | 4.20585900  | 38.82670400 |
| H  | 19.82064500 | -2.31799300 | 38.52338200 | C                                | 14.76527400 | 1.60863100  | 37.03545300 |
| H  | 19.61715500 | -4.55378000 | 41.34201900 | C                                | 13.30420300 | 1.65576100  | 37.52552500 |
| H  | 18.33714000 | -6.65480300 | 41.57595100 | C                                | 12.36696000 | 2.38150400  | 36.55024700 |
| H  | 21.55181800 | -8.82914000 | 39.72367000 | C                                | 12.78361700 | 0.23932700  | 37.81541800 |
| H  | 22.83994500 | -6.70647200 | 39.49109000 | H                                | 13.44718300 | -0.29704100 | 38.50779700 |
| H  | 19.60087900 | -9.74652100 | 40.46889100 | H                                | 11.79006800 | 0.28761700  | 38.27745200 |
| H  | 24.84417700 | 8.49083200  | 45.18803100 | H                                | 12.71254800 | -0.35874700 | 36.89433300 |
| H  | 11.97542700 | 9.66694400  | 44.27279200 | H                                | 12.28644300 | 1.84089600  | 35.59469000 |
| H  | 14.49465800 | 9.73401600  | 44.37978100 | H                                | 11.37323800 | 2.46991200  | 37.00169100 |
| H  | 35.53073900 | 0.51847800  | 41.77263400 | H                                | 12.71194300 | 3.40075800  | 36.33826800 |
| H  | 35.06910200 | 1.36365500  | 39.64177800 | H                                | 14.92361900 | 3.63997900  | 36.25856000 |
| H  | 22.28316200 | -4.30949200 | 45.71968500 | H                                | 13.27199000 | 2.21870800  | 38.46452400 |
| H  | 24.81727900 | 7.58107600  | 41.10102000 | H                                | 15.35282300 | 0.96684000  | 37.70810800 |
| H  | 22.32058200 | 8.50874700  | 40.57945600 | H                                | 14.80505500 | 1.12713100  | 36.04662200 |
| H  | 17.80625400 | 8.72982800  | 43.27399900 | N                                | 16.85674400 | 3.64985300  | 38.84290300 |
| H  | 17.04245400 | 8.01335900  | 45.77316300 | C                                | 17.01996800 | 4.01718400  | 40.24723700 |
| H  | 19.23470200 | 5.26877800  | 49.65726200 | C                                | 16.75477100 | 5.50596400  | 40.53532700 |
| H  | 21.60371400 | 3.98525800  | 50.00135000 | O                                | 16.52123700 | 5.88660000  | 41.68297900 |
| H  | 26.06781200 | 3.66230000  | 47.25791200 | C                                | 18.40639800 | 3.60090900  | 40.75281900 |
| H  | 28.93053200 | -0.27208900 | 40.14045500 | H                                | 17.64700600 | 3.24488900  | 38.33934900 |
| H  | 28.22258000 | 6.04611700  | 37.81455100 | H                                | 16.25270200 | 3.49711600  | 40.83309800 |

|   |             |             |             |    |             |             |             |
|---|-------------|-------------|-------------|----|-------------|-------------|-------------|
| H | 19.20055800 | 4.07874800  | 40.17067800 | C  | 31.51541900 | 2.32143000  | 38.76602900 |
| H | 18.53223100 | 3.87803200  | 41.80144000 | C  | 31.97313100 | 1.84514000  | 40.16390300 |
| H | 18.52719700 | 2.51622800  | 40.66786400 | H  | 31.42340200 | 1.45925900  | 38.09978300 |
| N | 16.81336100 | 6.35329700  | 39.47215400 | H  | 28.77531700 | 2.51980400  | 40.71814100 |
| C | 16.41236400 | 7.74425500  | 39.57303600 | H  | 32.68459400 | 2.54948600  | 40.61604100 |
| C | 14.90199900 | 8.04776500  | 39.66576100 | H  | 32.45118400 | 0.86055200  | 40.11346800 |
| O | 14.55247300 | 9.21860800  | 39.80296500 | H  | 32.22534500 | 3.02481400  | 38.31864900 |
| H | 16.89737000 | 5.92761000  | 38.55926300 | H  | 30.21599800 | 3.96846400  | 39.38193100 |
| H | 16.85653100 | 8.17967600  | 40.47076600 | H  | 29.49210400 | 2.95331700  | 38.12123800 |
| H | 16.80827400 | 8.29085100  | 38.71214100 | N  | 27.79367900 | 0.77038900  | 38.99495800 |
| N | 14.05998700 | 6.98979300  | 39.58359200 | C  | 27.13327800 | -0.44686200 | 38.54048800 |
| C | 12.62945800 | 7.12078000  | 39.82384900 | C  | 25.75897200 | -0.15865600 | 37.92340500 |
| C | 12.23052100 | 6.44325600  | 41.14735300 | O  | 24.85296400 | 0.40700700  | 38.88014900 |
| O | 12.04067300 | 7.10089300  | 42.17784800 | C  | 25.13105000 | -1.44071700 | 37.38346700 |
| H | 14.41997300 | 6.04637100  | 39.44431400 | H  | 27.01474500 | -1.15047900 | 39.37469300 |
| H | 12.40183200 | 8.18435500  | 39.89702400 | H  | 24.15912300 | -1.22335100 | 36.92824000 |
| N | 12.17687900 | 5.09130400  | 41.08664200 | H  | 25.77301900 | -1.89823700 | 36.62139300 |
| C | 11.60918300 | 4.28705200  | 42.16815000 | H  | 27.20053200 | 1.58189000  | 39.18280500 |
| C | 12.35780200 | 4.38802200  | 43.50762400 | H  | 25.89046500 | 0.56208000  | 37.10329900 |
| O | 11.76977500 | 4.13719100  | 44.55539100 | H  | 24.98255000 | -2.16101700 | 38.19420100 |
| C | 11.56262900 | 2.80376800  | 41.73580800 | H  | 25.09974200 | 1.36788200  | 38.99418800 |
| C | 10.85269100 | 2.51844700  | 40.37991000 | C  | 23.48316100 | 8.60080300  | 45.14881200 |
| O | 11.00542600 | 3.34878200  | 39.43689500 | S  | 22.50399800 | 7.88876400  | 46.51302700 |
| O | 10.21813200 | 1.43047000  | 40.32099700 | H  | 23.58113600 | 9.67365100  | 45.34189500 |
| H | 12.02204900 | 4.62661600  | 40.17404800 | H  | 24.47723600 | 8.15305200  | 45.08413200 |
| H | 10.59075100 | 4.63138200  | 42.39264400 | C  | 22.92451300 | 5.96106200  | 42.76084100 |
| H | 11.08144300 | 2.22532900  | 42.52911900 | H  | 23.15729400 | 6.04486300  | 41.70569500 |
| H | 12.59293900 | 2.43038000  | 41.63696600 | C  | 25.37919400 | 4.82103800  | 46.75797500 |
| N | 13.68753500 | 4.70048100  | 43.44459700 | H  | 26.40842900 | 4.55733600  | 46.97510800 |
| C | 14.50601900 | 4.84778900  | 44.63937000 | C  | 21.32111900 | 5.19716400  | 49.36234100 |
| C | 14.80421200 | 6.32266600  | 44.98355500 | H  | 21.05939600 | 5.04043500  | 50.40382400 |
| O | 15.77592200 | 6.62133700  | 45.68935700 | C  | 18.90987600 | 6.56439000  | 45.40076300 |
| C | 15.79177100 | 4.00990300  | 44.57112000 | H  | 17.87457400 | 6.81966100  | 45.20004500 |
| C | 16.31496600 | 3.62887300  | 45.95953900 | C  | 23.94188400 | 5.55945800  | 43.61228500 |
| H | 13.90415600 | 4.45942600  | 45.46896500 | C  | 25.29831600 | 5.24829700  | 43.18617400 |
| H | 14.08933400 | 4.94721300  | 42.54751800 | C  | 25.98254000 | 4.98006100  | 44.33724100 |
| H | 16.56113800 | 4.51050000  | 43.97618600 | C  | 25.06070000 | 5.09525000  | 45.43553100 |
| H | 15.54671800 | 3.06979600  | 44.05856300 | C  | 25.78712700 | 5.20059500  | 41.76737200 |
| O | 15.58729200 | 3.59277800  | 46.94860000 | H  | 26.87535300 | 5.33374500  | 41.76282300 |
| N | 17.62756700 | 3.28044100  | 46.00550400 | H  | 25.37934700 | 6.02851800  | 41.17879900 |
| H | 17.97557800 | 2.92316700  | 46.88397800 | C  | 25.43692100 | 3.89328800  | 41.02246600 |
| H | 18.25096400 | 3.20733100  | 45.20536000 | H  | 26.02781100 | 3.04938400  | 41.39194300 |
| N | 13.91325800 | 7.22943100  | 44.52406000 | H  | 24.38684900 | 3.63250400  | 41.21586800 |
| C | 13.98751300 | 8.64931500  | 44.83741200 | C  | 25.58749800 | 4.01105700  | 39.48463500 |
| H | 13.02477500 | 8.95699500  | 45.26874900 | O  | 25.77353800 | 2.91256300  | 38.84928600 |
| C | 14.30435300 | 9.52412100  | 43.61512400 | O  | 25.48336400 | 5.14135600  | 38.96930500 |
| C | 15.72086800 | 9.32527000  | 43.06925500 | C  | 24.48030400 | 4.80333400  | 47.81550600 |
| H | 14.75475600 | 8.76205500  | 45.60824500 | C  | 24.82969500 | 4.47616400  | 49.17314300 |
| H | 13.57394500 | 9.30830400  | 42.82601100 | C  | 23.68370300 | 4.56468600  | 49.90425200 |
| H | 15.88567400 | 8.27666100  | 42.79903100 | C  | 22.64019600 | 4.95314600  | 48.99207300 |
| H | 15.87165900 | 9.92986100  | 42.16850000 | C  | 20.31569700 | 5.62690300  | 48.51310700 |
| H | 13.18938900 | 6.93768600  | 43.87051400 | C  | 18.94584600 | 5.85109800  | 48.90640000 |
| N | 31.72030600 | 0.76769500  | 44.34471400 | C  | 18.26719800 | 6.23143900  | 47.79035700 |
| C | 31.89460200 | 0.83165500  | 42.90184600 | C  | 19.22883400 | 6.24896100  | 46.71603000 |
| C | 30.61835600 | 1.34329600  | 42.23248400 | C  | 19.80502200 | 6.54201800  | 44.34586800 |
| O | 29.53803100 | 1.31694600  | 42.81811700 | C  | 19.45898500 | 6.86941300  | 42.98773200 |
| H | 30.82107300 | 0.32893300  | 44.55769600 | C  | 20.58937300 | 6.70855700  | 42.24675800 |
| H | 32.73857500 | 1.49200600  | 42.65747300 | C  | 21.62528400 | 6.27283900  | 43.14828100 |
| N | 30.73563300 | 1.79807200  | 40.95213200 | N  | 23.81897500 | 5.45182400  | 44.97612800 |
| C | 29.55488900 | 2.04092500  | 40.12388100 | N  | 23.14231100 | 5.08199000  | 47.72742100 |
| C | 29.03120000 | 0.70751000  | 39.53368000 | N  | 20.46676200 | 5.88556900  | 47.17143300 |
| O | 29.74498100 | -0.29666300 | 39.49950700 | N  | 21.13398500 | 6.19081500  | 44.42453600 |
| C | 30.12602400 | 2.94062700  | 39.01132900 | Fe | 22.11000200 | 5.56850000  | 46.05458600 |

|    |             |             |             |                         |             |             |             |
|----|-------------|-------------|-------------|-------------------------|-------------|-------------|-------------|
| O  | 21.69203700 | 3.91965700  | 45.77771800 | H                       | 17.21523200 | 6.43971800  | 47.65111400 |
| C  | 23.88495100 | -1.69413700 | 41.95162500 | H                       | 18.56555600 | 5.70623000  | 49.90940400 |
| N  | 24.91928300 | -0.74478800 | 41.59212800 | H                       | 23.54094100 | 4.38606700  | 50.96195600 |
| C  | 25.99852200 | -0.33637300 | 42.30873000 | H                       | 25.82365200 | 4.20507200  | 49.50312700 |
| O  | 26.77203400 | 0.50862600  | 41.86344900 | H                       | 27.02153900 | 4.69269300  | 44.43556900 |
| C  | 26.21482700 | -0.89114100 | 43.73559900 | H                       | 27.77412400 | -0.93686800 | 37.79759100 |
| N  | 27.61712100 | -0.64331400 | 44.07049000 | H                       | 25.18033800 | 5.56389100  | 36.80113600 |
| C  | 28.28988100 | -1.34103100 | 45.00380700 | H                       | 16.48266500 | 2.81900500  | 36.47749300 |
| O  | 29.46326400 | -1.17914300 | 45.33324300 | H                       | 12.07344300 | 6.67648600  | 38.98792400 |
| C  | 25.21486200 | -0.23400800 | 44.68311900 |                         |             |             |             |
| C  | 24.93459600 | 1.13177600  | 44.56053300 |                         |             |             |             |
| C  | 23.97565200 | 1.74107500  | 45.35333000 |                         |             |             |             |
| C  | 23.27084200 | 0.99908300  | 46.31432800 |                         |             |             |             |
| C  | 23.56816100 | -0.36203000 | 46.47505500 |                         |             |             |             |
| C  | 24.52445500 | -0.96629100 | 45.65818500 |                         |             |             |             |
| O  | 22.31226800 | 1.55932800  | 47.08828600 |                         |             |             |             |
| C  | 22.55459900 | -1.22734500 | 41.27377900 |                         |             |             |             |
| C  | 21.87162800 | -0.08836800 | 42.01625800 |                         |             |             |             |
| C  | 20.86410500 | -0.36631600 | 42.95006500 |                         |             |             |             |
| C  | 20.26379600 | 0.65512100  | 43.67696000 |                         |             |             |             |
| C  | 20.63706800 | 2.01918500  | 43.52109700 |                         |             |             |             |
| C  | 21.63003400 | 2.27112500  | 42.53966400 |                         |             |             |             |
| C  | 22.23184800 | 1.25301200  | 41.81165100 |                         |             |             |             |
| O  | 20.08925900 | 2.99412500  | 44.22221400 |                         |             |             |             |
| Cl | 19.00682800 | 0.24116600  | 44.83272100 |                         |             |             |             |
| C  | 24.24400100 | -3.12159900 | 41.46562600 |                         |             |             |             |
| O  | 24.87314000 | -3.26555700 | 40.42682700 |                         |             |             |             |
| C  | 23.87656500 | -4.30393700 | 42.30012400 |                         |             |             |             |
| O  | 21.71749600 | -2.37194800 | 41.15861900 |                         |             |             |             |
| C  | 23.02246500 | -4.24371800 | 43.41503900 |                         |             |             |             |
| C  | 22.72571700 | -5.38464000 | 44.15253700 |                         |             |             |             |
| C  | 23.28758100 | -6.61263000 | 43.78699300 |                         |             |             |             |
| C  | 24.13918100 | -6.69209500 | 42.67701000 |                         |             |             |             |
| C  | 24.42236800 | -5.54739600 | 41.94361600 |                         |             |             |             |
| O  | 22.97353900 | -7.70495200 | 44.54629300 |                         |             |             |             |
| H  | 23.75389500 | -1.68146500 | 43.03436400 |                         |             |             |             |
| H  | 24.90471800 | -0.36774500 | 40.63611500 |                         |             |             |             |
| H  | 26.04388200 | -1.97500100 | 43.74166400 |                         |             |             |             |
| H  | 28.10409900 | 0.08788300  | 43.54335500 |                         |             |             |             |
| H  | 25.45865000 | 1.72243300  | 43.81598700 |                         |             |             |             |
| H  | 23.73159500 | 2.78431500  | 45.21210300 |                         |             |             |             |
| H  | 23.02268500 | -0.93450600 | 47.21913700 |                         |             |             |             |
| H  | 24.72358900 | -2.03081100 | 45.77325500 |                         |             |             |             |
| H  | 22.09804000 | 2.45799000  | 46.73424300 |                         |             |             |             |
| H  | 22.84847700 | -0.88434300 | 40.27394700 |                         |             |             |             |
| H  | 20.54776900 | -1.39204400 | 43.10444800 |                         |             |             |             |
| H  | 21.91343100 | 3.30561500  | 42.37848200 |                         |             |             |             |
| H  | 22.99631600 | 1.49876800  | 41.08019000 |                         |             |             |             |
| H  | 20.91473100 | 3.56433600  | 44.99269200 |                         |             |             |             |
| H  | 21.03877500 | -2.13834700 | 40.49449900 |                         |             |             |             |
| H  | 22.56146000 | -3.30689400 | 43.70492300 |                         |             |             |             |
| H  | 22.06034400 | -5.34344000 | 45.00877700 |                         |             |             |             |
| H  | 24.57509900 | -7.64943300 | 42.39367700 |                         |             |             |             |
| H  | 25.07467400 | -5.58894800 | 41.07763000 |                         |             |             |             |
| H  | 23.42686400 | -8.47877700 | 44.17667100 |                         |             |             |             |
| H  | 22.97220500 | 8.46824100  | 44.19111200 |                         |             |             |             |
| H  | 14.15863400 | 10.57548600 | 43.90431200 |                         |             |             |             |
| H  | 16.47798000 | 9.60587900  | 43.81263600 |                         |             |             |             |
| H  | 32.43104200 | 0.15457600  | 44.73852700 |                         |             |             |             |
| H  | 32.11637300 | -0.13748700 | 42.40918400 |                         |             |             |             |
| H  | 27.66875000 | -2.12818600 | 45.47908600 |                         |             |             |             |
| H  | 20.72843000 | 6.85747300  | 41.18460700 |                         |             |             |             |
| H  | 18.46470900 | 7.14521700  | 42.66485700 |                         |             |             |             |
|    |             |             |             | <b><sup>41</sup>M1A</b> |             |             |             |
|    |             |             |             | C                       | 24.90542300 | 5.86338600  | 35.75899900 |
|    |             |             |             | S                       | 24.13987600 | 4.44065800  | 34.89385800 |
|    |             |             |             | C                       | 25.28862400 | 3.12226200  | 35.44126600 |
|    |             |             |             | H                       | 24.22356400 | 6.71340900  | 35.65997300 |
|    |             |             |             | H                       | 25.38219500 | 3.11433300  | 36.53364800 |
|    |             |             |             | H                       | 24.87927100 | 2.16897800  | 35.09450800 |
|    |             |             |             | H                       | 26.27297600 | 3.26775900  | 34.98437500 |
|    |             |             |             | H                       | 25.85906200 | 6.12243400  | 35.28695500 |
|    |             |             |             | H                       | 21.10437600 | 2.08013600  | 34.66951600 |
|    |             |             |             | C                       | 20.74440600 | 1.71135400  | 35.63795200 |
|    |             |             |             | C                       | 20.05830500 | 2.83484500  | 36.40340800 |
|    |             |             |             | O                       | 19.05762400 | 2.61119700  | 37.10202500 |
|    |             |             |             | C                       | 21.93297100 | 1.11004800  | 36.41845500 |
|    |             |             |             | C                       | 21.56846600 | 0.53248600  | 37.78933700 |
|    |             |             |             | C                       | 20.74205100 | -0.74055100 | 37.69058300 |
|    |             |             |             | H                       | 22.50526100 | 0.29040900  | 38.31041300 |
|    |             |             |             | H                       | 19.99410600 | 0.93903600  | 35.44862600 |
|    |             |             |             | H                       | 21.04770400 | 1.27387500  | 38.40662600 |
|    |             |             |             | H                       | 22.70713800 | 1.87203800  | 36.55992700 |
|    |             |             |             | H                       | 22.36955700 | 0.31113100  | 35.81033900 |
|    |             |             |             | H                       | 19.66497200 | -0.28522400 | 39.39099300 |
|    |             |             |             | O                       | 20.75700600 | -1.48810500 | 36.72808000 |
|    |             |             |             | N                       | 20.00530500 | -1.06655100 | 38.83896400 |
|    |             |             |             | H                       | 19.29152100 | -1.76662000 | 38.65649700 |
|    |             |             |             | N                       | 20.63928600 | 4.05320700  | 36.28664100 |
|    |             |             |             | C                       | 20.22614400 | 5.23800100  | 37.03136300 |
|    |             |             |             | H                       | 19.80206900 | 5.97442200  | 36.33356600 |
|    |             |             |             | C                       | 21.38963100 | 5.86701600  | 37.81010000 |
|    |             |             |             | H                       | 21.02309700 | 6.79570000  | 38.26882300 |
|    |             |             |             | C                       | 21.99458000 | 4.94831500  | 38.87389500 |
|    |             |             |             | H                       | 19.42384800 | 4.92778600  | 37.70532100 |
|    |             |             |             | H                       | 22.29552800 | 3.98987300  | 38.43850900 |
|    |             |             |             | H                       | 22.17347800 | 6.16497200  | 37.10161000 |
|    |             |             |             | H                       | 21.52121300 | 4.11349100  | 35.78129900 |
|    |             |             |             | H                       | 22.90139900 | 5.38873800  | 39.29754900 |
|    |             |             |             | H                       | 21.27948000 | 4.74396100  | 39.68042800 |
|    |             |             |             | C                       | 15.54477600 | 3.17784900  | 36.56159400 |
|    |             |             |             | C                       | 15.60819200 | 3.84789600  | 37.92218100 |
|    |             |             |             | O                       | 14.64217900 | 4.45004500  | 38.40102500 |
|    |             |             |             | C                       | 14.84684000 | 1.79385700  | 36.64460500 |
|    |             |             |             | C                       | 13.41146800 | 1.78899000  | 37.20749300 |
|    |             |             |             | C                       | 12.42204800 | 2.58762900  | 36.34842900 |
|    |             |             |             | C                       | 12.91022000 | 0.35061800  | 37.40980700 |
|    |             |             |             | H                       | 13.62321500 | -0.24113300 | 38.00021100 |
|    |             |             |             | H                       | 11.95932700 | 0.36072000  | 37.95322400 |
|    |             |             |             | H                       | 12.76979100 | -0.16381700 | 36.44713100 |
|    |             |             |             | H                       | 12.29245600 | 2.13108500  | 35.35514000 |
|    |             |             |             | H                       | 11.45781600 | 2.62615500  | 36.86289600 |
|    |             |             |             | H                       | 12.75174100 | 3.62378500  | 36.21283500 |
|    |             |             |             | H                       | 14.98457800 | 3.84071300  | 35.89505700 |
|    |             |             |             | H                       | 13.41839400 | 2.27190200  | 38.18948100 |
|    |             |             |             | H                       | 15.47637900 | 1.13243900  | 37.25718200 |
|    |             |             |             | H                       | 14.84939300 | 1.36320500  | 35.63188200 |

|   |             |            |             |   |             |             |             |
|---|-------------|------------|-------------|---|-------------|-------------|-------------|
| N | 16.78126500 | 3.72250500 | 38.61568800 | H | 30.81062900 | 0.08878900  | 44.55454800 |
| C | 16.82382500 | 3.95754900 | 40.05784000 | H | 32.72376500 | 1.32803300  | 42.69862000 |
| C | 16.64494600 | 5.42710200 | 40.48288300 | N | 30.70857100 | 1.68546600  | 41.01237900 |
| O | 16.43081900 | 5.69995200 | 41.66508300 | C | 29.51820200 | 1.95306800  | 40.20525200 |
| C | 18.11470000 | 3.38447400 | 40.65401800 | C | 28.98752500 | 0.63598300  | 39.58527300 |
| H | 17.57259000 | 3.25585600 | 38.17043000 | O | 29.69501800 | -0.37184900 | 39.52886500 |
| H | 15.96388000 | 3.45304800 | 40.51558000 | C | 30.07535000 | 2.88624600  | 39.11307200 |
| H | 18.99925500 | 3.83484000 | 40.19079200 | C | 31.46398000 | 2.27935300  | 38.83772900 |
| H | 18.14923700 | 3.58290800 | 41.72735500 | C | 31.94088500 | 1.78225900  | 40.22076800 |
| H | 18.15587000 | 2.30157700 | 40.49493000 | H | 31.36604400 | 1.42732900  | 38.15882700 |
| N | 16.74069300 | 6.36984600 | 39.50794300 | H | 28.74413600 | 2.41338400  | 40.82211100 |
| C | 16.35235400 | 7.75032900 | 39.74143400 | H | 32.63623600 | 2.49439100  | 40.68638000 |
| C | 14.84386500 | 8.04672000 | 39.89325200 | H | 32.44473100 | 0.81204100  | 40.14550700 |
| O | 14.50396200 | 9.19276100 | 40.18165600 | H | 32.16499300 | 2.99282800  | 38.39215000 |
| H | 16.78349700 | 6.02862000 | 38.55800300 | H | 30.16566100 | 3.90362100  | 39.51221800 |
| H | 16.81605600 | 8.09951200 | 40.66637500 | H | 29.43251600 | 2.92234300  | 38.22972500 |
| H | 16.73865200 | 8.36854100 | 38.92575400 | N | 27.74884700 | 0.71408700  | 39.05016700 |
| N | 13.99775700 | 7.00939700 | 39.69428500 | C | 27.09033200 | -0.48987800 | 38.55948800 |
| C | 12.57600900 | 7.09546800 | 39.99950700 | C | 25.71758100 | -0.18830300 | 37.94644300 |
| C | 12.23305800 | 6.31556000 | 41.28385900 | O | 24.81484600 | 0.36275900  | 38.91801100 |
| O | 12.00947500 | 6.90605400 | 42.34880800 | C | 25.09064700 | -1.46006000 | 37.38088500 |
| H | 14.35237600 | 6.09936000 | 39.40563700 | H | 26.96956000 | -1.21682800 | 39.37387200 |
| H | 12.33124700 | 8.14528500 | 40.15925000 | H | 24.11938700 | -1.24243800 | 36.92439000 |
| N | 12.25875900 | 4.97095800 | 41.14267900 | H | 25.73734800 | -1.90265300 | 36.61400200 |
| C | 11.71857000 | 4.07318900 | 42.16494400 | H | 27.16039400 | 1.52898000  | 39.23925300 |
| C | 12.40582700 | 4.16314800 | 43.53345400 | H | 25.84748900 | 0.55142400  | 37.14334500 |
| O | 11.79329000 | 3.85203400 | 44.55017000 | H | 24.94154600 | -2.19538000 | 38.17786600 |
| C | 11.79954600 | 2.61479900 | 41.65447700 | H | 25.05311600 | 1.32923000  | 39.02739700 |
| C | 11.19856400 | 2.33954000 | 40.23619900 | C | 23.51625400 | 8.82008300  | 44.82479000 |
| O | 11.30718800 | 3.26837400 | 39.37460300 | S | 22.42101800 | 8.27327500  | 46.17090100 |
| O | 10.72320800 | 1.19862800 | 40.06388400 | H | 23.55153800 | 9.91372300  | 44.82372000 |
| H | 12.11515800 | 4.53634200 | 40.20319900 | H | 24.52219400 | 8.40853200  | 44.94372800 |
| H | 10.67005900 | 4.32844500 | 42.36442700 | C | 22.92312100 | 5.94126600  | 42.77377100 |
| H | 11.31290300 | 1.96345700 | 42.38375300 | H | 23.11643400 | 5.93913700  | 41.70604400 |
| H | 12.85765200 | 2.31690100 | 41.61273600 | C | 25.61713800 | 5.28208100  | 46.73831200 |
| N | 13.72566600 | 4.52890800 | 43.53655000 | H | 26.66412700 | 5.06671400  | 46.93000800 |
| C | 14.48111500 | 4.66104300 | 44.77214200 | C | 21.66763000 | 5.86945700  | 49.46900700 |
| C | 14.78424200 | 6.12925600 | 45.13667800 | H | 21.46317300 | 5.84946600  | 50.53578300 |
| O | 15.75822700 | 6.41795200 | 45.84427000 | C | 18.95719100 | 6.46054700  | 45.49789700 |
| C | 15.75623100 | 3.80657700 | 44.77907000 | H | 17.89280500 | 6.59041700  | 45.32413300 |
| C | 16.20898300 | 3.45418300 | 46.19944200 | C | 23.99787300 | 5.66736900  | 43.61394200 |
| H | 13.82743600 | 4.27857300 | 45.56431400 | C | 25.34269000 | 5.35630300  | 43.14547700 |
| H | 14.15580000 | 4.82751600 | 42.66883700 | C | 26.09173600 | 5.20175800  | 44.27820400 |
| H | 16.56111400 | 4.28720400 | 44.21372500 | C | 25.22457500 | 5.39778100  | 45.41118900 |
| H | 15.52388800 | 2.86001100 | 44.27373500 | C | 25.77273400 | 5.22969700  | 41.71165400 |
| O | 15.43315000 | 3.41497400 | 47.14931000 | H | 26.86310100 | 5.33893100  | 41.66035700 |
| N | 17.52616800 | 3.13126500 | 46.31746600 | H | 25.35967000 | 6.04369400  | 41.10586700 |
| H | 17.84380600 | 2.80743200 | 47.22017300 | C | 25.37228000 | 3.90581300  | 41.02330800 |
| H | 18.16663600 | 3.04691000 | 45.53532900 | H | 25.93951000 | 3.05700700  | 41.41958000 |
| N | 13.88964400 | 7.03937300 | 44.69038600 | H | 24.31286900 | 3.69248500  | 41.23124700 |
| C | 13.96060000 | 8.45411800 | 45.02549300 | C | 25.51096600 | 3.96803400  | 39.48073100 |
| H | 12.97909700 | 8.76318300 | 45.41018800 | O | 25.72717200 | 2.85562300  | 38.87778300 |
| C | 14.34844600 | 9.34500600 | 43.83607700 | O | 25.36984200 | 5.07702700  | 38.92932800 |
| C | 15.78461900 | 9.13025400 | 43.35121800 | C | 24.77103700 | 5.38141900  | 47.83903500 |
| H | 14.68801700 | 8.55042200 | 45.83656300 | C | 25.19579100 | 5.25588800  | 49.21305500 |
| H | 13.65239100 | 9.16042500 | 43.00932100 | C | 24.08260100 | 5.42029000  | 49.98034700 |
| H | 15.93703900 | 8.08904400 | 43.04629500 | C | 22.98243100 | 5.64410000  | 49.07207600 |
| H | 15.99208000 | 9.76586300 | 42.48379200 | C | 20.58713100 | 6.09154200  | 48.62389000 |
| H | 13.16872400 | 6.75402500 | 44.02978000 | C | 19.21861400 | 6.23187000  | 49.06144700 |
| N | 31.71485800 | 0.52436900 | 44.35616200 | C | 18.45545200 | 6.37784400  | 47.94211000 |
| C | 31.88653300 | 0.64983000 | 42.91704000 | C | 19.36431400 | 6.34425900  | 46.82345600 |
| C | 30.60388000 | 1.17651600 | 42.27249300 | C | 19.80982900 | 6.41065400  | 44.40673200 |
| O | 29.52586100 | 1.11447700 | 42.86063300 | C | 19.39183200 | 6.56775000  | 43.03538400 |



|    |             |             |             |                                  |             |             |             |
|----|-------------|-------------|-------------|----------------------------------|-------------|-------------|-------------|
| C  | 20.51226500 | 6.44593600  | 42.27122600 | H                                | 14.20972400 | 10.39341200 | 44.13988100 |
| C  | 21.61216400 | 6.19371200  | 43.17351800 | H                                | 16.51252600 | 9.35980500  | 44.13993700 |
| N  | 23.94786700 | 5.68335600  | 44.98779000 | H                                | 32.42134400 | -0.10929700 | 44.72391700 |
| N  | 23.42312000 | 5.60908700  | 47.77662800 | H                                | 32.11599600 | -0.29599700 | 42.38388600 |
| N  | 20.65642700 | 6.17465200  | 47.25544500 | H                                | 27.55077900 | -2.25222600 | 45.50293100 |
| N  | 21.16922900 | 6.19017000  | 44.47024900 | H                                | 20.60398000 | 6.50641700  | 41.19452100 |
| Fe | 22.29785400 | 5.85521700  | 46.12992500 | H                                | 18.36729100 | 6.71943500  | 42.72184800 |
| O  | 21.96347800 | 4.07472600  | 46.05719600 | H                                | 17.38244000 | 6.47309800  | 47.83652800 |
| C  | 23.81885100 | -1.68764200 | 41.95325000 | H                                | 18.89779200 | 6.19550900  | 50.09524400 |
| N  | 24.86902900 | -0.74698600 | 41.62705700 | H                                | 23.99529100 | 5.39100300  | 51.05940300 |
| C  | 25.93765300 | -0.34425100 | 42.37138400 | H                                | 26.21326800 | 5.06212500  | 49.52868400 |
| O  | 26.70862200 | 0.51165500  | 41.94555400 | H                                | 27.14492900 | 4.95561400  | 44.34394300 |
| C  | 26.14476300 | -0.92539900 | 43.78780800 | H                                | 27.73366600 | -0.96005800 | 37.80583800 |
| N  | 27.56268400 | -0.75787100 | 44.10097900 | H                                | 25.05958100 | 5.62257300  | 36.81762200 |
| C  | 28.20889800 | -1.49827300 | 45.02288500 | H                                | 16.55429100 | 3.04759700  | 36.15507900 |
| O  | 29.39401500 | -1.40332400 | 45.33310100 | H                                | 12.00042400 | 6.70001300  | 39.15381800 |
| C  | 25.19398900 | -0.22681200 | 44.75572900 |                                  |             |             |             |
| C  | 25.14568400 | 1.17358700  | 44.80643300 | <sup>4</sup> TS <sub>2HA,B</sub> |             |             |             |
| C  | 24.22966000 | 1.83061600  | 45.61535200 | C                                | 24.97157700 | 5.87197700  | 35.75213400 |
| C  | 23.32277200 | 1.09930800  | 46.40739600 | S                                | 24.18463900 | 4.45336500  | 34.89947300 |
| C  | 23.39651600 | -0.30324000 | 46.39962400 | C                                | 25.31150800 | 3.12279600  | 35.46176300 |
| C  | 24.31906400 | -0.95049200 | 45.57766300 | H                                | 24.30229900 | 6.73119000  | 35.64650100 |
| O  | 22.39120500 | 1.69937800  | 47.17372400 | H                                | 25.40807400 | 3.12854300  | 36.55379900 |
| C  | 22.49552700 | -1.17615600 | 41.27913900 | H                                | 24.88472100 | 2.17201400  | 35.12960400 |
| C  | 21.79592100 | -0.11241300 | 42.11255000 | H                                | 26.29734200 | 3.24439400  | 35.00100400 |
| C  | 20.55839800 | -0.40637400 | 42.71918200 | H                                | 25.92876700 | 6.11294400  | 35.27764400 |
| C  | 19.90270900 | 0.54088700  | 43.48104300 | H                                | 21.11250700 | 2.12634000  | 34.66367000 |
| C  | 20.46616100 | 1.86830200  | 43.71114500 | C                                | 20.72915400 | 1.75359600  | 35.62152100 |
| C  | 21.74291500 | 2.11821500  | 43.07059200 | C                                | 20.08078100 | 2.88486700  | 36.40642000 |
| C  | 22.36676400 | 1.17312100  | 42.29321300 | O                                | 19.08956400 | 2.67361800  | 37.12193400 |
| O  | 19.89103300 | 2.74565100  | 44.40691100 | C                                | 21.88377700 | 1.08291600  | 36.39701400 |
| Cl | 18.36935100 | 0.16332900  | 44.21045500 | C                                | 21.50530800 | 0.55541200  | 37.78355400 |
| C  | 24.14898600 | -3.11272600 | 41.43065200 | C                                | 20.51362800 | -0.59799900 | 37.73330400 |
| O  | 24.81334900 | -3.24027000 | 40.41306900 | H                                | 22.42481300 | 0.20632700  | 38.27212500 |
| C  | 23.71408200 | -4.30477300 | 42.21420200 | H                                | 19.95103300 | 1.01509500  | 35.41451600 |
| O  | 21.65943300 | -2.29118500 | 41.02400600 | H                                | 21.10780500 | 1.35779600  | 38.41616600 |
| C  | 22.83090600 | -4.24750500 | 43.30691000 | H                                | 22.71187100 | 1.79009600  | 36.51707200 |
| C  | 22.47012800 | -5.39867200 | 43.99794100 | H                                | 22.25324900 | 0.24714100  | 35.79339200 |
| C  | 22.99519600 | -6.63561500 | 43.60679400 | H                                | 19.71659000 | -0.09625700 | 39.57360400 |
| C  | 23.87466700 | -6.71223900 | 42.51811600 | O                                | 20.32788300 | -1.29388500 | 36.74964800 |
| C  | 24.22242700 | -5.55673700 | 41.83137000 | N                                | 19.86461200 | -0.87720200 | 38.94191800 |
| O  | 22.61762600 | -7.73684500 | 44.32017600 | H                                | 19.04299300 | -1.46257400 | 38.82276800 |
| H  | 23.68516500 | -1.70801600 | 43.03564500 | N                                | 20.67732900 | 4.09559900  | 36.28898400 |
| H  | 24.88942600 | -0.38220900 | 40.66482900 | C                                | 20.27914400 | 5.28361400  | 37.03652400 |
| H  | 25.91344100 | -1.99815800 | 43.78576800 | H                                | 19.84613000 | 6.01908100  | 36.34302600 |
| H  | 28.08368100 | -0.04372800 | 43.58243500 | C                                | 21.45512900 | 5.91298700  | 37.79546800 |
| H  | 25.82433000 | 1.75489900  | 44.18789600 | H                                | 21.09909400 | 6.84829900  | 38.24937700 |
| H  | 24.17967900 | 2.91200700  | 45.62381200 | C                                | 22.06797800 | 5.00127900  | 38.86069800 |
| H  | 22.70804400 | -0.86569600 | 47.02360500 | H                                | 19.48645700 | 4.97633300  | 37.72327200 |
| H  | 24.35056800 | -2.03976700 | 45.56904700 | H                                | 22.35191800 | 4.03438100  | 38.43247300 |
| H  | 22.28854400 | 2.65289200  | 46.88467500 | H                                | 22.23139200 | 6.20019300  | 37.07430500 |
| H  | 22.81501500 | -0.72754200 | 40.32955000 | H                                | 21.55242000 | 4.14909500  | 35.77158300 |
| H  | 20.12638700 | -1.39018200 | 42.57671000 | H                                | 22.98646000 | 5.43650700  | 39.26437000 |
| H  | 22.18472200 | 3.09400200  | 43.23951800 | H                                | 21.36402700 | 4.81429600  | 39.68103700 |
| H  | 23.31789700 | 1.40471500  | 41.82581800 | C                                | 15.51631700 | 2.95443400  | 36.78703100 |
| H  | 21.16760600 | 3.90504200  | 45.51411900 | C                                | 15.61900300 | 3.65057500  | 38.13228400 |
| H  | 21.09345700 | -2.04564100 | 40.26133700 | O                                | 14.65035500 | 4.20710100  | 38.66054900 |
| H  | 22.39666600 | -3.30343800 | 43.61608800 | C                                | 14.81240100 | 1.57681300  | 36.90818200 |
| H  | 21.78323800 | -5.35958200 | 44.83715600 | C                                | 13.37171400 | 1.59384900  | 37.45739600 |
| H  | 24.28163700 | -7.67600400 | 42.21476700 | C                                | 12.39189800 | 2.35762100  | 36.55658600 |
| H  | 24.89774500 | -5.59633300 | 40.98301200 | C                                | 12.86873500 | 0.16383400  | 37.70878300 |
| H  | 23.05034600 | -8.51739200 | 43.93987500 | H                                | 13.57059900 | -0.40119700 | 38.33700100 |
| H  | 23.11949600 | 8.48119400  | 43.86067300 | H                                | 11.90639900 | 0.19155300  | 38.23049200 |
|    |             |             |             | H                                | 12.74814900 | -0.39063800 | 36.76599000 |

|   |             |            |             |   |             |             |             |
|---|-------------|------------|-------------|---|-------------|-------------|-------------|
| H | 12.27535400 | 1.86376800 | 35.57981000 | H | 15.91341300 | 8.13442100  | 42.92662900 |
| H | 11.42073400 | 2.41516200 | 37.05574900 | H | 15.90761000 | 9.79210800  | 42.30682300 |
| H | 12.72212000 | 3.38828200 | 36.38411800 | H | 13.20185500 | 6.77350900  | 44.00448800 |
| H | 14.94283800 | 3.60763800 | 36.12161600 | N | 31.54806900 | 0.41832800  | 44.55365900 |
| H | 13.37115600 | 2.11448200 | 38.41933500 | C | 31.77335800 | 0.59621200  | 43.12740800 |
| H | 15.43428600 | 0.93214900 | 37.54595000 | C | 30.51164700 | 1.13408200  | 42.45179500 |
| H | 14.82144500 | 1.11452400 | 35.90967700 | O | 29.41285100 | 1.04751700  | 42.99810300 |
| N | 16.83471600 | 3.60864800 | 38.75599900 | H | 30.63549600 | -0.01928900 | 44.70231700 |
| C | 16.94902200 | 3.92484800 | 40.17775000 | H | 32.61088000 | 1.28967600  | 42.96481900 |
| C | 16.71565900 | 5.40710900 | 40.52433400 | N | 30.65951400 | 1.68175600  | 41.21314200 |
| O | 16.51747500 | 5.74184500 | 41.69289100 | C | 29.49937200 | 1.96436000  | 40.36812800 |
| C | 18.29874300 | 3.44898200 | 40.72720700 | C | 29.01127400 | 0.66347500  | 39.68128300 |
| H | 17.63223000 | 3.19260500 | 38.27411800 | O | 29.72715100 | -0.33894100 | 39.63308100 |
| H | 16.14358200 | 3.40691600 | 40.71204900 | C | 30.08734200 | 2.94365300  | 39.33452800 |
| H | 19.13270000 | 3.91657900 | 40.19303000 | C | 31.49329200 | 2.36263200  | 39.09273500 |
| H | 18.38374000 | 3.69950500 | 41.78688200 | C | 31.92032200 | 1.81380500  | 40.47298700 |
| H | 18.38716300 | 2.36259500 | 40.61943900 | H | 31.43390600 | 1.53869400  | 38.37566200 |
| N | 16.75187500 | 6.29422400 | 39.49369800 | H | 28.69472800 | 2.39167800  | 40.96934200 |
| C | 16.33550000 | 7.67581700 | 39.65730600 | H | 32.59390000 | 2.50956400  | 40.99213100 |
| C | 14.82278300 | 9.95187400 | 39.79943600 | H | 32.43118100 | 0.84884800  | 40.37924700 |
| O | 14.46114500 | 9.10901800 | 40.00499200 | H | 32.20323100 | 3.10109200  | 38.70583500 |
| H | 16.79672300 | 5.90194100 | 38.56358600 | H | 30.14938000 | 3.94645700  | 39.77405200 |
| H | 16.79604000 | 8.08132400 | 40.56070800 | H | 29.47936000 | 3.00547300  | 38.42826100 |
| H | 16.70477800 | 8.25984400 | 38.80918100 | N | 27.80214400 | 0.75331500  | 39.08516000 |
| N | 13.99631200 | 6.88624200 | 39.68302800 | C | 27.17139000 | -0.43834900 | 38.53206100 |
| C | 12.57156800 | 6.97242200 | 39.97462900 | C | 25.81766000 | -0.12253500 | 37.88422000 |
| C | 12.23190400 | 6.25307700 | 41.29388300 | O | 24.87566800 | 0.38106200  | 38.84243500 |
| O | 12.02785100 | 6.88835100 | 42.33647100 | C | 25.21741100 | -1.37211400 | 37.24600100 |
| H | 14.36795500 | 5.96175200 | 39.47143200 | H | 27.03090300 | -1.19290200 | 39.31770900 |
| H | 12.31683000 | 8.02668600 | 40.08015200 | H | 24.27138700 | -1.12855200 | 36.75079600 |
| N | 12.24113800 | 4.90367300 | 41.20813800 | H | 25.89844900 | -1.79309000 | 36.49680000 |
| C | 11.71369000 | 4.05282000 | 42.27549300 | H | 27.19983500 | 1.55899900  | 39.27275500 |
| C | 12.44171200 | 4.17879800 | 43.62109600 | H | 25.97146700 | 0.64904100  | 37.11624000 |
| O | 11.85700200 | 3.90057200 | 44.66304400 | H | 25.02289700 | -2.13158900 | 38.00987000 |
| C | 11.75669300 | 2.57609800 | 41.81617000 | H | 25.09899600 | 1.34180100  | 38.99675200 |
| C | 11.10408600 | 2.26518600 | 40.43003200 | C | 23.63869700 | 8.87633300  | 44.92676500 |
| O | 11.21252500 | 3.14898800 | 39.52568700 | S | 22.49944400 | 8.31478600  | 46.23365100 |
| O | 10.58668800 | 1.13350600 | 40.32016200 | H | 23.70464300 | 9.96767400  | 44.98009300 |
| H | 12.08362400 | 4.43815800 | 40.28904500 | H | 24.63195600 | 8.43636100  | 45.05111900 |
| H | 10.67610700 | 4.33433400 | 42.49468200 | C | 22.99037300 | 6.05047000  | 42.74026700 |
| H | 11.28637100 | 1.95914500 | 42.58450900 | H | 23.20002000 | 6.05623100  | 41.67567100 |
| H | 12.80802700 | 2.26153100 | 41.74711100 | C | 25.61526000 | 5.32528700  | 46.73914300 |
| N | 13.76138900 | 4.54072400 | 43.57424800 | H | 26.65907700 | 5.10914000  | 46.94660100 |
| C | 14.55554100 | 4.71446800 | 44.78077000 | C | 21.60999100 | 5.83764100  | 49.40436500 |
| C | 14.84204500 | 6.19642900 | 45.10180200 | H | 21.38391500 | 5.78530500  | 50.46558000 |
| O | 15.82160000 | 6.51780200 | 45.78739800 | C | 18.98699600 | 6.59131900  | 45.40346700 |
| C | 15.84509100 | 3.88067700 | 44.76264500 | H | 17.92799400 | 6.73901800  | 45.21329500 |
| C | 16.33933500 | 3.54579500 | 46.17389000 | C | 24.04631000 | 5.74883100  | 43.59460700 |
| H | 13.93645500 | 4.34040700 | 45.60405900 | C | 25.39429100 | 5.42887200  | 43.14417000 |
| H | 14.16302300 | 4.81194000 | 42.68459100 | C | 26.12761000 | 5.26956400  | 44.28724700 |
| H | 16.62751100 | 4.36882700 | 44.17298400 | C | 25.24540800 | 5.46168100  | 45.40772200 |
| H | 15.61613700 | 2.92618000 | 44.27082100 | C | 25.83859100 | 5.28805400  | 41.71652400 |
| O | 15.59275900 | 3.53792600 | 47.14858700 | H | 26.93021100 | 5.38967100  | 41.67499800 |
| N | 17.65514800 | 3.20928200 | 46.25844500 | H | 25.43619700 | 6.09778100  | 41.09788700 |
| H | 17.98487600 | 2.87771100 | 47.15434900 | C | 25.43311700 | 3.95926400  | 41.03977600 |
| H | 18.27075600 | 3.07179000 | 45.46170200 | H | 25.99466200 | 3.11088100  | 41.44501000 |
| N | 13.93001200 | 7.08368400 | 44.64532500 | H | 24.37294400 | 3.75237900  | 41.24951500 |
| C | 13.98530500 | 8.50704600 | 44.94571300 | C | 25.57350300 | 4.00596500  | 39.49646800 |
| H | 13.01152200 | 8.80811800 | 45.35573700 | O | 25.79206300 | 2.88883100  | 38.90606700 |
| C | 14.31670600 | 9.37576600 | 43.72309800 | O | 25.42963000 | 5.11066000  | 38.93559100 |
| C | 15.74260300 | 9.18122500 | 43.20086300 | C | 24.74593900 | 5.39435700  | 47.82402600 |
| H | 14.73720400 | 8.63521800 | 45.72953200 | C | 25.14239300 | 5.23145400  | 49.20095500 |
| H | 13.60046500 | 9.15294900 | 42.92342200 | C | 24.01206900 | 5.36923300  | 49.94947700 |

|    |             |             |             |                         |             |             |             |
|----|-------------|-------------|-------------|-------------------------|-------------|-------------|-------------|
| C  | 22.93178300 | 5.61753900  | 49.02610500 | H                       | 20.96855800 | -2.02032300 | 40.22981900 |
| C  | 20.55029000 | 6.09832900  | 48.54546000 | H                       | 22.31976800 | -3.46155300 | 43.38715800 |
| C  | 19.17588800 | 6.24181400  | 48.96110500 | H                       | 21.73484800 | -5.55832300 | 44.55530900 |
| C  | 18.43597200 | 6.43581800  | 47.83343900 | H                       | 24.26625000 | -7.76975900 | 41.87477000 |
| C  | 19.36603600 | 6.42794900  | 46.73252500 | H                       | 24.85373800 | -5.64973300 | 40.69859700 |
| C  | 19.86119700 | 6.55686800  | 44.32899100 | H                       | 23.04405600 | -8.67375500 | 43.57353300 |
| C  | 19.47036300 | 6.74525700  | 42.95392200 | H                       | 23.25568000 | 8.59499700  | 43.93933500 |
| C  | 20.60116200 | 6.61318800  | 42.20706300 | H                       | 14.16206100 | 10.42824800 | 44.00410000 |
| C  | 21.68003500 | 6.32660900  | 43.12390000 | H                       | 16.48744000 | 9.45665100  | 43.95873800 |
| N  | 23.97456800 | 5.75359500  | 44.96753900 | H                       | 32.23795700 | -0.23171500 | 44.92415500 |
| N  | 23.39774200 | 5.61813100  | 47.73919700 | H                       | 32.03324200 | -0.32792800 | 42.57101600 |
| N  | 20.64716200 | 6.22515900  | 47.18111200 | H                       | 27.31365600 | -2.34247700 | 45.50053700 |
| N  | 21.21485800 | 6.31152200  | 44.41267900 | H                       | 20.71348300 | 6.68437600  | 41.13295100 |
| Fe | 22.30572200 | 5.94304100  | 46.07725400 | H                       | 18.45294700 | 6.91599200  | 42.62792600 |
| O  | 21.92082400 | 4.10741500  | 45.90947500 | H                       | 17.36608800 | 6.54116200  | 47.70889700 |
| C  | 23.77647200 | -1.78412700 | 41.80498100 | H                       | 18.83453300 | 6.17196200  | 49.98654600 |
| N  | 24.84748300 | -0.85738900 | 41.50897600 | H                       | 23.90176300 | 5.30770400  | 51.02504900 |
| C  | 25.86747800 | -0.42756400 | 42.29887400 | H                       | 26.15368000 | 5.03067500  | 49.53175800 |
| O  | 26.65745500 | 0.42617100  | 41.90408900 | H                       | 27.17786700 | 5.01511000  | 44.36730200 |
| C  | 26.00144200 | -0.97617300 | 43.73910000 | H                       | 27.84272700 | -0.87811300 | 37.78423600 |
| N  | 27.41121300 | -0.84703800 | 44.10159700 | H                       | 25.12299600 | 5.63810400  | 36.81275400 |
| C  | 28.00492200 | -1.60047400 | 45.04911300 | H                       | 16.51428800 | 2.81356500  | 36.35676900 |
| O  | 29.17805800 | -1.52781900 | 45.40560600 | H                       | 12.00395500 | 6.53024500  | 39.14684000 |
| C  | 25.05381100 | -0.20026800 | 44.64602400 |                         |             |             |             |
| C  | 25.12364200 | 1.20425900  | 44.68677100 | <b>41M2<sub>B</sub></b> |             |             |             |
| C  | 24.23468100 | 1.93890200  | 45.44501500 | C                       | 24.95771900 | 5.64908300  | 35.47196800 |
| C  | 23.22370300 | 1.30071200  | 46.23469300 | S                       | 24.13832500 | 4.20544100  | 34.69526700 |
| C  | 23.18905700 | -0.12821600 | 46.21368500 | C                       | 25.22943800 | 2.87943200  | 35.33354700 |
| C  | 24.08040300 | -0.84739800 | 45.43257500 | H                       | 24.31102600 | 6.51738700  | 35.31368100 |
| O  | 22.37666900 | 1.97648200  | 46.94841600 | H                       | 25.32823200 | 2.94653800  | 36.42331700 |
| C  | 22.45705100 | -1.21661300 | 41.17442800 | H                       | 24.77502100 | 1.92331800  | 35.05789400 |
| C  | 21.81205700 | -0.14320000 | 42.03800800 | H                       | 26.21733100 | 2.94582000  | 34.86592100 |
| C  | 20.61501600 | -0.42675100 | 42.72491100 | H                       | 25.92286800 | 5.83824700  | 34.99032500 |
| C  | 20.01031800 | 0.52733400  | 43.52148500 | H                       | 21.03472000 | 1.91299500  | 34.64851000 |
| C  | 20.57328600 | 1.85391400  | 43.70667900 | C                       | 20.63200600 | 1.63186100  | 35.62954900 |
| C  | 21.80849700 | 2.09083900  | 42.99474500 | C                       | 20.01102100 | 2.84449600  | 36.30822700 |
| C  | 22.38612700 | 1.13926800  | 42.17973500 | O                       | 18.98586100 | 2.72764400  | 36.99752100 |
| O  | 20.02186000 | 2.74505600  | 44.41987300 | C                       | 21.76116000 | 0.99675700  | 36.46957800 |
| Cl | 18.51280600 | 0.14748800  | 44.33870100 | C                       | 21.35360300 | 0.57395300  | 37.88385300 |
| C  | 24.07653100 | -3.18791600 | 41.21633100 | C                       | 20.39192200 | -0.60572500 | 37.90494900 |
| O  | 24.70784300 | -3.28132200 | 40.17395800 | H                       | 22.26481500 | 0.29216600  | 38.42829800 |
| C  | 23.65590700 | -4.40727200 | 41.96604800 | H                       | 19.83391100 | 0.90204100  | 35.47519200 |
| O  | 21.58772300 | -2.31098900 | 40.93225000 | H                       | 20.91214400 | 1.41340500  | 38.43502600 |
| C  | 22.77141300 | -4.39095600 | 43.05893400 | H                       | 22.59987300 | 1.69689900  | 36.55256000 |
| C  | 22.42476900 | -5.56529900 | 43.71764500 | H                       | 22.12539100 | 0.11501000  | 35.93189400 |
| C  | 22.96655100 | -6.78411600 | 43.29391400 | H                       | 19.68470500 | -0.08461200 | 39.77970100 |
| C  | 23.84682700 | -6.81985000 | 42.20395300 | O                       | 20.17866000 | -1.33121200 | 36.94891000 |
| C  | 24.17917600 | -5.64161700 | 41.54848600 | N                       | 19.80578000 | -0.87146600 | 39.14928400 |
| O  | 22.60345800 | -7.90957900 | 43.97725800 | H                       | 18.98454100 | -1.46538300 | 39.08050100 |
| H  | 23.64730400 | -1.84827300 | 42.88513500 | N                       | 20.66567900 | 4.01676000  | 36.12970500 |
| H  | 24.88706600 | -0.47412100 | 40.55446400 | C                       | 20.29445100 | 5.26930300  | 36.78057300 |
| H  | 25.73130900 | -2.03855400 | 43.76781800 | H                       | 19.92372100 | 5.97441900  | 36.02260300 |
| H  | 27.96561900 | -0.13678100 | 43.61242500 | C                       | 21.46635600 | 5.89552800  | 37.54805700 |
| H  | 25.87718700 | 1.71512700  | 44.09373800 | H                       | 21.13330100 | 6.86851800  | 37.93452900 |
| H  | 24.28728500 | 3.01967800  | 45.45662400 | C                       | 21.99744700 | 5.02423400  | 38.68771200 |
| H  | 22.43589300 | -0.62590200 | 46.81727200 | H                       | 19.46186600 | 5.04296800  | 37.45134400 |
| H  | 24.02867200 | -1.93605600 | 45.42592900 | H                       | 22.27130900 | 4.02851900  | 38.32385900 |
| H  | 22.20454400 | 3.16969200  | 46.49022200 | H                       | 22.28169400 | 6.10872900  | 36.84469000 |
| H  | 22.76832900 | -0.77231400 | 40.22004200 | H                       | 21.55565200 | 4.00079000  | 35.63471400 |
| H  | 20.16669300 | -1.40821200 | 42.61792500 | H                       | 22.90579400 | 5.45724800  | 39.11506700 |
| H  | 22.25565100 | 3.07234600  | 43.11132900 | H                       | 21.24856500 | 4.90103400  | 39.47991300 |
| H  | 23.30347900 | 1.37856400  | 41.65087300 | C                       | 15.59724200 | 3.50083000  | 36.34412500 |
| H  | 21.14500100 | 3.86783000  | 45.35021000 | C                       | 15.60238100 | 4.07713100  | 37.74875100 |
|    |             |             |             | O                       | 14.60919400 | 4.62985000  | 38.23222300 |

|   |             |             |             |   |             |             |             |
|---|-------------|-------------|-------------|---|-------------|-------------|-------------|
| C | 15.03501600 | 2.05464300  | 36.33070000 | N | 13.80058300 | 6.82014200  | 44.78182800 |
| C | 13.62229600 | 1.87683800  | 36.92221600 | C | 13.79674800 | 8.22280500  | 45.17154300 |
| C | 12.54330100 | 2.64034100  | 36.14238600 | H | 12.78721300 | 8.47380700  | 45.52424300 |
| C | 13.25855900 | 0.38824700  | 37.03135000 | C | 14.19682400 | 9.17906100  | 44.03816100 |
| H | 14.03776500 | -0.17585800 | 37.56148100 | C | 15.65231300 | 9.02440400  | 43.59017100 |
| H | 12.32554200 | 0.27207500  | 37.59281900 | H | 14.48428500 | 8.31688600  | 46.01709500 |
| H | 13.13728500 | -0.06802100 | 36.03764700 | H | 13.53307100 | 9.01902400  | 43.18024700 |
| H | 12.44482800 | 2.25677400  | 35.11535400 | H | 15.83802400 | 8.00487300  | 43.23510300 |
| H | 11.58613400 | 2.53931200  | 36.66154400 | H | 15.87145600 | 9.71105500  | 42.76573600 |
| H | 12.76626100 | 3.71168500  | 36.09338300 | H | 13.09542100 | 6.51904300  | 44.11250900 |
| H | 14.97777500 | 4.15534300  | 35.72409000 | N | 31.71687400 | 0.30656400  | 44.33342700 |
| H | 13.61263900 | 2.28882700  | 37.93662300 | C | 31.84793800 | 0.50144300  | 42.89735000 |
| H | 15.74138400 | 1.41273300  | 36.87555300 | C | 30.53935900 | 1.03329200  | 42.31267100 |
| H | 15.04810900 | 1.70405500  | 35.28769500 | O | 29.48403800 | 0.94099100  | 42.93946800 |
| N | 16.75553300 | 3.92040200  | 38.46823400 | H | 30.80515200 | -0.10997400 | 44.53488000 |
| C | 16.74909700 | 4.03159600  | 39.92678800 | H | 32.66685900 | 1.20409900  | 42.68647500 |
| C | 16.51819900 | 5.45482100  | 40.46629800 | N | 30.59316500 | 1.58229800  | 41.06951000 |
| O | 16.24187600 | 5.62375300  | 41.65525500 | C | 29.37195700 | 1.84944100  | 40.30924400 |
| C | 18.04167000 | 3.44897100  | 40.51050300 | C | 28.83894300 | 0.53236700  | 39.68850100 |
| H | 17.54934300 | 3.45764400  | 38.02150000 | O | 29.52435600 | -0.49220300 | 39.67504100 |
| H | 15.89297100 | 3.46651900  | 40.31616900 | C | 29.87650100 | 2.81478000  | 39.22057500 |
| H | 18.92216700 | 3.97760400  | 40.13006600 | C | 31.26156800 | 2.23234900  | 38.88212200 |
| H | 18.03031400 | 3.54075500  | 41.59864200 | C | 31.79475500 | 1.70963200  | 40.23505800 |
| H | 18.13263800 | 2.39037300  | 40.24383700 | H | 31.15098300 | 1.39571400  | 38.18556800 |
| N | 16.64251800 | 6.47760500  | 39.58035600 | H | 28.61137100 | 2.28177000  | 40.96191300 |
| C | 16.21666500 | 7.82755100  | 39.90904300 | H | 32.49934200 | 2.41822200  | 40.69151800 |
| C | 14.69905500 | 8.06206800  | 40.07330500 | H | 32.30471600 | 0.74646700  | 40.12007800 |
| O | 14.31716000 | 9.15824000  | 40.47769600 | H | 31.93746800 | 2.96448400  | 38.42857100 |
| H | 16.74501800 | 6.21817100  | 38.60934600 | H | 29.96947600 | 3.82347200  | 39.64021400 |
| H | 16.66547800 | 8.12726400  | 40.85843900 | H | 29.20168700 | 2.86419000  | 38.36239100 |
| H | 16.58929300 | 8.51033100  | 39.13985400 | N | 27.61864000 | 0.62595900  | 39.11834400 |
| N | 13.88790000 | 7.02661300  | 39.75041600 | C | 26.95345900 | -0.56300400 | 38.60110200 |
| C | 12.47258100 | 7.01725000  | 40.08963900 | C | 25.58730300 | -0.22661600 | 37.99163400 |
| C | 12.19643300 | 6.13339000  | 41.32263900 | O | 24.70670900 | 0.35510700  | 38.96664800 |
| O | 11.90951900 | 6.63304900  | 42.41608300 | C | 24.92350600 | -1.47722100 | 37.42279000 |
| H | 14.27687500 | 6.16173900  | 39.37922600 | H | 26.82249200 | -1.30401000 | 39.40059900 |
| H | 12.17613100 | 8.03795800  | 40.32996900 | H | 23.96609200 | -1.22288400 | 36.95654300 |
| N | 12.34666700 | 4.80347500  | 41.10683900 | H | 25.56170300 | -1.94238800 | 36.66199300 |
| C | 11.87282300 | 3.81063300  | 42.07291900 | H | 27.05447100 | 1.47243000  | 39.23485000 |
| C | 12.52287800 | 3.89471300  | 43.46191700 | H | 25.73596000 | 0.51022200  | 37.19027600 |
| O | 11.90268500 | 3.49970700  | 44.44462500 | H | 24.74226700 | -2.20678400 | 38.21785800 |
| C | 12.09376600 | 2.39016300  | 41.50578700 | H | 24.95038300 | 1.32630600  | 39.02560100 |
| C | 11.49527700 | 2.12192300  | 40.09111400 | C | 24.26815600 | 8.79442000  | 46.37209300 |
| O | 11.49972700 | 3.07445400  | 39.25907000 | S | 22.53817400 | 8.36152900  | 45.96267400 |
| O | 11.11199300 | 0.94563300  | 39.88481200 | H | 24.34915800 | 9.88542400  | 46.31324200 |
| H | 12.25603500 | 4.42636600  | 40.14567200 | H | 24.53522100 | 8.47466600  | 47.38329600 |
| H | 10.80245100 | 3.96007500  | 42.26203800 | C | 22.87048700 | 6.07939300  | 42.59596100 |
| H | 11.68737500 | 1.66614000  | 42.21560600 | H | 23.03416200 | 6.08915900  | 41.52343000 |
| H | 13.17484000 | 2.20113300  | 41.43528700 | C | 25.67577800 | 5.48027400  | 46.48823300 |
| N | 13.81223000 | 4.34698100  | 43.51793600 | H | 26.72851300 | 5.27372000  | 46.65908800 |
| C | 14.51700100 | 4.47550000  | 44.78504200 | C | 21.79836600 | 6.14229300  | 49.31923100 |
| C | 14.74798100 | 5.94511600  | 45.19243200 | H | 21.62934200 | 6.17367600  | 50.39199000 |
| O | 15.70945400 | 6.26376700  | 45.90206400 | C | 18.94901900 | 6.40315100  | 45.41839000 |
| C | 15.82099200 | 3.66735100  | 44.83137400 | H | 17.87696600 | 6.48219500  | 45.26457000 |
| C | 16.21992800 | 3.31480800  | 46.26874900 | C | 23.97502200 | 5.83032300  | 43.40745300 |
| H | 13.84825800 | 4.05051700  | 45.54200500 | C | 25.30844800 | 5.51295900  | 42.90354000 |
| H | 14.25818500 | 4.70038800  | 42.67774900 | C | 26.08573100 | 5.35535700  | 44.01498100 |
| H | 16.63339700 | 4.18336100  | 44.31005900 | C | 25.24593600 | 5.56053500  | 45.17028900 |
| H | 15.64464700 | 2.71952600  | 44.30630100 | C | 25.69876000 | 5.35570100  | 41.46137400 |
| O | 15.39656700 | 3.22649000  | 47.17537200 | H | 26.78438200 | 5.48704300  | 41.37118100 |
| N | 17.54171700 | 3.05498000  | 46.45489500 | H | 25.25034700 | 6.13971200  | 40.84201300 |
| H | 17.81764800 | 2.72803300  | 47.37009200 | C | 25.30996400 | 3.99553900  | 40.84137500 |
| H | 18.22749600 | 2.98767700  | 45.70851700 | H | 25.86401500 | 3.17177400  | 41.30460400 |

|    |             |             |             |                                 |             |             |             |
|----|-------------|-------------|-------------|---------------------------------|-------------|-------------|-------------|
| H  | 24.24598500 | 3.79735700  | 41.04213000 | H                               | 24.19070700 | -1.96027400 | 45.56972600 |
| C  | 25.48558700 | 3.95661300  | 39.30415300 | H                               | 22.25930600 | 3.51071700  | 46.64432600 |
| O  | 25.68558900 | 2.79946300  | 38.77842400 | H                               | 22.74649600 | -0.71169400 | 40.37129200 |
| O  | 25.39055400 | 5.02794700  | 38.67687000 | H                               | 20.21610700 | -1.44316200 | 42.86229400 |
| C  | 24.86359100 | 5.64135600  | 47.61060600 | H                               | 22.05849100 | 3.16268600  | 43.16969000 |
| C  | 25.32959400 | 5.58952400  | 48.97406300 | H                               | 23.11521100 | 1.50944100  | 41.66972700 |
| C  | 24.23949500 | 5.79254200  | 49.76843100 | H                               | 21.21249000 | 3.74272900  | 45.47374100 |
| C  | 23.10824000 | 5.95993000  | 48.88999800 | H                               | 20.97063000 | -2.01033700 | 40.40481400 |
| C  | 20.68050700 | 6.25132800  | 48.49820900 | H                               | 22.28366200 | -3.32054400 | 43.56397500 |
| C  | 19.31888900 | 6.35459700  | 48.97666300 | H                               | 21.73112500 | -5.38374200 | 44.80575700 |
| C  | 18.51473000 | 6.39906800  | 47.87952600 | H                               | 24.46851600 | -7.60807100 | 42.34746600 |
| C  | 19.39095900 | 6.34067000  | 46.73254500 | H                               | 25.02498500 | -5.52243500 | 41.09850000 |
| C  | 19.78513000 | 6.38179300  | 44.30498800 | H                               | 23.20615700 | -8.48338300 | 44.03541700 |
| C  | 19.32345500 | 6.50906200  | 42.94304500 | H                               | 24.97011600 | 8.35004400  | 45.66126300 |
| C  | 20.43167500 | 6.45526500  | 42.15388500 | H                               | 14.02026000 | 10.20758800 | 44.38739800 |
| C  | 21.56571100 | 6.27452600  | 43.03269000 | H                               | 16.35019200 | 9.22502100  | 44.41248500 |
| N  | 23.95996500 | 5.84216800  | 44.77616500 | H                               | 32.41554200 | -0.36258000 | 44.64871800 |
| N  | 23.51168800 | 5.86768400  | 47.57937100 | H                               | 32.07771600 | -0.41547800 | 42.31701200 |
| N  | 20.70162800 | 6.24226600  | 47.12877200 | H                               | 27.42287800 | -2.36353700 | 45.46701600 |
| N  | 21.14709000 | 6.24348100  | 44.33898800 | H                               | 20.49541800 | 6.51945200  | 41.07518800 |
| Fe | 22.33824100 | 6.12176900  | 45.95644100 | H                               | 18.28390000 | 6.60041100  | 42.65610000 |
| O  | 22.06540000 | 4.06689500  | 45.85835900 | H                               | 17.43600100 | 6.44782200  | 47.80558500 |
| C  | 23.76880500 | -1.65864200 | 41.99127200 | H                               | 19.03493600 | 6.36913100  | 50.02195200 |
| N  | 24.80496700 | -0.69310600 | 41.68138800 | H                               | 24.18833000 | 5.81501000  | 50.85016600 |
| C  | 25.83473800 | -0.26002600 | 42.45109600 | H                               | 26.35707400 | 5.41433400  | 49.26861100 |
| O  | 26.58449200 | 0.64027200  | 42.08659700 | H                               | 27.14058500 | 5.10906600  | 44.05432400 |
| C  | 26.05435800 | -0.89577700 | 43.85059500 | H                               | 27.59152500 | -1.02785900 | 37.83867300 |
| N  | 27.47988500 | -0.79691700 | 44.14059700 | H                               | 25.09783600 | 5.47113800  | 36.54497900 |
| C  | 28.10917000 | -1.61969000 | 45.00985400 | H                               | 16.61370400 | 3.48986600  | 35.93487800 |
| O  | 29.30118900 | -1.59805300 | 45.29362000 | H                               | 11.89789700 | 6.65273800  | 39.22942500 |
| C  | 25.18965800 | -0.17056900 | 44.87338200 | <sup>4</sup> IM3 <sub>Cyc</sub> |             |             |             |
| C  | 25.30468000 | 1.23442400  | 45.01624400 | C                               | 25.05818000 | 5.99788000  | 35.83587900 |
| C  | 24.48974500 | 1.92107500  | 45.88247000 | S                               | 24.35833700 | 4.59181300  | 34.89109700 |
| C  | 23.49683600 | 1.22826000  | 46.68184000 | C                               | 25.43546300 | 3.25682900  | 35.53452700 |
| C  | 23.43901300 | -0.21536600 | 46.55713600 | H                               | 24.38462200 | 6.85045800  | 35.70813100 |
| C  | 24.25863600 | -0.87826000 | 45.66918800 | H                               | 25.45877300 | 3.27119100  | 36.62906600 |
| O  | 22.70197500 | 1.84750000  | 47.44464000 | H                               | 25.02561800 | 2.30581200  | 35.18271000 |
| C  | 22.43924700 | -1.15344000 | 41.32774100 | H                               | 26.45215900 | 3.36778200  | 35.14371600 |
| C  | 21.75103400 | -0.09619900 | 42.17673900 | H                               | 26.04459300 | 6.26605700  | 35.44317100 |
| C  | 20.61577500 | -0.43744400 | 42.93332900 | H                               | 21.02647000 | 2.37671400  | 34.27605100 |
| C  | 20.00813900 | 0.49214800  | 43.76022900 | C                               | 20.65041500 | 1.91519800  | 35.19714900 |
| C  | 20.51310700 | 1.84386500  | 43.90811600 | C                               | 20.11391900 | 2.97854400  | 36.14747500 |
| C  | 21.66439100 | 2.15461700  | 43.09349300 | O                               | 19.18212700 | 2.71508200  | 36.92514600 |
| C  | 22.24925800 | 1.22495900  | 42.26038600 | C                               | 21.76825900 | 1.05379800  | 35.82329300 |
| O  | 19.99212600 | 2.69631600  | 44.69306300 | C                               | 21.41331200 | 0.44039500  | 37.18290700 |
| Cl | 18.60128400 | 0.02835200  | 44.68649100 | C                               | 20.25033400 | -0.54220500 | 37.10546000 |
| C  | 24.13537600 | -3.07240200 | 41.46876900 | H                               | 22.29238700 | -0.10864500 | 37.54117900 |
| O  | 24.81731700 | -3.18591000 | 40.46112900 | H                               | 19.80354600 | 1.27532400  | 34.93204400 |
| C  | 23.72285300 | -4.27319300 | 42.25187000 | H                               | 21.21184900 | 1.22248000  | 37.92162900 |
| O  | 21.61463200 | -2.28261500 | 41.09263400 | H                               | 22.67545300 | 1.65569100  | 35.94847400 |
| C  | 22.78879200 | -4.24368800 | 43.30304000 | H                               | 22.00381400 | 0.24328300  | 35.12525500 |
| C  | 22.45970000 | -5.39970100 | 44.00160300 | H                               | 19.17903100 | 0.44998800  | 38.53662100 |
| C  | 23.06844000 | -6.61333700 | 43.66092900 | O                               | 20.14298900 | -1.37219400 | 36.21868700 |
| C  | 23.99746800 | -6.66250500 | 42.61265100 | N                               | 19.35187200 | -0.48452900 | 38.17525800 |
| C  | 24.31243700 | -5.50293300 | 41.91660100 | H                               | 18.48923600 | -0.99216800 | 37.99151200 |
| O  | 22.72009900 | -7.71867200 | 44.38204200 | N                               | 20.72208900 | 4.18620000  | 36.08886700 |
| H  | 23.62389900 | -1.69361400 | 43.07181600 | C                               | 20.39702500 | 5.31613000  | 36.95717900 |
| H  | 24.81450400 | -0.31045600 | 40.72333000 | H                               | 20.09645400 | 6.16416200  | 36.32687700 |
| H  | 25.77023000 | -1.95403200 | 43.83402700 | C                               | 21.56885000 | 5.72472400  | 37.85914900 |
| H  | 28.03098800 | -0.09535800 | 43.63229500 | H                               | 21.27849800 | 6.64193400  | 38.38978600 |
| H  | 26.02653800 | 1.76714500  | 44.40432800 | C                               | 21.99471500 | 4.64710800  | 38.85807300 |
| H  | 24.55041800 | 2.99913800  | 45.97266000 | H                               | 19.52620000 | 5.02383600  | 37.54764300 |
| H  | 22.70734400 | -0.73838000 | 47.16533600 | H                               | 22.19142300 | 3.69905700  | 38.34463700 |

|   |             |             |             |   |             |             |             |
|---|-------------|-------------|-------------|---|-------------|-------------|-------------|
| H | 22.42766300 | 5.99248900  | 37.23089700 | H | 15.09423600 | 4.58523700  | 43.42973900 |
| H | 21.57227600 | 4.26444200  | 35.53645600 | H | 17.46949500 | 5.07531900  | 45.19499100 |
| H | 22.92769400 | 4.93478000  | 39.35013500 | H | 17.00304700 | 3.38452200  | 45.41305900 |
| H | 21.21928300 | 4.47056900  | 39.61350400 | O | 16.37658500 | 4.24258000  | 48.14740900 |
| C | 15.79756900 | 3.12069200  | 36.06322600 | N | 18.52963700 | 4.58039800  | 47.52152700 |
| C | 15.64460700 | 3.84298500  | 37.39552800 | H | 18.78251100 | 4.68108500  | 48.49484300 |
| O | 14.58060100 | 4.40273000  | 37.70732700 | H | 19.20839100 | 4.90871800  | 46.84488600 |
| C | 15.86678600 | 1.58308700  | 36.22142700 | N | 13.85209900 | 6.63843600  | 45.20965100 |
| C | 14.73830000 | 0.94927700  | 37.05666100 | C | 13.36460700 | 8.00125400  | 45.36803500 |
| C | 13.35256300 | 1.16462000  | 36.43049900 | H | 12.32200900 | 7.94952100  | 45.70908300 |
| C | 15.00432300 | -0.54459400 | 37.29225100 | C | 13.44376500 | 8.84754500  | 44.08906400 |
| H | 16.03506600 | -0.71114200 | 37.63596000 | C | 14.87044100 | 9.09343100  | 43.59112200 |
| H | 14.34557900 | -0.91936500 | 38.08163500 | H | 13.95978900 | 8.45606000  | 46.16539700 |
| H | 14.86076800 | -1.13870600 | 36.37724300 | H | 12.86575700 | 8.36624600  | 43.29249900 |
| H | 13.29907200 | 0.74713300  | 35.41302600 | H | 15.36758300 | 8.14730200  | 43.34998700 |
| H | 12.58400700 | 0.67313600  | 37.03808500 | H | 14.85447900 | 9.69542800  | 42.67689700 |
| H | 13.09710400 | 2.22882500  | 36.38217600 | H | 13.27636900 | 5.98410400  | 44.68337000 |
| H | 14.94439500 | 3.41745200  | 35.44739800 | N | 30.22793100 | -1.20172300 | 45.18586000 |
| H | 14.71512900 | 1.42129700  | 38.04756000 | C | 30.77569700 | -0.80778800 | 43.89679700 |
| H | 16.83457300 | 1.33398900  | 36.67450000 | C | 29.75715300 | 0.01536900  | 43.11000100 |
| H | 15.88266400 | 1.14100300  | 35.21243100 | O | 28.56903900 | 0.04232000  | 43.43203000 |
| N | 16.74068900 | 3.85270300  | 38.20011600 | H | 29.28815500 | -1.58173400 | 45.05366500 |
| C | 16.67957300 | 4.06559800  | 39.65437200 | H | 31.69251000 | -0.21976300 | 44.04614900 |
| C | 16.47401400 | 5.51814900  | 40.11930600 | N | 30.21206100 | 0.68542500  | 42.01867900 |
| O | 16.65308400 | 5.83131400  | 41.29718200 | C | 29.27379800 | 1.22839500  | 41.03315300 |
| C | 17.90866800 | 3.44202400  | 40.31884700 | C | 28.74109800 | 0.08308700  | 40.13574300 |
| H | 17.59106100 | 3.42416500  | 37.83643400 | O | 29.36037900 | -0.98071500 | 40.03376700 |
| H | 15.78616600 | 3.52665200  | 40.01270400 | C | 30.17244700 | 2.18735200  | 40.23094400 |
| H | 18.84070400 | 3.82414700  | 39.88595600 | C | 31.50819600 | 1.42260100  | 40.16555300 |
| H | 17.90553000 | 3.68095600  | 41.38365900 | C | 31.59337300 | 0.68575900  | 41.52128300 |
| H | 17.88745900 | 2.35382400  | 40.19882800 | H | 31.47434200 | 0.68849100  | 39.35592600 |
| N | 15.99496700 | 6.40076000  | 39.18744100 | H | 28.44423300 | 1.72607500  | 41.53858900 |
| C | 15.29097000 | 7.58908100  | 39.63297500 | H | 32.24983600 | 1.21198600  | 42.22814700 |
| C | 13.88867400 | 7.34641900  | 40.22642800 | H | 31.97115000 | -0.33508400 | 41.39686100 |
| O | 13.30851200 | 8.26888900  | 40.79577500 | H | 32.36967900 | 2.07753700  | 39.99869000 |
| H | 15.64006400 | 5.97473600  | 38.33785500 | H | 30.28739800 | 3.12744300  | 40.78367800 |
| H | 15.86912900 | 8.07542000  | 40.42040100 | H | 29.75486800 | 2.41941700  | 39.24773200 |
| H | 15.20151200 | 8.29348300  | 38.79948800 | N | 27.62273700 | 0.37332800  | 39.44413800 |
| N | 13.37819600 | 6.09446300  | 40.08276900 | C | 26.99354700 | -0.63028200 | 38.59492300 |
| C | 12.18734100 | 5.67769700  | 40.80343800 | C | 25.84797200 | -0.03235300 | 37.76953000 |
| C | 12.47666100 | 4.86901100  | 42.08836300 | O | 24.80371800 | 0.46735700  | 38.61624000 |
| O | 11.95610400 | 5.19567100  | 43.16241600 | C | 25.25013800 | -1.07211100 | 36.82628400 |
| H | 13.85384400 | 5.41605500  | 39.49257800 | H | 26.60674700 | -1.45908600 | 39.20370000 |
| H | 11.63666800 | 6.57116200  | 41.09696400 | H | 24.46917100 | -0.61572500 | 36.20858600 |
| N | 13.29523200 | 3.80648100  | 41.93077600 | H | 26.01796200 | -1.48327000 | 36.15968900 |
| C | 13.38937100 | 2.73477300  | 42.92221000 | H | 27.10392600 | 1.23859800  | 39.62836000 |
| C | 13.84888800 | 3.20277200  | 44.30829600 | H | 26.24777800 | 0.81033500  | 37.18865900 |
| O | 13.42660600 | 2.66508200  | 45.32591200 | H | 24.80492400 | -1.89054700 | 37.39933600 |
| C | 14.35597600 | 1.62816400  | 42.42009100 | H | 25.09146000 | 1.38193200  | 38.88811200 |
| C | 14.21484900 | 1.19279000  | 40.92719000 | C | 24.71958800 | 9.25781000  | 45.71336300 |
| O | 14.19705100 | 2.16170400  | 40.07961300 | S | 22.90780700 | 9.14109100  | 45.48529200 |
| O | 14.19592700 | -0.01989000 | 40.67664100 | H | 24.99523300 | 10.30855900 | 45.56956900 |
| H | 13.57659900 | 3.45484700  | 40.99107000 | H | 25.01626400 | 8.94902500  | 46.71943100 |
| H | 12.39590000 | 2.30053300  | 43.08946500 | C | 22.89778000 | 6.36971900  | 42.59500300 |
| H | 14.23584500 | 0.75543100  | 43.06595200 | H | 23.09567900 | 6.23189800  | 41.53704100 |
| H | 15.38654600 | 1.99024800  | 42.54515800 | C | 25.41665400 | 5.84334100  | 46.69194800 |
| N | 14.80286800 | 4.18600000  | 44.31563700 | H | 26.41003400 | 5.48680900  | 46.94903200 |
| C | 15.33665500 | 4.72283600  | 45.55638100 | C | 21.74956500 | 7.87310800  | 49.13024800 |
| C | 15.04782000 | 6.22977000  | 45.70144000 | H | 21.58961000 | 8.17542500  | 50.16150100 |
| O | 15.84396700 | 6.98154300  | 46.27337000 | C | 18.98471700 | 7.61153800  | 45.17073600 |
| C | 16.82345500 | 4.40585500  | 45.77220400 | H | 17.92808400 | 7.75177400  | 44.96893700 |
| C | 17.19895000 | 4.43337400  | 47.25733800 | C | 23.93872700 | 6.12330100  | 43.48246100 |
| H | 14.78546200 | 4.21651400  | 46.35711400 | C | 25.26570300 | 5.65708000  | 43.09266300 |

|    |             |             |             |                                       |             |             |             |             |
|----|-------------|-------------|-------------|---------------------------------------|-------------|-------------|-------------|-------------|
| C  | 25.93860100 | 5.46094700  | 44.26724200 | H                                     | 22.79879900 | -1.97169600 | 42.27125200 |             |
| C  | 25.06004600 | 5.83287900  | 45.34836100 | H                                     | 24.47350900 | -0.48740100 | 40.28850900 |             |
| C  | 25.75722400 | 5.45601300  | 41.68430600 | H                                     | 24.16830000 | -1.70769300 | 43.73564600 |             |
| H  | 26.80788800 | 5.76978000  | 41.62721100 | H                                     | 26.93973600 | -0.65042300 | 43.93707900 |             |
| H  | 25.21573600 | 6.10247600  | 40.98790500 | H                                     | 24.45106000 | 1.90915900  | 43.36005800 |             |
| C  | 25.64364300 | 4.01313500  | 41.15082300 | H                                     | 23.87176900 | 3.43082500  | 45.28102700 |             |
| H  | 26.40203900 | 3.35772400  | 41.59036600 | H                                     | 22.93538100 | 0.18658300  | 47.84931300 |             |
| H  | 24.67970800 | 3.58204900  | 41.45260400 | H                                     | 23.95279000 | -1.29907000 | 46.16668200 |             |
| C  | 25.69038300 | 3.91024900  | 39.60465200 | H                                     | 21.92903500 | 4.47987800  | 46.88134700 |             |
| O  | 26.03812300 | 2.77355000  | 39.12659300 | H                                     | 22.16992800 | -0.63449000 | 39.61967200 |             |
| O  | 25.34416900 | 4.90913200  | 38.94258500 | H                                     | 20.27110100 | -0.94682800 | 42.84474700 |             |
| C  | 24.62865800 | 6.34661400  | 47.72300700 | H                                     | 22.60579300 | 3.35634100  | 42.10424400 |             |
| C  | 25.05450900 | 6.46610200  | 49.09570800 | H                                     | 22.54566300 | 1.65172600  | 40.28432800 |             |
| C  | 24.03861500 | 7.07626800  | 49.77081900 | H                                     | 21.43513100 | 4.54716300  | 45.43225300 |             |
| C  | 22.98352200 | 7.31311600  | 48.81639900 | H                                     | 20.16020000 | -1.56345400 | 39.80700900 |             |
| C  | 20.67976100 | 8.00850300  | 48.25391300 | H                                     | 21.36990100 | -3.62525300 | 42.34489300 |             |
| C  | 19.34796800 | 8.42012100  | 48.64356700 | H                                     | 20.71926700 | -5.87393300 | 43.15027600 |             |
| C  | 18.55625100 | 8.29454800  | 47.54406300 | H                                     | 23.57347200 | -7.66128300 | 40.47743300 |             |
| C  | 19.41513100 | 7.84066200  | 46.47314400 | H                                     | 24.22597500 | -5.39359500 | 39.67350700 |             |
| C  | 19.81236300 | 7.23322100  | 44.12096900 | H                                     | 22.20046300 | -8.80680600 | 41.89213700 |             |
| C  | 19.38247500 | 7.09901100  | 42.74817600 | H                                     | 25.25503400 | 8.64942500  | 44.97951200 |             |
| C  | 20.49644600 | 6.80704100  | 42.02206100 | H                                     | 12.95164700 | 9.80999500  | 44.29702900 |             |
| C  | 21.59980700 | 6.72441400  | 42.95134600 | H                                     | 15.47770400 | 9.60881800  | 44.34575800 |             |
| N  | 23.84071800 | 6.23090600  | 44.85111200 | H                                     | 30.79180500 | -1.95707400 | 45.56999200 |             |
| N  | 23.36188400 | 6.85837300  | 47.57613300 | H                                     | 31.05831300 | -1.64695500 | 43.22877500 |             |
| N  | 20.69808900 | 7.67412400  | 46.92514400 | H                                     | 25.48831900 | -3.12796800 | 44.69861900 |             |
| N  | 21.16058800 | 6.98056900  | 44.22534900 | H                                     | 20.57634200 | 6.63196300  | 40.95665500 |             |
| Fe | 22.28956400 | 7.02815100  | 45.88144400 | H                                     | 18.36069900 | 7.18844800  | 42.40240800 |             |
| O  | 21.43024400 | 5.05878500  | 46.26466600 | H                                     | 17.48926900 | 8.43673500  | 47.43877700 |             |
| C  | 23.05467300 | -1.73602100 | 41.23761100 | H                                     | 19.06600000 | 8.71974400  | 49.64576400 |             |
| N  | 24.22702100 | -0.87669300 | 41.21158100 | H                                     | 23.98825300 | 7.33623700  | 50.82132800 |             |
| C  | 24.96029300 | -0.32607500 | 42.22253700 | H                                     | 26.01099300 | 6.12838600  | 49.47588900 |             |
| O  | 25.79232000 | 0.54964500  | 42.00171300 | H                                     | 26.95852200 | 5.11647300  | 44.39451400 |             |
| C  | 24.81974500 | -0.82760900 | 43.67958600 | H                                     | 27.75503200 | -1.05374900 | 37.92827500 |             |
| N  | 26.13716400 | -1.26023600 | 44.13475800 | H                                     | 25.13422800 | 5.72750200  | 36.89475200 |             |
| C  | 26.39651000 | -2.49081600 | 44.63562100 | H                                     | 16.71293600 | 3.46436900  | 35.56424700 |             |
| O  | 27.48984800 | -2.90158000 | 45.00588700 | H                                     | 11.56175600 | 5.06875200  | 40.13870200 |             |
| C  | 24.22274800 | 0.22902500  | 44.61730900 |                                       |             |             |             |             |
| C  | 24.07115500 | 1.52837500  | 44.29855900 | <b><sup>2</sup>TS1<sub>HA,B</sub></b> | C           | 24.97697000 | 5.76605100  | 35.63542200 |
| C  | 23.32302000 | 2.48942300  | 45.18138600 |                                       | S           | 24.16881000 | 4.32750900  | 34.83784200 |
| C  | 23.01512800 | 1.97413700  | 46.60059800 |                                       | C           | 25.28423300 | 3.00411700  | 35.43861500 |
| C  | 23.23770200 | 0.55422000  | 46.87388500 |                                       | H           | 24.31769300 | 6.62898000  | 35.50108400 |
| C  | 23.79379000 | -0.24678300 | 45.93830500 |                                       | H           | 25.39491800 | 3.05125200  | 36.52823600 |
| O  | 22.59038400 | 2.74891900  | 47.45414100 |                                       | H           | 24.83975300 | 2.04733000  | 35.14981000 |
| C  | 21.83165100 | -0.98600400 | 40.60131900 |                                       | H           | 26.26576500 | 3.09307900  | 34.96154600 |
| C  | 21.48969000 | 0.19852500  | 41.48217200 |                                       | H           | 25.93489900 | 5.97767100  | 35.14867900 |
| C  | 20.79531800 | -0.01107800 | 42.68043300 |                                       | H           | 21.08023700 | 2.01637900  | 34.71243500 |
| C  | 20.84712400 | 0.94344900  | 43.69326500 |                                       | C           | 20.68890100 | 1.69112800  | 35.68441900 |
| C  | 21.61338400 | 2.10488700  | 43.51619100 |                                       | C           | 20.05692900 | 2.86674700  | 36.41500400 |
| C  | 22.09541900 | 2.40920600  | 42.24356100 |                                       | O           | 19.04942200 | 2.70940400  | 37.12126100 |
| C  | 22.05143400 | 1.45382300  | 41.23107900 |                                       | C           | 21.83266500 | 1.03687400  | 36.49012500 |
| O  | 22.01420200 | 2.88272600  | 44.58737200 |                                       | C           | 21.44630000 | 0.56461300  | 37.89412300 |
| Cl | 20.04698800 | 0.63561000  | 45.21968700 |                                       | C           | 20.45483800 | -0.59112500 | 37.88819400 |
| C  | 23.34374400 | -3.03776900 | 40.44972600 |                                       | H           | 22.36184700 | 0.24400500  | 38.40845500 |
| O  | 24.00167100 | -2.97041600 | 39.42160800 |                                       | H           | 19.90056300 | 0.95593100  | 35.50890700 |
| C  | 22.87857800 | -4.35181800 | 40.97438900 |                                       | H           | 21.03590800 | 1.38956600  | 38.48943600 |
| O  | 20.78398400 | -1.92802100 | 40.47046900 |                                       | H           | 22.66817700 | 1.73916700  | 36.58646800 |
| C  | 21.88452200 | -4.49694200 | 41.95787600 |                                       | H           | 22.19572400 | 0.17640600  | 35.91793400 |
| C  | 21.49788200 | -5.75544700 | 42.40367900 |                                       | H           | 19.85972200 | -0.17150600 | 39.83123100 |
| C  | 22.11139600 | -6.89720000 | 41.87539900 |                                       | O           | 20.18449200 | -1.25416900 | 36.90046500 |
| C  | 23.09973800 | -6.77128400 | 40.88941400 |                                       | N           | 19.90916200 | -0.90814400 | 39.13399900 |
| C  | 23.46907200 | -5.50989300 | 40.44216700 |                                       | H           | 19.07301200 | -1.48083600 | 39.07547500 |
| O  | 21.70765500 | -8.11034600 | 42.35392200 |                                       | N           | 20.68287900 | 4.05877600  | 36.26072400 |

|   |             |             |             |   |             |             |             |
|---|-------------|-------------|-------------|---|-------------|-------------|-------------|
| C | 20.29641800 | 5.28117300  | 36.95693100 | N | 13.65088600 | 4.61736800  | 43.48466000 |
| H | 19.88079200 | 5.99579000  | 36.23158900 | C | 14.42716200 | 4.73045100  | 44.71053400 |
| C | 21.47400500 | 5.92146100  | 37.70376300 | C | 14.76782200 | 6.19057700  | 45.07632300 |
| H | 21.12898700 | 6.87893100  | 38.11802400 | O | 15.73897800 | 6.44902000  | 45.79838500 |
| C | 22.05908100 | 5.04108500  | 38.80991800 | C | 15.68431600 | 3.84928400  | 44.69315300 |
| H | 19.49329800 | 5.01058600  | 37.64732300 | C | 16.14536900 | 3.47415500  | 46.10486600 |
| H | 22.32987000 | 4.05356300  | 38.42245600 | H | 13.77897300 | 4.35995100  | 45.51269700 |
| H | 22.26274400 | 6.16807900  | 36.98128300 | H | 14.08784100 | 4.87863800  | 42.60837800 |
| H | 21.56578700 | 4.07584700  | 35.75367300 | H | 16.49054500 | 4.31868800  | 44.12093300 |
| H | 22.98022100 | 5.47600800  | 39.20741500 | H | 15.42690600 | 2.91162000  | 44.18329900 |
| H | 21.34199300 | 4.89684300  | 39.62766500 | O | 15.37759500 | 3.43941900  | 47.06197700 |
| C | 15.47664100 | 3.04425900  | 36.78817800 | N | 17.45586000 | 3.12463400  | 46.20735600 |
| C | 15.59334600 | 3.69433500  | 38.15548500 | H | 17.78060100 | 2.79389200  | 47.10482500 |
| O | 14.63561900 | 4.25021100  | 38.70634100 | H | 18.09968600 | 3.05929500  | 45.42736700 |
| C | 14.72129200 | 1.69113900  | 36.85695700 | N | 13.90948300 | 7.12801000  | 44.61485100 |
| C | 13.26594500 | 1.74924600  | 37.36292600 | C | 14.01705000 | 8.54087100  | 44.94901400 |
| C | 12.33949000 | 2.55006700  | 36.43781000 | H | 13.05903000 | 8.86782400  | 45.37660600 |
| C | 12.71171900 | 0.33318100  | 37.58383000 | C | 14.36817900 | 9.42340000  | 43.74206200 |
| H | 13.36952000 | -0.25587700 | 38.23686800 | C | 15.78298300 | 9.19058700  | 43.20567200 |
| H | 11.72810300 | 0.38324500  | 38.06288900 | H | 14.78028200 | 8.62282200  | 45.72788800 |
| H | 12.61403700 | -0.21196100 | 36.63319800 | H | 13.63924800 | 9.23984100  | 42.94354500 |
| H | 12.23626000 | 2.06450400  | 35.45557200 | H | 15.91634200 | 8.14179000  | 42.91845000 |
| H | 11.35451500 | 2.63873100  | 36.90486400 | H | 15.96107500 | 9.80539900  | 42.31699900 |
| H | 12.70925300 | 3.56959200  | 36.27881700 | H | 13.18706600 | 6.86251500  | 43.94880600 |
| H | 14.93538300 | 3.73986100  | 36.13850700 | N | 31.76571200 | 0.35567200  | 44.42278400 |
| H | 13.25476700 | 2.26162200  | 38.32938700 | C | 31.92920000 | 0.55921300  | 42.99133000 |
| H | 15.30029500 | 1.01056400  | 37.49757700 | C | 30.63762400 | 1.10411500  | 42.38099600 |
| H | 14.74305400 | 1.25016400  | 35.84910000 | O | 29.56688400 | 1.01231400  | 42.97980000 |
| N | 16.80943600 | 3.61505900  | 38.77150600 | H | 30.85404200 | -0.07190000 | 44.60243400 |
| C | 16.93431700 | 3.91706400  | 40.19502100 | H | 32.75758900 | 1.25754500  | 42.80394300 |
| C | 16.69070600 | 5.39587300  | 40.54591000 | N | 30.72541500 | 1.66338200  | 41.14244300 |
| O | 16.41930800 | 5.72224300  | 41.70203000 | C | 29.52602300 | 1.93789100  | 40.35107300 |
| C | 18.29598100 | 3.45322300  | 40.72553800 | C | 29.02010200 | 0.63176100  | 39.68638600 |
| H | 17.59968700 | 3.19818400  | 38.27823500 | O | 29.72915000 | -0.37544200 | 39.63839100 |
| H | 16.14026000 | 3.38801800  | 40.73478000 | C | 30.05831300 | 2.92463800  | 39.29518900 |
| H | 19.11815300 | 3.93444300  | 40.18555900 | C | 31.45525400 | 2.35344700  | 38.98658700 |
| H | 18.39065500 | 3.69768000  | 41.78590200 | C | 31.94892000 | 1.79980700  | 40.34281200 |
| H | 18.39608100 | 2.36900500  | 40.60910000 | H | 31.36850800 | 1.53323200  | 38.26780500 |
| N | 16.81629600 | 6.29336500  | 39.53128300 | H | 28.74446500 | 2.35488900  | 40.98874900 |
| C | 16.44704400 | 7.68913000  | 39.68669200 | H | 32.64582000 | 2.49416700  | 40.83188200 |
| C | 14.94285400 | 8.02518700  | 39.77170100 | H | 32.45563800 | 0.83583900  | 40.22047600 |
| O | 14.61909400 | 9.19643900  | 39.95784500 | H | 32.14225700 | 3.09812100  | 38.57137900 |
| H | 16.91691100 | 5.91029500  | 38.60142400 | H | 30.13465300 | 3.92612500  | 39.73529400 |
| H | 16.88807500 | 8.07485800  | 40.60862800 | H | 29.40846900 | 2.98598500  | 38.41857100 |
| H | 16.87094300 | 8.26108100  | 38.85624400 | N | 27.80061700 | 0.72024100  | 39.11198100 |
| N | 14.07864400 | 6.99198400  | 39.63211000 | C | 27.15195900 | -0.47424900 | 38.58600300 |
| C | 12.65190600 | 7.13724500  | 39.88507400 | C | 25.78830000 | -0.15580200 | 37.96093200 |
| C | 12.24866200 | 6.42344400  | 41.18898600 | O | 24.87565600 | 0.38326700  | 38.92808500 |
| O | 12.05136900 | 7.05327700  | 42.23478300 | C | 25.15976400 | -1.41264400 | 37.36562200 |
| H | 14.42022700 | 6.05003200  | 39.44900200 | H | 27.02053300 | -1.21827900 | 39.38307400 |
| H | 12.44006000 | 8.20080000  | 39.99292500 | H | 24.20268600 | -1.17039200 | 36.89159700 |
| N | 12.19643900 | 5.07404600  | 41.08993800 | H | 25.81649300 | -1.85498300 | 36.60706000 |
| C | 11.60799500 | 4.24096900  | 42.13858600 | H | 27.21022700 | 1.53667700  | 39.28937500 |
| C | 12.31658700 | 4.31702400  | 43.50000900 | H | 25.93406700 | 0.59552400  | 37.17180400 |
| O | 11.69558500 | 4.05211000  | 44.52429200 | H | 24.98216300 | -2.15555300 | 38.14980700 |
| C | 11.58668700 | 2.76724600  | 41.67193200 | H | 25.10570200 | 1.34893900  | 39.04050300 |
| C | 10.91555200 | 2.50380200  | 40.29018200 | C | 23.24658100 | 8.84654300  | 44.94976100 |
| O | 11.06863700 | 3.36780700  | 39.38059200 | S | 22.46836300 | 8.09750400  | 46.42408200 |
| O | 10.32107600 | 1.40355900  | 40.18382200 | H | 23.27915300 | 9.92833500  | 45.12174500 |
| H | 12.05017400 | 4.63424400  | 40.16356800 | H | 24.26508800 | 8.48080400  | 44.79499100 |
| H | 10.58177200 | 4.57138100  | 42.34256300 | C | 22.84934200 | 5.96447400  | 42.68762900 |
| H | 11.09205400 | 2.16750800  | 42.43891800 | H | 23.02206700 | 5.97810700  | 41.61714200 |
| H | 12.62227200 | 2.40666400  | 41.59374700 | C | 25.59356400 | 5.45038600  | 46.63281900 |





|   |             |             |             |   |             |             |             |
|---|-------------|-------------|-------------|---|-------------|-------------|-------------|
| H | 22.66685000 | 1.74377600  | 36.53227800 | C | 11.05246100 | 2.40950900  | 40.27748800 |
| H | 22.19072300 | 0.17454900  | 35.88086000 | O | 11.18428400 | 3.33463800  | 39.41459400 |
| H | 19.82852800 | -0.11535800 | 39.78111100 | O | 10.52924300 | 1.28909200  | 40.11135000 |
| O | 20.18837000 | -1.24982900 | 36.87588100 | H | 12.05186600 | 4.56597500  | 40.23345400 |
| N | 19.89105700 | -0.86715700 | 39.10128800 | H | 10.62887800 | 4.40922000  | 42.41763300 |
| H | 19.05502100 | -1.44036200 | 39.04247300 | H | 11.19087100 | 2.02269500  | 42.42186400 |
| N | 20.68836600 | 4.06608300  | 36.17997000 | H | 12.73372800 | 2.32642500  | 41.62499200 |
| C | 20.30026500 | 5.29622800  | 36.86176300 | N | 13.70641100 | 4.51234800  | 43.54222600 |
| H | 19.88905400 | 6.00380300  | 36.12716700 | C | 14.48150800 | 4.62616400  | 44.76731800 |
| C | 21.47540700 | 5.94317800  | 37.60680400 | C | 14.80778500 | 6.08700400  | 45.14141800 |
| H | 21.13052900 | 6.90686000  | 38.00638100 | O | 15.78772800 | 6.35402300  | 45.85016400 |
| C | 22.05111700 | 5.07636800  | 38.72867300 | C | 15.74741600 | 3.75733900  | 44.75191300 |
| H | 19.49325700 | 5.03450800  | 37.55094200 | C | 16.21333900 | 3.39494000  | 46.16505600 |
| H | 22.32209200 | 4.08333900  | 38.35560100 | H | 13.83473100 | 4.24497000  | 45.56583400 |
| H | 22.26927500 | 6.17802900  | 36.88572300 | H | 14.13049500 | 4.80147600  | 42.66843600 |
| H | 21.57073800 | 4.07725900  | 35.67226200 | H | 16.54828500 | 4.23030200  | 44.17463400 |
| H | 22.96985400 | 5.51497700  | 39.12811000 | H | 15.49650200 | 2.81440600  | 44.24884200 |
| H | 21.32772000 | 4.94461700  | 39.54297100 | O | 15.44094700 | 3.32901300  | 47.11654900 |
| C | 15.47824300 | 3.15980100  | 36.65513400 | N | 17.53688400 | 3.09693900  | 46.27996900 |
| C | 15.58834800 | 3.79976300  | 38.02734800 | H | 17.85337500 | 2.74659700  | 47.17312800 |
| O | 14.63204000 | 4.36570400  | 38.56713500 | H | 18.18003500 | 3.02040800  | 45.50005000 |
| C | 14.73742900 | 1.79743700  | 36.71838900 | N | 13.92834800 | 7.01492600  | 44.70305600 |
| C | 13.29794500 | 1.82975400  | 37.26997500 | C | 14.01895600 | 8.42527400  | 45.05170600 |
| C | 12.33856300 | 2.66086700  | 36.40760700 | H | 13.05168200 | 8.73801800  | 45.46861000 |
| C | 12.75429400 | 0.40482200  | 37.45777800 | C | 14.37793800 | 9.32459900  | 43.85951500 |
| H | 13.44338000 | -0.20992100 | 38.05285100 | C | 15.80049400 | 9.10887100  | 43.33684300 |
| H | 11.79717000 | 0.43768600  | 37.98934000 | H | 14.77081700 | 8.50731100  | 45.84169600 |
| H | 12.61092400 | -0.10023100 | 36.49050200 | H | 13.66015000 | 9.14642000  | 43.05005400 |
| H | 12.20292400 | 2.21315400  | 35.41105500 | H | 15.94261900 | 8.06713900  | 43.02883900 |
| H | 11.37210300 | 2.72565700  | 36.91531900 | H | 15.98596700 | 9.74370000  | 42.46387100 |
| H | 12.69911200 | 3.68775800  | 36.27794600 | H | 13.20117800 | 6.74619600  | 44.04207100 |
| H | 14.92701100 | 3.85367900  | 36.01238400 | N | 31.66893300 | 0.40086300  | 44.54703500 |
| H | 13.31147700 | 2.30597300  | 38.25470200 | C | 31.83714800 | 0.61087800  | 43.11699500 |
| H | 15.34199600 | 1.10992800  | 37.32737300 | C | 30.53596200 | 1.12401500  | 42.49996400 |
| H | 14.73437300 | 1.37805500  | 35.70092100 | O | 29.46598700 | 1.01000700  | 43.09751300 |
| N | 16.79577600 | 3.69607700  | 38.66099600 | H | 30.75854900 | -0.03173400 | 44.71907700 |
| C | 16.89998100 | 3.94084000  | 40.09747000 | H | 32.64868900 | 1.33018900  | 42.93516300 |
| C | 16.67648900 | 5.40611200  | 40.51335800 | N | 30.61404700 | 1.68151000  | 41.26168300 |
| O | 16.44591000 | 5.68301800  | 41.69150600 | C | 29.41082000 | 1.93102900  | 40.46839800 |
| C | 18.24450700 | 3.43213800  | 40.63118500 | C | 28.93236000 | 0.61274800  | 39.80524900 |
| H | 17.58138800 | 3.26276300  | 38.17541600 | O | 29.63785500 | -0.39796300 | 39.80687900 |
| H | 16.08826000 | 3.40317500  | 40.60219800 | C | 29.92364900 | 2.93033100  | 39.41504000 |
| H | 19.08382000 | 3.92287000  | 40.12690800 | C | 31.33187900 | 2.38715900  | 39.10724200 |
| H | 18.32188300 | 3.63134800  | 41.70220500 | C | 31.83583000 | 1.84373600  | 40.46386000 |
| H | 18.33003800 | 2.35228200  | 40.46980200 | H | 31.26225800 | 1.56575400  | 38.38761900 |
| N | 16.76698800 | 6.34463000  | 39.53330500 | H | 28.61884800 | 2.32881100  | 41.10550700 |
| C | 16.37980600 | 7.72692900  | 39.75560800 | H | 32.51668300 | 2.55274400  | 40.95419200 |
| C | 14.87254800 | 8.03494600  | 39.89187100 | H | 32.36322400 | 0.89064900  | 40.34323300 |
| O | 14.53876700 | 9.19202300  | 40.14182000 | H | 32.00422200 | 3.14496000  | 38.69218100 |
| H | 16.82540200 | 5.99808100  | 38.58582100 | H | 29.98027400 | 3.93199000  | 39.85762100 |
| H | 16.83763300 | 8.07999100  | 40.68218300 | H | 29.27378400 | 2.98213000  | 38.53797400 |
| H | 16.77514300 | 8.33954500  | 38.94006300 | N | 27.73654700 | 0.69281900  | 39.18366300 |
| N | 14.02114600 | 6.99678200  | 39.72439100 | C | 27.11833000 | -0.49438200 | 38.60643000 |
| C | 12.59774200 | 7.10316900  | 40.01630400 | C | 25.76605400 | -0.16405600 | 37.96296500 |
| C | 12.23860400 | 6.34234300  | 41.30732700 | O | 24.85002000 | 0.37863300  | 38.92661700 |
| O | 12.04493500 | 6.94480200  | 42.37198300 | C | 25.13676000 | -1.40818700 | 37.34355900 |
| H | 14.37149000 | 6.07329300  | 39.47565300 | H | 26.97706200 | -1.26263300 | 39.37777700 |
| H | 12.36539600 | 8.15806500  | 40.16052800 | H | 24.19112700 | -1.15159800 | 36.85458300 |
| N | 12.21839100 | 4.99807400  | 41.17076100 | H | 25.80350800 | -1.84776200 | 36.59195400 |
| C | 11.66469700 | 4.11839700  | 42.20109300 | H | 27.15589000 | 1.53021200  | 39.28089500 |
| C | 12.37629100 | 4.18446300  | 43.55858600 | H | 25.92728000 | 0.59543100  | 37.18535600 |
| O | 11.77097100 | 3.88980900  | 44.58455900 | H | 24.93922900 | -2.15812000 | 38.11551700 |
| C | 11.68722400 | 2.65921300  | 41.68611000 | H | 25.06544400 | 1.35279500  | 39.00212100 |



|   |             |             |             |   |             |             |             |
|---|-------------|-------------|-------------|---|-------------|-------------|-------------|
| O | 19.00306100 | 3.86935100  | 37.37524600 | H | 14.71597900 | 5.37412000  | 39.35116900 |
| C | 21.47195900 | 1.76344000  | 36.55644600 | H | 12.73133800 | 7.58550600  | 39.29972100 |
| C | 21.12864600 | 1.28513500  | 37.97067700 | N | 12.33883600 | 4.74876100  | 40.96502200 |
| C | 19.97313400 | 0.29052000  | 38.02114900 | C | 11.72650800 | 4.14205100  | 42.14458200 |
| H | 22.02381500 | 0.82534800  | 38.40906200 | C | 12.46998100 | 4.39789900  | 43.46553300 |
| H | 19.48465600 | 1.99253700  | 35.72922400 | O | 11.85935100 | 4.33386300  | 44.52807000 |
| H | 20.88448700 | 2.13423500  | 38.62258400 | C | 11.60796500 | 2.61561700  | 41.92912500 |
| H | 22.40287500 | 2.33965200  | 36.61173200 | C | 10.89079500 | 2.17038300  | 40.61908400 |
| H | 21.67370100 | 0.88861100  | 35.92792500 | O | 11.09930500 | 2.84344700  | 39.56928700 |
| H | 19.93676100 | 0.36917700  | 40.09812000 | O | 10.20326100 | 1.12374300  | 40.71106900 |
| O | 19.37372900 | -0.10983800 | 37.03400400 | H | 12.18043100 | 4.15770600  | 40.13114400 |
| N | 19.65827900 | -0.18151700 | 39.29028400 | H | 10.72687400 | 4.56593100  | 42.30400000 |
| H | 18.73273400 | -0.59210300 | 39.36033100 | H | 11.09778000 | 2.18190300  | 42.79186500 |
| N | 20.76980800 | 4.94144400  | 36.41086800 | H | 12.61942300 | 2.18655000  | 41.89434500 |
| C | 20.61394400 | 6.20360900  | 37.12837600 | N | 13.81531500 | 4.62873600  | 43.38302100 |
| H | 20.27738100 | 6.98022200  | 36.42702500 | C | 14.62099800 | 4.90137200  | 44.56441200 |
| C | 21.91091000 | 6.64357200  | 37.81921000 | C | 14.95438100 | 6.39763100  | 44.74329900 |
| H | 21.72393600 | 7.61967200  | 38.28760000 | O | 15.88657100 | 6.74835900  | 45.47921900 |
| C | 22.42292000 | 5.64335700  | 38.85670300 | C | 15.88541500 | 4.02960000  | 44.62320600 |
| H | 19.81744400 | 6.05228300  | 37.86086200 | C | 16.34774600 | 3.76533600  | 46.06201800 |
| H | 22.59610900 | 4.66177200  | 38.40404000 | H | 13.99781700 | 4.63207800  | 45.42464500 |
| H | 22.68661000 | 6.81068900  | 37.06080500 | H | 14.24506900 | 4.71542300  | 42.46906100 |
| H | 21.61376300 | 4.82910500  | 35.85377200 | H | 16.69177400 | 4.45659200  | 44.01887400 |
| H | 23.38396000 | 5.96407400  | 39.26763800 | H | 15.63790500 | 3.05279900  | 44.18684800 |
| H | 21.70118100 | 5.51258300  | 39.67229700 | O | 15.59204800 | 3.86165700  | 47.02471100 |
| C | 15.66444300 | 2.04397600  | 37.50321800 | N | 17.63871500 | 3.36095600  | 46.18579100 |
| C | 15.83963300 | 2.80318700  | 38.80856800 | H | 17.94832200 | 3.10713700  | 47.11336800 |
| O | 14.89697900 | 3.33390400  | 39.40782400 | H | 18.29547800 | 3.20702300  | 45.42370700 |
| C | 14.87453200 | 0.72410200  | 37.68718800 | N | 14.13663800 | 7.26834200  | 44.11158200 |
| C | 13.38844500 | 0.88241100  | 38.06708500 | C | 14.23884500 | 8.71255500  | 44.26082200 |
| C | 12.54362000 | 1.47118400  | 36.92831900 | H | 13.30815700 | 9.08560000  | 44.71270300 |
| C | 12.79593000 | -0.45665300 | 38.53177400 | C | 14.48420000 | 9.43510700  | 42.92783200 |
| H | 13.38511700 | -0.88958100 | 39.35107200 | C | 15.86501700 | 9.16054200  | 42.32561000 |
| H | 11.77391600 | -0.31283200 | 38.89887600 | H | 15.05155300 | 8.89928900  | 44.96843000 |
| H | 12.77550100 | -1.19147100 | 37.71293000 | H | 13.70790600 | 9.13129500  | 42.21523700 |
| H | 12.47873400 | 0.77532400  | 36.07819300 | H | 16.01575600 | 8.08525000  | 42.18222600 |
| H | 11.53732700 | 1.68552900  | 37.29998600 | H | 15.96211400 | 9.64233500  | 41.34643800 |
| H | 12.95681400 | 2.41735000  | 36.55715200 | H | 13.43399900 | 6.91935000  | 43.46263100 |
| H | 15.12987000 | 2.70322300  | 36.80991000 | N | 31.55831800 | -0.02455500 | 44.37780600 |
| H | 13.32115900 | 1.58348000  | 38.90370000 | C | 31.72715500 | 0.21464100  | 42.95228100 |
| H | 15.38583500 | 0.12389600  | 38.45391500 | C | 30.45526200 | 0.82598300  | 42.36384500 |
| H | 14.95709700 | 0.15209900  | 36.75088800 | O | 29.38403100 | 0.75338800  | 42.96550900 |
| N | 17.10709900 | 2.84143500  | 39.31705700 | H | 30.62022900 | -0.39369200 | 44.54886400 |
| C | 17.36634600 | 3.54918700  | 40.56696800 | H | 32.58055700 | 0.88653200  | 42.78176700 |
| C | 17.00056600 | 5.04358100  | 40.51902600 | N | 30.55976300 | 1.42308800  | 41.14646800 |
| O | 16.64177700 | 5.63677000  | 41.53762000 | C | 29.37041500 | 1.79517100  | 40.38040300 |
| C | 18.82466900 | 3.36434700  | 40.99715800 | C | 28.79223800 | 0.55144800  | 39.65702400 |
| H | 17.88136900 | 2.72125200  | 38.66965700 | O | 29.43286000 | -0.49858200 | 39.57487400 |
| H | 16.70481000 | 3.13359000  | 41.33197600 | C | 29.94404600 | 2.80638800  | 39.37005600 |
| H | 19.50952300 | 3.75969500  | 40.23835200 | C | 31.30864700 | 2.18264100  | 39.02135300 |
| H | 19.01414700 | 3.88196900  | 41.94043800 | C | 31.78480100 | 1.54481400  | 40.34634600 |
| H | 19.04111200 | 2.30331300  | 41.15229700 | H | 31.17694000 | 1.40161900  | 38.26644000 |
| N | 17.11124100 | 5.65322500  | 39.30775500 | H | 28.61490200 | 2.21767600  | 41.04513600 |
| C | 16.72670800 | 7.03860100  | 39.11263400 | H | 32.51250900 | 2.18554400  | 40.86271300 |
| C | 15.21858800 | 7.36283500  | 39.09792100 | H | 32.24946000 | 0.56688200  | 40.17673900 |
| O | 14.87984500 | 8.53687900  | 38.96008600 | H | 32.02835200 | 2.91108000  | 38.63393600 |
| H | 17.48425200 | 5.12130900  | 38.52782300 | H | 30.07341700 | 3.77930100  | 39.85876600 |
| H | 17.14937700 | 7.65927100  | 39.90808600 | H | 29.29206300 | 2.94467900  | 38.50409100 |
| H | 17.14490000 | 7.38688800  | 38.16406400 | N | 27.58794600 | 0.74576900  | 39.07944900 |
| N | 14.36241900 | 6.32130700  | 39.23503500 | C | 26.87742200 | -0.35588800 | 38.44262800 |
| C | 12.93022800 | 6.51998900  | 39.41472900 | C | 25.53746600 | 0.10821800  | 37.85660500 |
| C | 12.48463600 | 6.08431400  | 40.82243900 | O | 24.67841400 | 0.64302900  | 38.87472500 |
| O | 12.33490100 | 6.90413900  | 41.73759200 | C | 24.81166400 | -1.04541400 | 37.17075600 |



|   |             |             |             |   |             |             |             |
|---|-------------|-------------|-------------|---|-------------|-------------|-------------|
| H | 25.41601100 | 3.24113400  | 36.58567600 | H | 17.26239900 | 5.24355100  | 38.50010000 |
| H | 24.72495000 | 2.34623100  | 35.19336500 | H | 17.06838800 | 7.72275300  | 40.04506600 |
| H | 26.26140900 | 3.22207100  | 35.00441500 | H | 17.05178300 | 7.56269400  | 38.28802100 |
| H | 26.27853000 | 6.11075100  | 35.27668200 | N | 14.25643900 | 6.47969000  | 39.33450000 |
| H | 20.76486800 | 2.69966100  | 34.78828700 | C | 12.82983500 | 6.69119400  | 39.54274100 |
| C | 20.42862600 | 2.42823600  | 35.79704200 | C | 12.39441800 | 6.18378000  | 40.92949800 |
| C | 19.98925600 | 3.68465600  | 36.53790100 | O | 12.23884000 | 6.95637100  | 41.88309600 |
| O | 18.98092100 | 3.69639700  | 37.26465300 | H | 14.59429900 | 5.52166200  | 39.39557000 |
| C | 21.56599800 | 1.66063600  | 36.50563300 | H | 12.64624000 | 7.76414200  | 39.48920300 |
| C | 21.22555600 | 1.13382300  | 37.90293700 | N | 12.26449200 | 4.84045800  | 41.00849400 |
| C | 20.18374800 | 0.01975300  | 37.88687800 | C | 11.66166200 | 4.17324200  | 42.16043500 |
| H | 22.14703300 | 0.75236800  | 38.36321500 | C | 12.40705800 | 4.37678400  | 43.48967600 |
| H | 19.55604400 | 1.77932700  | 35.69825100 | O | 11.80000200 | 4.26135600  | 44.54969700 |
| H | 20.87641900 | 1.94289600  | 38.55743800 | C | 11.56091900 | 2.65670000  | 41.87755300 |
| H | 22.45049800 | 2.30266600  | 36.58664600 | C | 10.84238400 | 2.26010900  | 40.55378300 |
| H | 21.84030100 | 0.81108400  | 35.87085800 | O | 11.02323100 | 2.98726800  | 39.53634100 |
| H | 19.83790900 | 0.23711400  | 39.92276700 | O | 10.18225500 | 1.19259200  | 40.59944700 |
| O | 19.77705300 | -0.51688200 | 36.86872500 | H | 12.10909300 | 4.28985300  | 40.14798100 |
| N | 19.74985000 | -0.40572200 | 39.14158500 | H | 10.65797300 | 4.57793500  | 42.34142000 |
| H | 18.87489200 | -0.91979200 | 39.11868000 | H | 11.06202500 | 2.17864900  | 42.72321600 |
| N | 20.77179000 | 4.77444900  | 36.35834400 | H | 12.57731600 | 2.24242800  | 41.81866100 |
| C | 20.58076900 | 6.03773500  | 37.06603700 | N | 13.75057500 | 4.61826800  | 43.41233200 |
| H | 20.25277100 | 6.80680600  | 36.35229100 | C | 14.56214600 | 4.84308400  | 44.59990300 |
| C | 21.85362000 | 6.49879600  | 37.78752800 | C | 14.91692400 | 6.32852500  | 44.82320000 |
| H | 21.64100500 | 7.47414400  | 38.24632800 | O | 15.87270100 | 6.64254700  | 45.54302200 |
| C | 22.35580100 | 5.51263700  | 38.84329200 | C | 15.81648200 | 3.95632200  | 44.62817800 |
| H | 19.76665000 | 5.87944400  | 37.77752800 | C | 16.29146100 | 3.66803000  | 46.05647000 |
| H | 22.55097400 | 4.52972600  | 38.40218500 | H | 13.93738800 | 4.55368900  | 45.45230300 |
| H | 22.64540500 | 6.67431400  | 37.04791400 | H | 14.17491100 | 4.74582900  | 42.50090100 |
| H | 21.63372700 | 4.66938100  | 35.82767400 | H | 16.61983100 | 4.38458300  | 44.02069700 |
| H | 23.30394700 | 5.84992300  | 39.27065100 | H | 15.55115200 | 2.98898800  | 44.18118200 |
| H | 21.62022400 | 5.38063200  | 39.64627600 | O | 15.54182100 | 3.73821600  | 47.02720400 |
| C | 15.46681100 | 2.31122600  | 37.30897100 | N | 17.58515300 | 3.26590600  | 46.16236400 |
| C | 15.67060400 | 2.98806400  | 38.65459900 | H | 17.91315500 | 3.01722400  | 47.08488000 |
| O | 14.74446800 | 3.50801300  | 39.28843500 | H | 18.23344800 | 3.14526100  | 45.38844600 |
| C | 14.70864800 | 0.96616200  | 37.43633800 | N | 14.08903000 | 7.22898400  | 44.24647400 |
| C | 13.23348900 | 1.07896100  | 37.87207600 | C | 14.21241000 | 8.66587100  | 44.44255200 |
| C | 12.34136800 | 1.70079100  | 36.78821300 | H | 13.28863500 | 9.03651600  | 44.91001700 |
| C | 12.67896900 | -0.28876200 | 38.29830200 | C | 14.46414800 | 9.42955500  | 43.13382100 |
| H | 13.30334500 | -0.74636300 | 39.07706700 | C | 15.83689800 | 9.15130800  | 42.51520100 |
| H | 11.66909500 | -0.17699400 | 38.70719000 | H | 15.03041900 | 8.81722400  | 45.15245400 |
| H | 12.64019500 | -0.98815100 | 37.44968800 | H | 13.67849300 | 9.16494900  | 42.41567500 |
| H | 12.25516700 | 1.03819600  | 35.91388600 | H | 15.96716200 | 8.07921900  | 42.33240300 |
| H | 11.34663300 | 1.88689800  | 37.20308600 | H | 15.93884800 | 9.66762200  | 41.55430000 |
| H | 12.72907500 | 2.66658500  | 36.44127000 | H | 13.36751000 | 6.91003900  | 43.60345000 |
| H | 14.89356900 | 3.00154900  | 36.68037300 | N | 31.62476200 | -0.00294500 | 44.39035900 |
| H | 13.18170400 | 1.74301200  | 38.73950100 | C | 31.79096100 | 0.23535900  | 42.96443300 |
| H | 15.25430500 | 0.33207900  | 38.15012100 | C | 30.51231400 | 0.83158700  | 42.37517100 |
| H | 14.76887100 | 0.45175000  | 36.46552000 | O | 29.44145400 | 0.74362400  | 42.97534900 |
| N | 16.93980100 | 2.96853100  | 39.15485000 | H | 30.68622100 | -0.36938600 | 44.56438500 |
| C | 17.22203100 | 3.57924500  | 40.44974500 | H | 32.63706900 | 0.91597500  | 42.79203400 |
| C | 16.90270400 | 5.08508400  | 40.50457600 | N | 30.60977100 | 1.43284600  | 41.15947700 |
| O | 16.60075600 | 5.62582400  | 41.56832900 | C | 29.41486600 | 1.79403400  | 40.39658800 |
| C | 18.67605600 | 3.32273500  | 40.85829300 | C | 28.84083500 | 0.54310900  | 39.68306200 |
| H | 17.1558400  | 2.81115500  | 38.51550300 | O | 29.49060700 | -0.50102700 | 39.59661900 |
| H | 16.55069900 | 3.13435900  | 41.18983200 | C | 29.97753700 | 2.80352000  | 39.37829600 |
| H | 19.36904400 | 3.73154900  | 40.11469000 | C | 31.34620100 | 2.18924400  | 39.02940300 |
| H | 18.88789500 | 3.78413800  | 41.82577600 | C | 31.83256200 | 1.56752900  | 40.35793300 |
| H | 18.85504300 | 2.24633200  | 40.95220100 | H | 31.21831600 | 1.40023500  | 38.28214300 |
| N | 16.99573000 | 5.76265500  | 39.32777800 | H | 28.65980600 | 2.21624100  | 41.06215000 |
| C | 16.63040200 | 7.16263600  | 39.21437400 | H | 32.55087600 | 2.22268200  | 40.86946400 |
| C | 15.12753000 | 7.51225600  | 39.22887800 | H | 32.31189700 | 0.59558000  | 40.19479700 |
| O | 14.80747300 | 8.69629500  | 39.14552000 | H | 32.05794700 | 2.92060300  | 38.63287200 |

|    |             |             |             |    |             |             |             |
|----|-------------|-------------|-------------|----|-------------|-------------|-------------|
| H  | 30.09996100 | 3.78057100  | 39.86052400 | C  | 27.91052300 | -1.76849000 | 44.98818800 |
| H  | 29.32175200 | 2.93089700  | 38.51345400 | O  | 29.09269600 | -1.78362500 | 45.31124400 |
| N  | 27.62784900 | 0.72311700  | 39.11890600 | C  | 25.01180200 | -0.29338500 | 44.77224300 |
| C  | 26.92406600 | -0.38888700 | 38.49300100 | C  | 25.12371800 | 1.10400300  | 44.97622300 |
| C  | 25.58211600 | 0.05915900  | 37.89994500 | C  | 24.26862000 | 1.76079000  | 45.82674500 |
| O  | 24.71625100 | 0.59881600  | 38.91118500 | C  | 23.23687900 | 1.04245500  | 46.55226900 |
| C  | 24.86759400 | -1.10699700 | 37.22346000 | C  | 23.18052400 | -0.39511500 | 46.36624900 |
| H  | 26.75068100 | -1.19019000 | 39.22278400 | C  | 24.04033400 | -1.02649000 | 45.49338900 |
| H  | 23.92390600 | -0.76938600 | 36.78158100 | O  | 22.41170100 | 1.63359200  | 47.30489200 |
| H  | 25.48798400 | -1.53113900 | 36.42487900 | C  | 22.43404600 | -1.08250900 | 41.07662600 |
| H  | 27.10046300 | 1.58428200  | 39.28787300 | C  | 21.76617300 | -0.01829300 | 41.93069200 |
| H  | 25.77533000 | 0.85059900  | 37.16323100 | C  | 20.65978000 | -0.35004300 | 42.73192300 |
| H  | 24.65293500 | -1.89491000 | 37.95185700 | C  | 20.06780300 | 0.59523800  | 43.55565100 |
| H  | 25.00022000 | 1.54944200  | 39.05087100 | C  | 20.55270100 | 1.95232700  | 43.65357400 |
| C  | 23.02652400 | 9.01488200  | 44.98814200 | C  | 21.67505600 | 2.25019400  | 42.80299200 |
| S  | 22.79958700 | 8.14674400  | 46.58245800 | C  | 22.25042700 | 1.30708300  | 41.97366400 |
| H  | 23.29110300 | 10.05219200 | 45.22028200 | O  | 20.02902800 | 2.83064800  | 44.41983500 |
| H  | 23.83551500 | 8.56876500  | 44.40267300 | Cl | 18.68458100 | 0.13619900  | 44.52899900 |
| C  | 23.02277100 | 6.11978100  | 42.80422700 | C  | 24.10486000 | -3.02069800 | 41.13475100 |
| H  | 23.22898400 | 6.16315600  | 41.74005400 | O  | 24.78441800 | -3.06391300 | 40.11936700 |
| C  | 25.60673800 | 5.25594500  | 46.79652200 | C  | 23.69466100 | -4.27446500 | 41.83152200 |
| H  | 26.65087600 | 5.03527400  | 46.99987500 | O  | 21.57901300 | -2.18612900 | 40.81339400 |
| C  | 21.60098200 | 5.56420800  | 49.49907500 | C  | 22.73919800 | -4.32417700 | 42.86234100 |
| H  | 21.36911600 | 5.44559800  | 50.55368800 | C  | 22.40975300 | -5.52737000 | 43.47613800 |
| C  | 19.04403600 | 6.59335900  | 45.52263000 | C  | 23.04065600 | -6.70907900 | 43.07017300 |
| H  | 17.99097500 | 6.77646100  | 45.32783300 | C  | 23.99156400 | -6.67910200 | 42.04097700 |
| C  | 24.07907100 | 5.79547800  | 43.65163600 | C  | 24.30582200 | -5.47300700 | 41.42862600 |
| C  | 25.43227500 | 5.48343700  | 43.20413100 | O  | 22.69113500 | -7.86374000 | 43.70939600 |
| C  | 26.14729800 | 5.27519900  | 44.34852400 | H  | 23.54615700 | -1.75383700 | 42.81729000 |
| C  | 25.24828800 | 5.43623200  | 45.46641800 | H  | 24.82291700 | -0.21959200 | 40.61594600 |
| C  | 25.89275800 | 5.38734600  | 41.77726300 | H  | 25.62553000 | -2.03445900 | 43.68093700 |
| H  | 26.98620000 | 5.47238900  | 41.75061900 | H  | 27.91711200 | -0.21670900 | 43.64009000 |
| H  | 25.51445200 | 6.22685300  | 41.18392200 | H  | 25.87439400 | 1.65649000  | 44.41927400 |
| C  | 25.47564200 | 4.08629900  | 41.05785100 | H  | 24.32194200 | 2.83462000  | 45.95621000 |
| H  | 25.98377300 | 3.21316600  | 41.48113200 | H  | 22.41840700 | -0.93820600 | 46.91658200 |
| H  | 24.40030800 | 3.91194900  | 41.21341900 | H  | 23.97249900 | -2.10315100 | 45.34648900 |
| C  | 25.69724300 | 4.13782300  | 39.52681800 | H  | 22.76963800 | -0.63843100 | 40.13033800 |
| O  | 25.81700500 | 3.00540500  | 38.92930000 | H  | 20.26231200 | -1.35901400 | 42.69738000 |
| O  | 25.71050200 | 5.25247500  | 38.97143000 | H  | 22.05436200 | 3.26687100  | 42.83403300 |
| C  | 24.74301000 | 5.29109600  | 47.89059800 | H  | 23.09305900 | 1.59007200  | 41.34887000 |
| C  | 25.14860400 | 5.06279300  | 49.25615800 | H  | 20.91628400 | -1.86042200 | 40.17144000 |
| C  | 24.02021900 | 5.13639000  | 50.01779400 | H  | 22.21579400 | -3.42560200 | 43.16855900 |
| C  | 22.92980900 | 5.41214600  | 49.11604700 | H  | 21.66386900 | -5.57244000 | 44.26316800 |
| C  | 20.54488900 | 5.85592300  | 48.64226100 | H  | 24.47994200 | -7.59997100 | 41.72495600 |
| C  | 19.16455600 | 5.98891700  | 49.04909800 | H  | 25.03450700 | -5.43128400 | 40.62569600 |
| C  | 18.44873400 | 6.27790200  | 47.92740700 | H  | 23.19442300 | -8.59793300 | 43.32364900 |
| C  | 19.39929000 | 6.32761300  | 46.84031800 | H  | 22.10907700 | 9.00878600  | 44.39382300 |
| C  | 19.92112200 | 6.59649000  | 44.44141500 | H  | 14.35693300 | 10.50436200 | 43.34236800 |
| C  | 19.51051500 | 6.82405300  | 43.07614000 | H  | 16.64697600 | 9.48222600  | 43.17844000 |
| C  | 20.63043100 | 6.69870100  | 42.31043000 | H  | 32.27705200 | -0.72252000 | 44.69314100 |
| C  | 21.71775800 | 6.38509000  | 43.20724000 | H  | 32.00127300 | -0.66918400 | 42.35799600 |
| N  | 23.98913500 | 5.74905000  | 45.01817100 | H  | 27.19049300 | -2.50212000 | 45.40845500 |
| N  | 23.39086600 | 5.50018900  | 47.82680400 | H  | 20.72801200 | 6.79603400  | 41.23718600 |
| N  | 20.66502400 | 6.06044000  | 47.29245400 | H  | 18.49098500 | 7.01056600  | 42.76488600 |
| N  | 21.26627100 | 6.34228100  | 44.50242300 | H  | 17.38229700 | 6.41179000  | 47.79958500 |
| Fe | 22.33483500 | 5.97881500  | 46.16354600 | H  | 18.80585800 | 5.85695400  | 50.06246900 |
| O  | 21.98024000 | 3.99008600  | 45.84360600 | H  | 23.91902600 | 5.01201900  | 51.08888400 |
| C  | 23.73173200 | -1.64721100 | 41.74801200 | H  | 26.16509100 | 4.86354300  | 49.57233200 |
| N  | 24.78696700 | -0.67458100 | 41.54003200 | H  | 27.19617000 | 5.01577900  | 44.43374800 |
| C  | 25.77129300 | -0.27787600 | 42.38292600 | H  | 27.55376400 | -0.81229300 | 37.69973100 |
| O  | 26.53749100 | 0.63958600  | 42.10406900 | H  | 25.44301200 | 5.77766000  | 36.83328100 |
| C  | 25.91880300 | -0.98158000 | 43.75958400 | H  | 16.43582800 | 2.14808300  | 36.82262100 |
| N  | 27.33146500 | -0.91195900 | 44.11670900 | H  | 12.25947600 | 6.17823700  | 38.75771900 |

|   |             |            |             |
|---|-------------|------------|-------------|
| H | 21.19514500 | 3.71418800 | 45.29062900 |
| H | 22.03277300 | 3.36941700 | 46.60282700 |
